# Supplementary material for: A conserved neuropeptide system links head and body motor circuits to enable adaptive behavior
Source: eLife. 2021 Nov 12;10:e71747. doi: 10.7554/eLife.71747 (PMC8626090; doi:10.7554/eLife.71747)
Supplement: Figure 1—source data 2. [file elife-71747-fig1-data2.xlsx]

## Sheet: Sheet1
Figure 1D
Frquency of bending angles (%)
Bending angle (degees)		wild type													nlp-12(OE)											nlp-12(OE); ckr-1(ok2502)											nlp-12(OE); ckr-2(tm3082)
-216		0	0	0	0	0	0	0	0	0	0	0	0		0	0	0	0	0	0	0	0	0	0		0	0	0	0	0	0	0	0	0	0		0	0	0	0	0	0	0	0	0	0	0	0
-192		0	0	0	0	0	0	0	0	0	0	0	0		0	0	0	0	0	0	0	0	0	0		0	0	0	0	0	0	0	0	0	0		0	0	0	0	0	0	0	0	0	0	0	0
-168		0	0	0	0	0	0	0	0	0	0	0	0		17.6923	14.2857	0	12.1951	9.52381	0	12.2093	19.2893	2.2831	6.85714		0	0	0	0	0	0	0	0	0	0		0	7.76699	0	0.913242	0	7.30594	0	0	0	3.84615	1.36364	0
-144		0	0	0	0	0	0	0	0	0	0	0	0		15.3846	18.894	0	10.9756	0.952381	0	12.7907	10.6599	0.913242	10.2857		0	0	0	0	0	0	0	0	0	0		0	20.8738	0	0	2.33918	7.30594	0	0	0	6.04396	0.454545	0
-120		0	0	0	0	0	0	0	0	0	0	0	0		8.46154	9.67742	2.77778	2.43902	4.28571	0	5.81395	10.6599	16.4384	7.42857		1.55039	6.78733	0	2.2831	0	0	0	3.72093	0	0.456621		0	7.28155	0	1.82648	4.67836	6.39269	2.73973	1.82648	0.913242	3.2967	8.63636	1.36054
-96		0	0	0	0	0	0	0	0	0	0	0	0		8.46154	12.4424	8.33333	4.87805	14.7619	0	4.06977	6.09137	13.6986	5.14286		4.65116	5.88235	0	8.6758	5.38462	0	0	1.86047	5.66038	5.93607		6.47059	7.28155	0	9.13242	4.09357	5.93607	1.82648	8.21918	0.913242	2.74725	11.3636	2.72109
-72		0	0	0	0	0	0	0	0	0	0	0	0		8.46154	5.99078	5.55556	1.21951	8.57143	4.56621	6.97674	6.59898	7.30594	4.57143		1.55039	8.59728	7.51174	15.0685	14.6154	0	1.80995	8.83721	11.7925	9.58904		10.5882	4.85437	1.82648	9.58904	10.5263	5.93607	2.2831	15.5251	7.30594	6.59341	11.8182	6.80272
-48		0.913242	0	0	0	1.0582	0	1.16279	0	0	5	1	0		3.07692	7.8341	11.1111	1.21951	7.61905	15.5251	2.90698	4.06091	8.21918	8		6.97674	14.4796	6.10329	10.9589	12.3077	4.54545	4.97738	19.5349	13.2075	12.7854		10.5882	3.88349	8.21918	11.8721	5.26316	5.47945	12.7854	19.6347	19.1781	6.59341	6.81818	10.8843
-24		15.0685	20.548	1.11732	6.39269	7.93651	3.20856	6.97674	23.75	11.4504	25	5	26		5.38462	1.84332	0	2.43902	6.19048	16.4384	5.23256	1.01523	5.02283	3.42857		9.30232	19.457	24.4132	8.21918	13.0769	38.6364	20.362	8.37209	9.90566	11.8721		19.4118	3.88349	22.3744	8.21918	16.3743	5.47945	15.5251	18.2648	14.6119	7.14286	7.27273	8.84354
0		74.4292	70.3196	74.3017	90.8676	60.8466	82.8877	44.1861	71.25	48.855	42	76	62		2.30769	1.84332	2.77778	0	7.61905	18.2648	6.97674	0	5.47945	3.42857		35.6589	17.1946	30.9859	7.30594	10.7692	43.6364	23.0769	17.6744	13.6792	6.39269		14.7059	6.31068	28.7671	5.47945	16.9591	3.19635	12.7854	10.9589	16.895	3.2967	9.54546	5.44218
24		9.58904	9.13242	24.581	2.73973	30.1587	13.9037	47.6744	5	23.6641	23	18	12		6.15385	3.22581	0	2.43902	7.14286	17.3516	2.90698	3.04569	5.47945	8		13.9535	17.1946	27.6995	9.58904	13.8461	13.1818	18.552	7.44186	15.566	8.6758		15.8824	3.88349	29.6804	8.21918	5.84795	8.6758	20.0913	12.7854	13.242	6.59341	11.8182	12.9252
48		0	0	0	0	0	0	0	0	16.0305	4	0	0		0	4.14747	0	0	3.33333	16.4384	3.48837	1.52284	11.8721	11.4286		10.8527	6.33484	2.34742	11.4155	10.7692	0	16.2896	21.8605	9.43396	6.39269		10.5882	4.85437	9.13242	8.21918	8.18713	9.13242	12.7854	4.10959	10.0457	8.24176	14.5455	10.2041
72		0	0	0	0	0	0	0	0	0	1	0	0		0.769231	1.38249	0	0	5.71429	6.39269	1.74419	1.01523	14.1553	11.4286		3.10078	0.452489	0.938967	13.6986	11.5385	0	8.1448	6.04651	14.6226	13.6986		8.23529	5.33981	0	6.84931	1.75439	11.4155	9.13242	6.84931	9.58904	6.04396	10.9091	4.08163
96		0	0	0	0	0	0	0	0	0	0	0	0		0	3.22581	13.8889	8.53659	0.952381	5.02283	5.81395	9.13706	3.65297	9.14286		8.52713	2.26244	0	10.5023	4.61538	0	6.33484	4.65116	4.71698	15.0685		1.17647	3.88349	0	12.3288	9.94152	8.21918	7.30594	1.82648	5.47945	9.34066	5.45455	3.40136
120		0	0	0	0	0	0	0	0	0	0	0	0		3.07692	3.68664	30.5556	10.9756	5.2381	0	5.23256	7.1066	3.19635	1.71429		3.87597	1.35747	0	2.2831	0.769231	0	0.452489	0	1.41509	8.21918		2.35294	3.88349	0	4.56621	3.50877	6.84931	2.73973	0	1.82648	12.0879	0	4.08163
144		0	0	0	0	0	0	0	0	0	0	0	0		6.15385	7.8341	22.2222	13.4146	3.33333	0	9.88372	9.64467	0	4.57143		0	0	0	0	1.53846	0	0	0	0	0.913242		0	6.79612	0	3.65297	2.33918	4.10959	0	0	0	10.4396	0	29.2517
168		0	0	0	0	0	0	0	0	0	0	0	0		14.6154	3.68664	2.77778	29.2683	10.4762	0	13.9535	10.1523	2.2831	4.57143		0	0	0	0	0.769231	0	0	0	0	0		0	9.2233	0	9.13242	8.18713	4.56621	0	0	0	7.69231	0	0
192		0	0	0	0	0	0	0	0	0	0	0	0		0	0	0	0	0	0	0	0	0	0		0	0	0	0	0	0	0	0	0	0		0	0	0	0	0	0	0	0	0	0	0	0
216		0	0	0	0	0	0	0	0	0	0	0	0		0	0	0	0	0	0	0	0	0	0		0	0	0	0	0	0	0	0	0	0		0	0	0	0	0	0	0	0	0	0	0	0
[truncated: 12 more columns]
