# Supplementary material for: A conserved neuropeptide system links head and body motor circuits to enable adaptive behavior
Source: eLife. 2021 Nov 12;10:e71747. doi: 10.7554/eLife.71747 (PMC8626090; doi:10.7554/eLife.71747)
Supplement: Figure 1—source data 3. [file elife-71747-fig1-data3.xlsx]

## Sheet: sheet1
Figure 1E
CKR-1 activation %
log peptide[M]		NLP-12-1							NLP-12-2
-5		82.8892	77.1265	80.0787	99.6776	94.3519	96.7406		88.807	80.5109	91.8127	86.7896	97.0841	100
-5.30103		100	76.1025	100	98.9097	89.9888	94.71		82.5234	87.4304	100	89.501	94.6773	98.4828
-6		67.2196	67.8356	77.7989	94.406	95.8071	99.3011		100	97.3597	84.6684	95.9202	92.1333	94.1663
-6.12494		73.7033	81.1642	75.9267	100	96.3122	96.3173		71.7444	91.8937	98.2015	100	100	92.0188
-6.30103		81.6972	100	76.5768	99.3339	100	100		74.3082	100	84.0317	83.7948	94.9359	98.1466
-6.60206		70.6655	67.4747	72.6221	94.8115	84.8883	80.8485		77.2319	82.0315	64.3765	76.779	87.4152	75.988
-7		79.2721	67.7551	83.882	93.2106	82.6912	84.5154		81.8442	72.1852	66.3747	79.2254	81.2273	76.9039
-7.12494		72.5702	69.8656	66.2471	90.9806	82.9566	81.9681		68.8099	72.7522	63.7895	75.6055	84.7949	72.2195
-7.30103		75.2062	63.2922	68.4655	91.2696	80.0711	80.7634		68.0715	71.2658	68.4878	76.3902	75.9633	85.094
-7.60206		51.2558	58.8861	67.4114	75.4011	76.2662	83.5498		60.7748	65.6485	90.9628	66.1363	70.8923	72.8818
-8		67.6599	60.0882	65.9513	80.8166	78.6399	85.2002		62.0338	63.1138	90.6788	64.3998	78.7185	77.0936
-8.12494		65.0348	44.3542	64.7664	76.2138	57.8492	76.6909		55.6413	65.4628	62.9452	62.7426	68.4921	56.5703
-8.30103		67.3177	48.6548	64.1933	79.5198	63.0169	80.9139		62.3102	59.2721	61.9766	66.1271	78.9862	60.4936
-8.60206		41.3899	23.971	37.744	72.0424	31.9722	60.5928		58.2985	45.4397	33.5999	60.4888	41.8524	41.7106
-9		56.7524	31.347	47.0349	69.8141	47.9339	75.8165		73.1679	60.529	51.1912	68.4924	60.9425	62.1809
-9.12494		37.048	18.4139	23.9022	50.3974	33.9906	54.8379		65.4242	39.9831	25.3276	40.9208	52.9438	26.4716
-9.30103		50.4646	17.3418	24.2638	68.3376	33.2311	52.7306		46.8342	28.8264	17.5105	45.6272	36.5776	22.235
-9.60206		19.5664	0	0	26.1555	0	13.3371		22.649	2.31669	0	21.5883	5.24369	0
-10		51.1866	23.3031	27.986	58.9608	28.2333	44.4646		30.1273	20.5877	2.03942	41.8412	37.4034	17.3572
-10.301		26.2198	13.8814	26.2867	39.0396	18.5578	49.579		22.3798	23.2905	20.9687	25.7705	25.677	19.7689
-11		28.8269	13.4226	25.3954	31.8812	12.2483	39.0952		14.7355	27.0909	8.34294	23.1348	31.9487	17.057
-12		14.6076	2.20597	24.1877	33.117	28.6058	39.7022		1.33715	13.4471	0	11.8016	13.5975	0
