# Supplementary material for: A conserved neuropeptide system links head and body motor circuits to enable adaptive behavior
Source: eLife. 2021 Nov 12;10:e71747. doi: 10.7554/eLife.71747 (PMC8626090; doi:10.7554/eLife.71747)
Supplement: Figure 1—source data 4. [file elife-71747-fig1-data4.xlsx]

## Sheet: Sheet1
Figure 1F
CKR-2 activation %
log peptide[M]		NLP-12-1							NLP-12-2
-5		100	100	100	99.1395	93.4568	100		100	100	100	100	99.5059	100
-5.30103		98.2136	98.9915	99.9358	98.3492	100	98.7267		99.0177	99.3244	97.7616	95.7679	96.7839	84.5381
-6		94.1667	97.546	98.852	98.2703	90.1207	89.671		96.7713	99.0094	95.5428	86.5773	100	87.7193
-6.12494		96.6309	95.7773	97.5107	100	96.2984	90.379		96.2643	98.6724	93.0002	87.6629	90.7406	88.5333
-6.30103		96.1828	94.3263	95.7303	93.2507	89.2965	94.9373		93.3983	93.5653	93.2262	87.2484	91.3659	86.9386
-6.60206		94.4372	93.9702	92.133	89.2351	90.6111	82.777		89.3553	91.4358	86.7975	80.0796	85.3045	80.3536
-7		91.6513	91.9512	90.8609	91.1157	81.761	81.767		86.6126	84.714	83.8895	81.2707	81.4974	75.8129
-7.12494		88.8684	85.5043	87.1572	86.1145	80.7913	76.7946		83.2505	79.324	76.935	71.6114	72.895	67.9398
-7.30103		98.6751	88.1262	87.2904	81.6686	84.0328	78.0281		80.7867	84.1166	84.422	63.6936	74.7274	70.2658
-7.60206		70.018	79.4594	78.2997	72.0408	68.7596	64.4653		75.6055	65.7931	72.1378	58.2724	60.5465	55.7308
-8		82.3129	80.4717	77.6298	77.1195	73.1504	72.4035		72.7404	74.7603	72.4411	67.0514	64.8587	59.5755
-8.12494		74.0133	57.9484	68.4747	68.5698	50.4194	54.732		61.1258	59.6833	62.3026	55.2332	46.4292	46.0589
-8.30103		77.6878	61.7971	70.0251	74.2249	54.5894	51.7042		65.3786	63.2996	63.1226	61.203	51.0948	52.4163
-8.60206		51.513	53.324	51.8426	44.3053	40.2912	39.6771		47.6415	42.8531	46.4312	36.0048	30.3739	33.0173
-9		68.8398	63.4644	64.7308	60.431	51.3095	48.9591		51.7113	45.0714	58.8511	47.034	41.5063	45.2344
-9.12494		48.7501	43.0595	48.0749	39.9829	32.8314	30.0082		36.4803	40.3729	43.3924	34.6928	26.6045	28.1715
-9.30103		60.2729	51.3959	53.2298	53.771	42.4909	39.286		48.6973	41.5057	42.2175	37.6428	29.9739	31.1284
-9.60206		42.0497	32.4714	31.2667	30.5085	15.583	19.1398		27.6476	23.5895	22.6569	20.9602	15.4964	11.6235
-10		59.4656	48.3372	48.2049	45.8721	37.418	33.681		38.9237	37.7685	35.8347	35.3899	30.1594	24.9105
-10.301		46.114	39.4764	35.7031	37.7868	31.4885	27.4572		35.0964	34.6692	38.7635	29.5243	18.6889	23.9256
-11		46.4205	38.2088	38.9874	36.8513	25.2469	21.577		29.2982	31.8764	32.37	29.3305	16.5559	15.8268
-12		41.5625	33.6878	34.7524	38.9132	28.7937	29.1414		15.8325	16.3068	18.7507	20.3309	12.3128	13.127
