# Supplementary material for: A conserved neuropeptide system links head and body motor circuits to enable adaptive behavior
Source: eLife. 2021 Nov 12;10:e71747. doi: 10.7554/eLife.71747 (PMC8626090; doi:10.7554/eLife.71747)
Supplement: Figure 2—source data 1. [file elife-71747-fig2-data1.xlsx]

## Sheet: Sheet1
Figure 2A
Single worm tracking basal locomotion - body bending (degrees)
wild type	nlp-12(ok335)	ckr-1(ok2502)	ckr-2(tm3082)	ckr-1(ok2502); ckr-2(tm3082)
12.1278	9.475	11.7472	7.8562	8.5993
9.938	8.4097	7.8222	9.3904	6.6946
11.2335	7.508	9.7939	9.5606	7.4001
11.454	7.7168	9.3063	8.7324	8.2399
10.6612	10.1843	7.8832	8.5784	7.9118
12.5784	8.3381	10.2181	7.9777	8.2326
11.8434	8.1842	8.8172	8.6376	7.9686
12.7322	6.975	7.6357	8.7525	8.6399
10.0983	8.1858	6.2775	10.4304
10.9698	8.7171	7.2961	11.4847
8.8643	7.9631	8.9624	8.1061
16.0794	7.2651	8.2294	10.5794
10.8439	6.8538	7.5153	8.5779
12.3689	6.4445	7.6835	6.6034
10.8742	5.7044	8.4958	9.2021
10.8038	6.6556	9.9014	7.6284
5.8328
11.2989
10.4008
