# Supplementary material for: A conserved neuropeptide system links head and body motor circuits to enable adaptive behavior
Source: eLife. 2021 Nov 12;10:e71747. doi: 10.7554/eLife.71747 (PMC8626090; doi:10.7554/eLife.71747)
Supplement: Figure 2—source data 2. [file elife-71747-fig2-data2.xlsx]

## Sheet: Sheet1
Figure 2B
Single worm tracking basal locomotion - head bending (degrees)
wild type	nlp-12(ok335)	ckr-1(ok2502)	ckr-2(tm3082)	ckr-1(ok2502); ckr-2(tm3082)
24.4342	22.4065	20.8425	22.7023	19.8618
23.8437	19.9285	22.8626	22.8813	20.2177
28.6638	19.1022	21.2526	23.571	17.8814
25.0764	19.2348	18.3812	21.4016	20.9443
26.2768	21.0402	19.2033	24.1768	21.3104
28.1416	20.1253	24.0376	23.5651	23.2563
25.541	20.6047	23.8384	22.4355	21.1686
22.593	16.0248	19.3277	22.7605	25.451
22.3242	19.4625	18.9186	23.9194
24.6745	17.6602	19.6223	26.2667
21.2525	19.7275	19.8535	24.3524
28.1818	21.3623	21.569	24.2641
24.9282	21.0643	21.4934	21.811
25.6994	18.2361	21.9007	22.5204
23.6634	23.3194	22.4804	21.3335
23.6712	22.3423	20.9417	21.5657
22.5453
23.2251
23.9673
