# Supplementary material for: A conserved neuropeptide system links head and body motor circuits to enable adaptive behavior
Source: eLife. 2021 Nov 12;10:e71747. doi: 10.7554/eLife.71747 (PMC8626090; doi:10.7554/eLife.71747)
Supplement: Figure 3—figure supplement 2—source data 1. [file elife-71747-fig3-figsupp2-data1.xlsx]

## Sheet: Sheet1
Figure 3 - Figure Supplement 2A
Reorientations
Forward reorientations			Reversal coupled reorientations				Total reorientations
on food	ARS		on food	ARS			on food	ARS
0	8		0	8			0	16
1	10		0	4			1	14
5	3		0	5			5	8
0	10		1	14			1	24
1	5		0	5			1	10
2	3		0	13			2	16
2	12		0	9			2	21
2	7		1	16			3	23
2			0				2
