# Supplementary material for: A conserved neuropeptide system links head and body motor circuits to enable adaptive behavior
Source: eLife. 2021 Nov 12;10:e71747. doi: 10.7554/eLife.71747 (PMC8626090; doi:10.7554/eLife.71747)
Supplement: Figure 3—figure supplement 2—source data 2. [file elife-71747-fig3-figsupp2-data2.xlsx]

## Sheet: Sheet1
Figure 3 - Figure Supplement 2B
Reorientations during ARS (0-5 minutes off food)
Forward reorientations				Reversal coupled reorientations
wild type	nlp-12(ok335)	ckr-1(ok2502)		wild type	nlp-12(ok335)	ckr-1(ok2502)
12	2	6		wild type ARS	nlp-12(lf) ARS	ckr-1(lf) ARS
3	0	0		5	9	2
3	1	3		4	7	3
9	1	1		3	1	2
3	0	1		4	6	8
3	4	9		4	2	7
9	5	1		3	7	4
3	1	0		5	10	3
9	1	0		5	8	7
11	6			8	5	4
3	1			4	6
4	0			7	0
9	3			5	0
5				9	8
10				9
9
