# Supplementary material for: A conserved neuropeptide system links head and body motor circuits to enable adaptive behavior
Source: eLife. 2021 Nov 12;10:e71747. doi: 10.7554/eLife.71747 (PMC8626090; doi:10.7554/eLife.71747)
Supplement: Figure 3—figure supplement 3—source data 3. [file elife-71747-fig3-figsupp3-data3.xlsx]

## Sheet: Sheet1
Figure 3 - Figure Supplement 3C
Reorientations during area restricted search (0-5 minutes off food)
wildtype	nlp-12(ok335)	Pser-2prom3::nlp-12;nlp-12(ok335)
7	8	4
29	4	9
17	3	0
12	4	5
18	6	3
22	3	10
20	9	5
17	11	4
		8
