# Supplementary material for: A conserved neuropeptide system links head and body motor circuits to enable adaptive behavior
Source: eLife. 2021 Nov 12;10:e71747. doi: 10.7554/eLife.71747 (PMC8626090; doi:10.7554/eLife.71747)
Supplement: Figure 3—source data 1. [file elife-71747-fig3-data1.xlsx]

## Sheet: Sheet1
Figure 3C
Reorientations during area restricted search (0-5 minutes off food)
wild type	nlp-12(ok335)	ckr-1(ok2502)	nlp-12(ok335); ckr-1(ok2502)	ckr-1 rescue	ckr-2(tm3082)	ckr-1(ok2502);ckr-2(tm3082)
10	5	7	12	9	14	5
14	7	5	14	12	11	4
11	6	5	2	11	13	4
12	1	6	3	9	9	10
16	2	7	0	9	8	7
7	3	4	8	8	9	8
8	2	6	7	12	12	1
17	3	6	9	8	13	4
12	4	4	2	14	14	6
15	9	12	4	20	11	8
16	10	9		15		8
15	7	5		18		8
17	10	9		18		3
15	11	9		10		1
12	9	5		13		5
21	7	5		7		5
15	8	7		15		7
12	3	7		15		6
22	10	7				6
10	14	8				7
7	10	11				8
10	3	11				12
8	14	6				13
13	7	6				4
7	0					10
	0
	14
