# Supplementary material for: A conserved neuropeptide system links head and body motor circuits to enable adaptive behavior
Source: eLife. 2021 Nov 12;10:e71747. doi: 10.7554/eLife.71747 (PMC8626090; doi:10.7554/eLife.71747)
Supplement: Figure 3—source data 2. [file elife-71747-fig3-data2.xlsx]

## Sheet: Sheet1
Fig 3E
Reorientations during dispersal (30-35 minutes off food)
wild type	nlp-12(ok335)	ckr-1(ok2502)	ckr-2tm382)	ckr-1(ok2502);ckr-2(tm3082)
6	1	1	2	7
2	4	2	2	2
4	3	2	5	3
4	3	2	3	3
2	2	2	4	1
3	3	3	5	0
5	1	1	3	1
8	6	2	1	1
5	6	3	6	5
6	1	3	1	5
				5
