# Supplementary material for: A conserved neuropeptide system links head and body motor circuits to enable adaptive behavior
Source: eLife. 2021 Nov 12;10:e71747. doi: 10.7554/eLife.71747 (PMC8626090; doi:10.7554/eLife.71747)
Supplement: Figure 3—source data 3. [file elife-71747-fig3-data3.xlsx]

## Sheet: Sheet1
Figure 3F
% change in reorientations from mean
wild type (-ATR)	wild type (+ATR)	nlp-12(ok335)	ckr-1(ok2502)	ckr-2(tm3082)	ckr-1(2502);ckr-2(tm3082)
-153.8	333.3	62.5	71.4	300	0
0	0	-62.5	-142.8	200	214.2
0	222.2	-125	0	100	-71.4
0	222.2	0	-71.4	100	-71.4
153.8	222.2	-62.5	0	-200	0
0	0	62.5	214.2	-100	-71.4
0	-111.1	-62.5	71.4	200	-71.4
0	222.2	0	-71.4	200	0
0	222.2	0	0	0	-142.8
76.9	222.2	-125	0	0	0
0	0	-62.5	0	-200	0
0	222.2	0	0	100	-71.4
0	111.1	-62.5	71.4	-100	-142.8
-76.9	0	-125	71.4	100	-71.4
0	111.1	62.5	-71.4	0	0
-76.9		0	0	0	0
0			-71.4	300	0
-153.8			0	200
76.9			71.4	200
				-100
				0
				100
