# Supplementary material for: A conserved neuropeptide system links head and body motor circuits to enable adaptive behavior
Source: eLife. 2021 Nov 12;10:e71747. doi: 10.7554/eLife.71747 (PMC8626090; doi:10.7554/eLife.71747)
Supplement: Figure 4—source data 1. [file elife-71747-fig4-data1.xlsx]

## Sheet: Sheet1
Figure 4B
Frequency of bending angles (%)
Bending angle (degrees)		wild type									ckr-1(OE)											ckr-1(OE);nlp-12(ok335)
-216		0	0	0	0	0	0	0	0		0	0	0	0	0	0	0	0	0	0		0	0	0	0	0	0	0	0	0	0
-192		0	0	0	0	0	0	0	0		0	0	0	0	0	0	0	0	0	0		0	0	0	0	0	0	0	0	0	0
-168		0	0	0	0	0	0	0	0		6.40394	9.58904	11.579	7.93651	37.1795	5.46875	8.72483	17.3077	5.47945	8.21918		0	0	0	0	0	0	0	0	0	0
-144		0	0	0	0	0	0	0	0		9.85222	9.13242	8.42105	3.1746	8.97436	18.75	8.05369	7.21154	7.76256	5.93607		0	0	0	0	0	0	0	0	0	0
-120		0	0	0	0	0	0	0	0		9.35961	6.39269	2.63158	12.1693	1.28205	10.9375	8.72483	2.88462	5.47945	11.4155		0	0	0	0	0	0	0	0	0	0
-96		0	0	0	0	0	0	0	0		3.94089	5.47945	4.21053	12.1693	1.28205	3.125	6.04027	7.69231	8.21918	5.47945		0	0	0	0	0	0	0	0	0	0
-72		0.526316	0	0	0	0	0	0	0.588235		5.91133	7.30594	9.47368	11.6402	1.28205	7.8125	14.7651	10.0961	1.36986	5.93607		0	0	0	0	0	0	0	0	0	0
-48		2.10526	0	0	0	0	0.666667	1.0582	6.47059		6.40394	6.39269	7.36842	2.1164	3.84615	5.46875	3.3557	4.80769	13.6986	6.84931		0	0	0.526316	0	0	0	0	0	0.952381	0
-24		28.4211	14.6341	21.6049	17.7778	6	12.6667	14.2857	31.1765		4.4335	5.93607	5.26316	4.2328	1.28205	3.90625	6.71141	5.28846	11.4155	4.56621		29.2237	4	26.8421	17.3516	10.1382	6.84931	2.73973	13	34.2857	10.9589
0		34.2105	68.7805	48.7654	80	81.3333	79.3333	66.6667	50.5882		6.40394	3.65297	3.68421	2.6455	0	6.25	5.36913	4.32692	6.84931	7.76256		68.9498	58.6667	52.1053	80.8219	43.7788	74.4292	49.3151	69.5	57.6191	85.8448
24		27.8947	15.6098	26.5432	2.22222	12.6667	6.66667	17.9894	10		2.46305	8.21918	7.89474	6.34921	5.12821	3.90625	5.36913	3.84615	4.10959	7.76256		1.82648	37.3333	19.4737	1.82648	38.7097	18.7215	44.2922	17.5	7.14286	3.19635
48		6.84211	0.97561	3.08642	0	0	0.666667	0	1.17647		3.94089	6.39269	7.89474	2.6455	3.84615	3.125	4.69799	6.25	10.0457	10.9589		0	0	1.05263	0	5.52995	0	3.65297	0	0	0
72		0	0	0	0	0	0	0	0		5.41872	7.76256	5.26316	7.93651	6.41026	3.125	5.36913	4.80769	6.39269	5.93607		0	0	0	0	1.84332	0	0	0	0	0
96		0	0	0	0	0	0	0	0		6.89655	7.30594	3.68421	9.52381	10.2564	1.5625	13.4228	2.88462	5.02283	7.30594		0	0	0	0	0	0	0	0	0	0
120		0	0	0	0	0	0	0	0		6.89655	1.36986	3.15789	3.7037	2.5641	3.90625	5.36913	11.5385	6.39269	3.65297		0	0	0	0	0	0	0	0	0	0
144		0	0	0	0	0	0	0	0		11.8227	3.19635	3.68421	5.29101	3.84615	3.125	0.671141	3.84615	5.02283	6.39269		0	0	0	0	0	0	0	0	0	0
168		0	0	0	0	0	0	0	0		9.85222	11.8721	15.7895	8.46561	12.8205	17.1875	0	7.21154	2.73973	1.82648		0	0	0	0	0	0	0	0	0	0
192		0	0	0	0	0	0	0	0		0	0	0	0	0	2.34375	3.3557	0	0	0		0	0	0	0	0	0	0	0	0	0
216		0	0	0	0	0	0	0	0		0	0	0	0	0	0	0	0	0	0		0	0	0	0	0	0	0	0	0	0
