# Supplementary material for: A conserved neuropeptide system links head and body motor circuits to enable adaptive behavior
Source: eLife. 2021 Nov 12;10:e71747. doi: 10.7554/eLife.71747 (PMC8626090; doi:10.7554/eLife.71747)
Supplement: Figure 4—source data 2. [file elife-71747-fig4-data2.xlsx]

## Sheet: Sheet1
Figure 4C
Body bending amplitude (µm)
wild type	ckr-1(OE)	ckr-1(OE);nlp-12(ok335)
41.13	95.9	27
41.96	100.06	31
46.3	90.25	29.23
35.9	94.67	26.9
40.93	129.96	20.6
47.53	137.54	31.28
40.11	123.46	36.24
43.01	106.85	32.04
49.22	135.01	37.74
33.65	152.77	27.03
35.58	137.51	40.4
35.98	121.57	37.99
	140.95	35.73
	128.66	31.51
	129.3	27.67
		45.73
