# Supplementary material for: A conserved neuropeptide system links head and body motor circuits to enable adaptive behavior
Source: eLife. 2021 Nov 12;10:e71747. doi: 10.7554/eLife.71747 (PMC8626090; doi:10.7554/eLife.71747)
Supplement: Figure 5—source data 1. [file elife-71747-fig5-data1.xlsx]

## Sheet: Sheet1
Figure 5C
Body bending amplitude (µm)
wild type	Pckr-1::ckr-1	panneuronal::ckr-1	Pmyo-3::ckr-1	Punc-47::ckr-1	Punc-17B::ckr-1	Pnpr-9::ckr-1	Pgcy-28::ckr-1	Plim-4::ckr-1	Podr-2(18)::ckr-1	Posm-6::ckr-1	Podr-2(16)::ckr-1	Plgc-55::ckr-1	Pflp-22∆4::ckr1
50.24	76.73	62.77	49.19	51.41	49.12	64.49	46.92	78.59	83.62	40.42	104.94	127.89	73.5
37.62	92.87	121.33	48.83	47.04	44.93	42.54	59.23	78.9	70.16	45.36	106.23	100.87	71.3
58.05	88.77	83.61	45.64	84.72	53.29	55.56	71.38	58.13	67.2	49.04	45.33	119.11	100.4
39.73	101.46	100.23	46.79	55.09	53.46	55.36	45.76	56.14	66.46	40.85	71.5	92.61	84.7
43.05	112.13	68.43	45.01	90.24	72.62	43.81	63.57	82.05	49.82	39.67	45.25	88.01	78.7
43.44	82.42	72.45	43.68	101.41	53.11	80.66	48.26	72.18	61.01	52.89	141.89	143.1	78.7
35.72	71.09	61.64	41.88	60.36	64.2	87.56	73.81	64.05	78.19	44.46	81.56	71.68	89.8
41.41	83.96	78.94	46.06	47.48	88.06	57.12	57.28	69.05	63.67	38.33	76.97	78.21	81.86
45.27	74.39	69.79	36.81	57.1	54.81	57.38	55.89	64.28	50.12		93.06	71.48	59.82
62.33	70.26	105.63	44.46	51.23	49.3	66.85	67.22		73.39		101.03	144.48	92.57
66.83	70.93			130.02	44.25	46.64	52.37		73.9		103.28	47.5	71.64
	75.45			36.36							127.27
	104.26			66.81							149
				77.72							100.56
