# Supplementary material for: A conserved neuropeptide system links head and body motor circuits to enable adaptive behavior
Source: eLife. 2021 Nov 12;10:e71747. doi: 10.7554/eLife.71747 (PMC8626090; doi:10.7554/eLife.71747)
Supplement: Figure 6—figure supplement 1—source data 1. [file elife-71747-fig6-figsupp1-data1.xlsx]

## Sheet: Sheet1
Figure 6 - Figure Supplement 1B
Frequency of bending angles (%)
Bending angle (degrees)		Pflp-22∆4::ckr-1(OE)									SMD::ckr-1(OE); nlp-12(ok335)
-216		0	0	0	0	0	0	0	0		0	0	0	0	0	0	0	0
-204		0	0	0	0	0	0	0	0		0	0	0	0	0	0	0	0
-180		0	0	0	0	0	1	1.36054	0		0	0	0	0	0	0	0	0
-156		0	0	0	0	0	0	1.47392	0		0	0	0	0	0	0	0	0
-132		0	0	0	1.77778	0	0	0	0		0	0	0	0	0	0	0	0
-108		0	3.55556	0	8.11111	0	0	1.02041	0		0	0	0	0	0	0	0	0
-84		1.88889	9.55556	0	15	0	1.88889	4.98866	8.88889		0	0	0	0	0	0	0	0
-60		10.8889	15	0	10.4444	1.44444	9.33333	15.1927	14.6667		0	0	0	0	0	0	0	0
-36		12.1111	15.3333	6.59062	9.22222	12.4444	19.5556	16.3265	12		8.44444	0	0	0	0	0	0	0
-12		13.8889	13.6667	33.2066	10.1111	21.6667	18.6667	12.9252	19.8889		61.6667	53.9216	52.5502	25	0.706215	10.4274	48.2222	67.5325
12		9.55556	16.7778	25.4753	10.4444	18.8889	5.44444	13.0385	11.6667		29.8889	46.0784	47.4498	72.3333	95.1977	89.5726	51.7778	32.4675
36		11.2222	17.8889	19.2649	12.2222	21.8889	6	11.1111	10.6667		0	0	0	2.66667	4.09605	0	0	0
60		19.8889	6.77778	15.4626	17.7778	15.1111	4.88889	9.52381	9.11111		0	0	0	0	0	0	0	0
84		8.22222	1.44444	0	4.88889	8.55556	7.44444	8.04989	10.4444		0	0	0	0	0	0	0	0
108		6.66667	0	0	0	0	12	1.5873	2.66667		0	0	0	0	0	0	0	0
132		5.66667	0	0	0	0	7	0.566893	0		0	0	0	0	0	0	0	0
156		0	0	0	0	0	3.77778	2.38095	0		0	0	0	0	0	0	0	0
180		0	0	0	0	0	3	0.453515	0		0	0	0	0	0	0	0	0
204		0	0	0	0	0	0	0	0		0	0	0	0	0	0	0	0
216		0	0	0	0	0	0	0	0		0	0	0	0	0	0	0	0
