# Supplementary material for: A conserved neuropeptide system links head and body motor circuits to enable adaptive behavior
Source: eLife. 2021 Nov 12;10:e71747. doi: 10.7554/eLife.71747 (PMC8626090; doi:10.7554/eLife.71747)
Supplement: Figure 6—figure supplement 1—source data 2. [file elife-71747-fig6-figsupp1-data2.xlsx]

## Sheet: Sheet1
Figure 6 - Figure Supplement 1C
Frequency of bending angles (%)
Bending angle (degrees)		wild type (no photoactivation)								ckr-1(OE); SMD::miniSOG (no photoactivation)
-216		0	0	0	0	0	0	0		0	0	0	0	0	0	0
-204		0	0	0	0	0	0	0		0	0	0	0	0	0	0
-180		0	0	0	0	0	0	0		0.888889	4.91607	0.584795	4.91607	0	3.42298	3.96679
-156		0	0	0	0	0	0	0		14.6667	1.67866	14.9123	1.67866	0	4.52323	3.50554
-132		0	0	0	0	0	0	0		5.77778	2.8777	7.16374	2.8777	1.44444	6.35697	6.54982
-108		0	0	0	0	0	0	0		3.44444	6.59472	4.53216	6.59472	3.22222	6.96822	10.4244
-84		0	0	0	0	0	0	0		6.44444	12.2302	8.91813	12.2302	20.5556	7.33496	7.47232
-60		0	0	0	0	0	0.514801	0		16.1111	10.0719	20.0292	10.0719	4.66667	4.40098	6.08856
-36		0	0	2.88889	3.84615	6.11111	8.10811	0		13.8889	7.55396	17.5439	7.55396	8.55556	7.33496	4.8893
-12		30.7778	20.3333	24.2222	33.9744	50.8889	35.9073	35.3333		10.3333	5.9952	10.5263	5.9952	27.2222	6.11247	4.61255
12		59	59.6667	53.5556	47.7564	40	38.7387	63.4444		8.77778	6.35492	8.62573	6.35492	26	5.50122	4.05904
36		7.22222	20	19.2222	13.6218	3	14.2857	1.22222		10.5556	8.753	7.16374	8.753	7.11111	8.92421	5.0738
60		3	0	0.111111	0.801282	0	2.4453	0		9.11111	11.0312	0	11.0312	1.22222	7.33496	4.15129
84		0	0	0	0	0	0	0		0	3.95683	0	3.95683	0	10.8802	5.99631
108		0	0	0	0	0	0	0		0	5.7554	0	5.7554	0	11.0024	9.31734
132		0	0	0	0	0	0	0		0	2.39808	0	2.39808	0	2.93399	7.56458
156		0	0	0	0	0	0	0		0	6.11511	0	6.11511	0	3.42298	10.7934
180		0	0	0	0	0	0	0		0	3.71703	0	3.71703	0	3.54523	5.53506
204		0	0	0	0	0	0	0		0	0	0	0	0	0	0
216		0	0	0	0	0	0	0		0	0	0	0	0	0	0
