# Supplementary material for: A conserved neuropeptide system links head and body motor circuits to enable adaptive behavior
Source: eLife. 2021 Nov 12;10:e71747. doi: 10.7554/eLife.71747 (PMC8626090; doi:10.7554/eLife.71747)
Supplement: Figure 6—source data 1. [file elife-71747-fig6-data1.xlsx]

## Sheet: Sheet1
Figure 6B
Frequency of bending angles (%)
Bending angle (degrees)		wild type										Podr-2(16)::ckr-1(OE)										Pflp-22∆4::ckr-1(OE)
-216		0	0	0	0	0	0	0	0	0		0	0	0	0	0	0	0	0	0		0	0	0	0	0	0	0	0	0	0	0
-192		0	0	0	0	0	0	0	0	0		0	0	0	0	0	0	0	0	0		0	0	0	0	0	0	0	0	0	0	0
-168		0	0	0	0	0	0	0	0	0		4.15	10	0	16.67	7.89	1.93	10.29	0	2.45		0.690805	1.16815	2.62184	0.288878	0.068182	0.478043	0	0	0	0	0
-144		0	0	0	0	0	0	0	0	0		1.04	0	0	44.44	2.63	0	1.47	0	0		0.809909	6.25206	4.45712	1.94993	0.136364	0.144525	0.329457	0	0	0	0
-120		0	0	0	0	0	0	0	0	0		3.11	8	0	11.11	0	0.48	1.47	0	0		0.976656	8.50609	6.77051	5.39239	0.25	1.38966	0.658915	0	1.55199	0	1.30719
-96		0	0	0	0	0	0	0	0	0		6.22	4	0	5.56	13.16	5.31	16.18	0	0		1.90567	7.73281	6.47748	6.42754	0.340909	3.49083	3.27519	0	2.89705	0	6.25584
-72		0	0	0	0	0	0	0	0	0		15.03	2	1.77	0	7.89	10.63	7.35	1.33	8.59		5.39543	8.68707	6.0765	9.50891	2.79546	4.21345	9.59302	0.152517	7.81169	1.51771	12.0448
-48		5	1	0	0	0	7	0	9	0		16.06	4	17.7	0	7.89	6.76	2.94	10.62	11.66		7.69414	8.14413	9.05305	11.8681	11.7273	5.66982	14.2829	1.22013	14.0197	10.8347	15.6396
-24		25	5	26	5	10	52	32	13	14		12.44	12	15.93	0	5.26	17.39	4.41	16.37	22.09		17.2344	6.77855	9.85503	10.3033	13.25	14.7638	11.4729	11.4387	12.1055	15.5986	12.8385
0		42	76	62	50	68	36	63	42	78		4.15	4	26.11	5.56	2.63	20.29	2.94	31.86	16.56		17.3892	5.3307	6.50833	8.81078	15	12.5181	10.407	25.877	8.79462	14.6712	11.5313
24		23	18	12	40	16	5	5	29	9		4.15	4	12.39	0	7.89	14.49	4.41	13.27	16.56		17.5798	4.17901	4.75015	6.18681	18.8864	11.2173	8.52713	22.3945	10.3983	8.76897	15.4062
48		4	0	0	4	3	0	0	3	0		1.55	6	13.27	0	7.89	11.11	5.88	20.8	14.72		14.6379	5.87364	5.876	11.3625	16.4318	13.3407	10.1744	18.3274	10.657	10.2024	17.4136
72		1	0	0	0	3	0	0	5	0		3.63	12	3.98	5.56	10.53	11.59	10.29	5.75	3.07		7.63459	6.44949	8.08143	12.3977	11.75	9.5164	10.2907	11.2862	14.537	14.3339	6.44258
96		0	0	0	0	0	0	0	0	0		10.36	10	8.85	5.56	0	0	4.41	0	1.23		3.83516	8.99967	9.50031	9.19596	4.68182	10.7949	11.1822	7.52415	11.3813	11.2563	1.12045
120		0	0	0	0	0	0	0	0	0		10.36	2	0	5.56	0	0	4.41	0	1.23		1.89376	9.92103	6.41579	2.40732	3.86364	9.09394	6.25969	1.60142	5.4837	11.425	0
144		0	0	0	0	0	0	0	0	0		5.18	6	0	0	0	0	8.82	0	0		0.774178	6.2356	5.90685	2.52768	0.772727	2.9572	3.27519	0.177936	0.362131	1.39123	0
168		0	0	0	0	0	0	0	0	0		2.59	16	0	0	26.32	0	14.71	0	1.84		0.666984	4.40935	3.54719	1.08329	0.022727	0.41134	0.271318	0	0	0	0
192		0	0	0	0	0	0	0	0	0		0	0	0	0	0	0	0	0	0		0.881372	1.33268	4.10241	0.288878	0.022727	0	0	0	0	0	0
216		0	0	0	0	0	0	0	0	0		0	0	0	0	0	0	0	0	0		0	0	0	0	0	0	0	0	0	0	0
