# Supplementary material for: A conserved neuropeptide system links head and body motor circuits to enable adaptive behavior
Source: eLife. 2021 Nov 12;10:e71747. doi: 10.7554/eLife.71747 (PMC8626090; doi:10.7554/eLife.71747)
Supplement: Figure 6—source data 2. [file elife-71747-fig6-data2.xlsx]

## Sheet: Sheet1
Figure 6E
Frequency of bending angles (%)
Bending angle (degrees)		ckr-1(OE) photoactivated												ckr-1(OE)+pSMDmSOG+photoactivation
-216		0	0	0	0	0	0	0	0	0	0	0		0	0	0	0	0	0	0	0	0	0	0
-204		0	0	0	0	0	0	0	0	0	0	0		0	0	0	0	0	0	0	0	0	0	0
-180		0	0	0	0	0	1.90896	0	0	0	0	0		0	0	0	0	0	0	0	0	0	0	0
-156		0	0	0	0	0	0.293686	0	9.25926	0	0	0		0	0	0	0	0	0	0	0	0	0	0
-132		0	0	0	0	0	0.440529	0.888889	6.48148	4.11111	0	0		0	0	0	0	0	0	0	0	0	0	0
-108		0	0	0.444444	0	0.304878	0.587372	13.8889	6.48148	8.66667	0	3.72389		0	0	0	0	0	0	0	0	0	0	0
-84		4.22222	3.55556	2.22222	0.111111	0	11.7474	17	18.5185	9.33333	7.11111	1.08992		0.485437	0	0.531915	0	0	0	0	0	0	0	0
-60		13.6667	7.77778	11.3333	5.33333	0	8.51689	25.6667	9.25926	10.7778	2.22222	6.08538		0.970874	3	1.06383	0	0	0	0	0	0	0	12.1111
-36		14.8889	8.33333	34.6667	18.7778	3.04878	7.1953	23.7778	7.40741	9	12.2222	17.6203		24.7573	16.5556	0.531915	5.88889	0.888889	6.66667	9.22222	15.2222	20.7778	0	17.1111
-12		10.8889	36.1111	49.1111	15.7778	25.3049	7.63583	14.3333	9.25926	9.77778	36.5556	28.0654		44.6602	39.5556	38.8298	38.6667	19.7778	42.4	83.1111	84.7778	70.5556	56.5556	25.5556
12		11.7778	15	2.22222	17.7778	19.5122	10.1322	3.22222	19.4444	9.77778	13.3333	23.7057		29.1262	31.7778	22.3404	45	69.4444	50.9333	7.66667	0	8.66667	43.4444	24
36		20.7778	18.5556	0	20.4444	31.4024	15.4185	1.22222	13.8889	9.66667	12.2222	9.35513		0	7.66667	4.78723	10.4444	9.55556	0	0	0	0	0	20.6667
60		10.6667	10.6667	0	14.6667	11.5854	9.83847	0	0	7.11111	16.3333	8.53769		0	1.44444	15.9574	0	0.333333	0	0	0	0	0	0.555556
84		13.1111	0	0	6.11111	7.62195	5.28634	0	0	5.66667	0	1.81653		0	0	14.8936	0	0	0	0	0	0	0	0
108		0	0	0	1	0.914634	4.40529	0	0	8.33333	0	0		0	0	1.06383	0	0	0	0	0	0	0	0
132		0	0	0	0	0.304878	3.96476	0	0	7.77778	0	0		0	0	0	0	0	0	0	0	0	0	0
156		0	0	0	0	0	8.37004	0	0	0	0	0		0	0	0	0	0	0	0	0	0	0	0
180		0	0	0	0	0	4.25844	0	0	0	0	0		0	0	0	0	0	0	0	0	0	0	0
204		0	0	0	0	0	0	0	0	0	0	0		0	0	0	0	0	0	0	0	0	0	0
216		0	0	0	0	0	0	0	0	0	0	0		0	0	0	0	0	0	0	0	0	0	0
														0	0	0	0	0	0	0	0	0	0	0
