# Supplementary material for: A conserved neuropeptide system links head and body motor circuits to enable adaptive behavior
Source: eLife. 2021 Nov 12;10:e71747. doi: 10.7554/eLife.71747 (PMC8626090; doi:10.7554/eLife.71747)
Supplement: Figure 6—source data 3. [file elife-71747-fig6-data3.xlsx]

## Sheet: Sheet1
Figure 6F
Body bending amplitude (µm)
ckr-1(OE) photoactivated	ckr-1(OE)+pSMDmSOG+photoactivation
176	65
98.35	81.17
71.17	96.96
157.66	104.83
186.81	79.81
259.6	85.13
194.77	96.53
288.87	78.16
261.68	90.16
112.52	82.2
148.61	63.88
