# Supplementary material for: A conserved neuropeptide system links head and body motor circuits to enable adaptive behavior
Source: eLife. 2021 Nov 12;10:e71747. doi: 10.7554/eLife.71747 (PMC8626090; doi:10.7554/eLife.71747)
Supplement: Figure 7—figure supplement 1—source data 1. [file elife-71747-fig7-figsupp1-data1.xlsx]

## Sheet: Sheet1
Figure 7 - Figure Supplement 1A
Frequency of bending angles (%)
Bending angle (degrees)		wild type									Pflp-22∆4::ckr-1 (5 ng/µL)
-216		0	0	0	0	0	0	0	0		0	0	0	0	0	0	0	0
-204		0	0	0	0	0	0	0	0		0	0	0	0	0	0	0	0
-180		0	0	0	0	0	0	0	0		0	0	0	0	0	0	0	0
-156		0	0	0	0	0	0	0	0		0	0	0	0	0	0	0	0
-132		0	0	0	0	0	0	0	0		0	0	0	0	0	0	0	0
-108		0	0	0	0	0	0	0	0		0	0	0	0	0	0	0	0
-84		0	0	0	0	0	0	0	0		0	0.007598	0	0	0.002209	0	0	0
-60		0.002475	0	0.042629	0.07767	0	0	0	0.007216		0	0.023963	0	0.024575	0.082275	0	0	0.013219
-36		0.085809	0.06746	0.357016	0.224688	0.017192	0.158011	0.026846	0.087629		0.018018	0.127995	0.04903	0.177694	0.252347	0.024059	0.024757	0.209176
-12		0.395215	0.449735	0.357016	0.234397	0.377507	0.374586	0.359732	0.480412		0.453829	0.29924	0.702758	0.327032	0.285478	0.299815	0.296198	0.381804
12		0.363861	0.425926	0.195382	0.37448	0.553009	0.348066	0.532886	0.356701		0.518581	0.265926	0.24617	0.310019	0.194368	0.586675	0.457118	0.323484
36		0.133663	0.056878	0.047957	0.088766	0.052292	0.119337	0.069799	0.06701		0.009572	0.243717	0.002043	0.136106	0.126449	0.088834	0.221927	0.057543
60		0.018977	0	0	0	0	0	0.010738	0.001031		0	0.03156	0	0.024575	0.04804	0.000617	0	0.014774
84		0	0	0	0	0	0	0	0		0	0	0	0	0.008835	0	0	0
108		0	0	0	0	0	0	0	0		0	0	0	0	0	0	0	0
132		0	0	0	0	0	0	0	0		0	0	0	0	0	0	0	0
156		0	0	0	0	0	0	0	0		0	0	0	0	0	0	0	0
180		0	0	0	0	0	0	0	0		0	0	0	0	0	0	0	0
204		0	0	0	0	0	0	0	0		0	0	0	0	0	0	0	0
216		0	0	0	0	0	0	0	0		0	0	0	0	0	0	0	0
