# Supplementary material for: A conserved neuropeptide system links head and body motor circuits to enable adaptive behavior
Source: eLife. 2021 Nov 12;10:e71747. doi: 10.7554/eLife.71747 (PMC8626090; doi:10.7554/eLife.71747)
Supplement: Figure 7—figure supplement 1—source data 2. [file elife-71747-fig7-figsupp1-data2.xlsx]

## Sheet: Sheet1
Figure 7 - Figure Supplement 1B
SMD photostimulation - Body bending amplitude (µm)
+ATR prestim	+ATR +STIM
43.1	71.8
58	82.61
43.4	53.8
65.5	62.4
45.3	61.64
34	38.56
43.04	37.8
67.61	81.2
47.19	44
43.07	53.72
41.01	55.135
40.1	39.7
35.7	35.7
45.3	61.64
