# Supplementary material for: A conserved neuropeptide system links head and body motor circuits to enable adaptive behavior
Source: eLife. 2021 Nov 12;10:e71747. doi: 10.7554/eLife.71747 (PMC8626090; doi:10.7554/eLife.71747)
Supplement: Figure 7—source data 1. [file elife-71747-fig7-data1.xlsx]

## Sheet: Sheet1
Figure 7A
Reorientations during area restricted search (0-5 minutes off food)
wild type	ckr-1(ok2502)	Podr-2(16)::ckr-1 rescue	Plgc-55::ckr-1 rescue	Pflp-22d4::ckr-1 rescue
9	5	13	18	15
17	5	12	7	14
10	6	8	24	17
18	11	9	14	15
9	5	8	8	21
20	9	16	15	10
13	6	16	13	20
11	3	12	6	13
12	8	10	13	19
18	9	15	27
11	5	18	12
9	5	11	16
16	7
15	7
9	7
17	8
10	11
18	11
9	6
18	6
11	3
9	7
16	5
15	11
16	5
17	10
9	6
13	3
21	8
15	10
12	6
22	6
10
7
10
8
13
7
