# Supplementary material for: A conserved neuropeptide system links head and body motor circuits to enable adaptive behavior
Source: eLife. 2021 Nov 12;10:e71747. doi: 10.7554/eLife.71747 (PMC8626090; doi:10.7554/eLife.71747)
Supplement: Figure 7—source data 2. [file elife-71747-fig7-data2.xlsx]

## Sheet: Sheet1
Figure 7C
SMD photostimulation reorientations
+ATR Prestim	+ATR +STIM		-ATR preSTIM	-ATR +STIM
2	7		1	0
0	0		0	0
0	8		1	0
0	3		0	0
0	1		0	2
0	6		1	0
4	8		0	0
1	2		0	0
2	1		1	3
0	9		0	0
1	2
0	3
2	3
0	4
0	1
0	0
0	1
