# Supplementary material for: A conserved neuropeptide system links head and body motor circuits to enable adaptive behavior
Source: eLife. 2021 Nov 12;10:e71747. doi: 10.7554/eLife.71747 (PMC8626090; doi:10.7554/eLife.71747)
Supplement: Figure 7—source data 3. [file elife-71747-fig7-data3.xlsx]

## Sheet: Sheet1
Figure 7D
Reorientations during ARS (0-5 minutes off food) during SMD silencing
wild type (-Histamine)	wild type (+Histamine)	SMD::HisCL1(-Histamine)	SMD::HisCL1(+Histamine)
18	17	22	0
23	16	14	3
7	17	22	14
11	13	11	17
13	9	19	0
20	13	14	1
11	6	19	5
8		11	10
