# Supplementary material for: A conserved neuropeptide system links head and body motor circuits to enable adaptive behavior
Source: eLife. 2021 Nov 12;10:e71747. doi: 10.7554/eLife.71747 (PMC8626090; doi:10.7554/eLife.71747)
Supplement: Figure 8—source data 1. [file elife-71747-fig8-data1.xlsx]

## Sheet: Sheet1
Figure 8A-D
SMD calcium imaging [Ratio (GCaMP6s/mCherry)]
		wild type ARS																			wild type dispersal								ckr-1(lf) ARS
Frames	Time (sec)	1	2	3	4	5	6	7	8	9	10	11	12	13	14	15	16	17	18		1	2	3	4	5	6	7		1	2	3	4	5	6	7
1	0.0666667	0.21428	0.266197	0.286989	0.274349	0.165794	0.270004	0.254386	0.495661	0.084394	0.319104	0.354102	0.352438	0.358982	0.060665	0.367246	0.282851	0.307844	0.12785		0.033856	0.033856	0.033856	0.0356381	0.033918	0.0218907	0.0228152		0.0771983	0.0177735	0.023923	0.0281317	0.013475	0.0268881	0.02102
2	0.133333	0.212075	0.272228	0.291097	0.243399	0.153776	0.264897	0.248761	0.440807	0.101544	0.288533	0.342658	0.352784	0.377574	0.0684	0.370562	0.281576	0.245752	0.123581		0.0284199	0.02842	0.02842	0.0470588	0.048247	0.0278626	0.0266075		0.0665564	0.0272082	0.048708	0.0451976	0.048472	0.0274152	0.03073
3	0.2	0.219882	0.266568	0.295232	0.238952	0.124757	0.260428	0.239186	0.530108	0.076023	0.281253	0.337974	0.35235	0.373733	0.0677	0.320648	0.269427	0.25	0.121422		0.0331325	0.033133	0.033133	0.0420053	0.04704	0.0261918	0.0272703		0.0735294	0.0276151	0.054901	0.0303651	0.044446	0.0242057	0.026653
4	0.266667	0.219949	0.262051	0.310035	0.236418	0.153877	0.260847	0.240676	0.38806	0.070946	0.295658	0.322608	0.350797	0.366955	0.059062	0.311163	0.270144	0.258224	0.114945		0.0286152	0.028615	0.028615	0.0373885	0.05318	0.0289883	0.028342		0.0739086	0.0242439	0.045191	0.0682541	0.059422	0.0272059	0.030672
5	0.333333	0.210981	0.261722	0.315866	0.234759	0.133824	0.257854	0.239787	0.321748	0.055093	0.301381	0.313308	0.355303	0.370667	0.057635	0.306079	0.262832	0.256898	0.135354		0.0269216	0.026922	0.026922	0.039884	0.048347	0.0324726	0.0184707		0.0610122	0.0282574	0.056271	0.0634869	0.04733	0.026456	0.027153
6	0.4	0.213706	0.262771	0.316985	0.226197	0.133029	0.246986	0.232136	0.327498	0.081356	0.288615	0.319306	0.356963	0.335359	0.064265	0.299572	0.266911	0.250835	0.111677		0.0289359	0.028936	0.028936	0.0467281	0.048551	0.0342727	0.0200787		0.0854467	0.0245601	0.049304	0.0550987	0.048938	0.0231068	0.026078
7	0.466667	0.207277	0.259787	0.316968	0.22966	0.134605	0.216452	0.227639	0.349811	0.068096	0.301538	0.327275	0.354159	0.318302	0.063432	0.287188	0.264573	0.259334	0.103778		0.0299356	0.029936	0.029936	0.039976	0.054365	0.0334187	0.0223534		0.104171	0.0219561	0.067617	0.0376003	0.045473	0.0258522	0.03222
8	0.533333	0.202323	0.259504	0.28122	0.217619	0.130175	0.241152	0.240353	0.357197	0.090633	0.296939	0.333542	0.358537	0.320594	0.068932	0.315241	0.259053	0.270333	0.079766		0.030612	0.030612	0.030612	0.0419425	0.049527	0.0302914	0.0216346		0.0817611	0.021325	0.049267	0.0407635	0.032902	0.02298	0.029
9	0.6	0.206897	0.252567	0.260997	0.218155	0.151252	0.222587	0.227705	0.367656	0.104643	0.284838	0.336678	0.365654	0.317476	0.067247	0.315348	0.269381	0.273905	0.082152		0.0259699	0.02597	0.02597	0.0411677	0.057841	0.0310643	0.0194113		0.0769315	0.0260331	0.038524	0.0452318	0.04413	0.0227766	0.031432
10	0.666667	0.204743	0.248291	0.2593	0.222907	0.13424	0.242425	0.233347	0.379323	0.095154	0.286034	0.339632	0.358966	0.319326	0.073347	0.289102	0.275078	0.254433	0.121626		0.0280674	0.028067	0.028067	0.036879	0.0415	0.0323508	0.0212819		0.0861384	0.0277673	0.069791	0.0590012	0.052738	0.0263936	0.026715
11	0.733333	0.201625	0.243361	0.272644	0.222543	0.139805	0.246885	0.252584	0.377019	0.085406	0.287393	0.344322	0.359536	0.317767	0.065078	0.319814	0.272775	0.262831	0.101288		0.0266203	0.02662	0.02662	0.0430106	0.046643	0.0339446	0.0243373		0.0862607	0.0229545	0.064574	0.0374376	0.046227	0.02242	0.023882
12	0.8	0.204664	0.22123	0.275627	0.219618	0.161077	0.242991	0.248312	0.399845	0.098802	0.299275	0.32393	0.36556	0.316673	0.06561	0.342934	0.273239	0.276022	0.10413		0.0263281	0.026328	0.026328	0.0431293	0.04523	0.0361897	0.0205728		0.0803872	0.0209092	0.078572	0.0678389	0.04577	0.0262456	0.030171
13	0.866667	0.197845	0.206025	0.270326	0.214133	0.154917	0.234224	0.245818	0.344371	0.098889	0.286169	0.32722	0.36761	0.325703	0.052196	0.300748	0.269921	0.285929	0.055663		0.0248873	0.024887	0.024887	0.0428369	0.055842	0.0339637	0.0223587		0.0821918	0.0165563	0.066303	0.0439597	0.050003	0.024653	0.017759
14	0.933333	0.198295	0.203792	0.268587	0.211097	0.145942	0.243462	0.25984	0.328604	0.081206	0.277354	0.330061	0.368321	0.316462	0.061852	0.293623	0.266772	0.294967	0.098801		0.0327368	0.032737	0.032737	0.0517307	0.053645	0.0388066	0.0160031		0.0789726	0.0228835	0.084685	0.0701487	0.050841	0.0244862	0.024425
15	1	0.185772	0.22803	0.265086	0.214624	0.130946	0.243923	0.247854	0.331693	0.097769	0.281295	0.343288	0.361174	0.305769	0.060796	0.290635	0.274326	0.284868	0.099258		0.0253642	0.025364	0.025364	0.0490924	0.063778	0.0303514	0.0214256		0.0738675	0.0155505	0.083653	0.0448674	0.051717	0.023048	0.02502
16	1.06667	0.189061	0.244379	0.261862	0.211955	0.11782	0.245936	0.253033	0.335297	0.116461	0.258034	0.340267	0.368097	0.310147	0.074032	0.307015	0.277975	0.299189	0.120112		0.0275087	0.027509	0.027509	0.0496779	0.062273	0.031311	0.022637		0.0815137	0.0205347	0.104868	0.0468952	0.047182	0.0245136	0.027214
17	1.13333	0.188545	0.239607	0.26066	0.227084	0.136939	0.227428	0.259434	0.342191	0.118117	0.245925	0.341835	0.368147	0.31771	0.076035	0.315364	0.276611	0.308002	0.116943		0.0298619	0.029862	0.029862	0.0466165	0.053439	0.0284711	0.0204976		0.0765653	0.0238952	0.099335	0.0416002	0.049155	0.0267042	0.028598
18	1.2	0.184942	0.2409	0.2559	0.22121	0.153305	0.252676	0.249422	0.348334	0.100609	0.237477	0.336544	0.375867	0.311046	0.084343	0.295712	0.266987	0.32118	0.127942		0.0293781	0.029378	0.029378	0.0536318	0.042796	0.0297689	0.0222222		0.0701475	0.0233546	0.113368	0.0444782	0.052106	0.0296378	0.030014
19	1.26667	0.191401	0.247055	0.250699	0.231153	0.198042	0.249364	0.276877	0.337212	0.09811	0.228572	0.467178	0.366615	0.327905	0.075684	0.287917	0.268622	0.309705	0.114208		0.0304735	0.030474	0.030474	0.0604296	0.037426	0.0265795	0.0177515		0.0694438	0.0232838	0.098829	0.0296104	0.054249	0.0307035	0.020408
20	1.33333	0.182441	0.245195	0.238845	0.222304	0.22129	0.260576	0.266293	0.344824	0.087262	0.233259	0.44852	0.373021	0.31507	0.064912	0.288928	0.253931	0.300895	0.109171		0.0300899	0.03009	0.03009	0.0544083	0.046657	0.0281802	0.0179105		0.0841723	0.0223695	0.085855	0.0502192	0.047894	0.033284	0.027013
21	1.4	0.185709	0.247714	0.248057	0.23595	0.206051	0.261383	0.253189	0.339816	0.079253	0.230577	0.305893	0.385516	0.322189	0.043103	0.304426	0.269346	0.331647	0.10879		0.0276803	0.02768	0.02768	0.0489375	0.041201	0.0308989	0.0204161		0.0627346	0.0191296	0.076206	0.0545674	0.056807	0.0312618	0.026022
22	1.46667	0.187039	0.25763	0.252473	0.226064	0.289916	0.268989	0.240898	0.349213	0.098507	0.234437	0.295648	0.376723	0.322796	0.071309	0.324295	0.27404	0.320553	0.091551		0.0297265	0.029727	0.029727	0.0591744	0.040589	0.0302433	0.0195303		0.0852965	0.0204573	0.090445	0.0474532	0.068032	0.027819	0.027367
23	1.53333	0.191759	0.249811	0.247483	0.229227	0.215286	0.273056	0.239	0.337337	0.110909	0.234407	0.309166	0.386333	0.303947	0.058447	0.30167	0.264196	0.329379	0.094498		0.0289843	0.028984	0.028984	0.0571429	0.041853	0.0286527	0.0206981		0.0616882	0.0289042	0.081297	0.0284618	0.062241	0.0365097	0.027255
24	1.6	0.182968	0.245972	0.247694	0.228798	0.221851	0.268976	0.233366	0.333071	0.128247	0.231821	0.337637	0.37867	0.30423	0.046189	0.281304	0.262727	0.333565	0.108633		0.0267192	0.026719	0.026719	0.0638298	0.045858	0.0269293	0.0222134		0.0769779	0.0262217	0.075291	0.0654199	0.078883	0.0337995	0.022019
25	1.66667	0.185316	0.250701	0.261291	0.23168	0.234253	0.270604	0.240486	0.324394	0.104922	0.236611	0.347792	0.380912	0.306627	0.047087	0.276405	0.258964	0.33555	0.069987		0.0264051	0.026405	0.026405	0.0643583	0.035834	0.0276763	0.0191001		0.0575957	0.0240115	0.09296	0.0627648	0.063745	0.0316928	0.021195
26	1.73333	0.184778	0.256796	0.255921	0.231977	0.201493	0.277744	0.231014	0.328405	0.114949	0.233674	0.34931	0.35125	0.319513	0.061316	0.296971	0.270691	0.338888	0.10558		0.0303368	0.030337	0.030337	0.060202	0.038155	0.0250922	0.020332		0.0618381	0.0219116	0.075038	0.059891	0.066849	0.0356037	0.018486
27	1.8	0.189084	0.257711	0.254745	0.239103	0.164216	0.276321	0.233831	0.327725	0.114113	0.242102	0.343349	0.382226	0.318916	0.063056	0.307604	0.244776	0.338413	0.093514		0.0279198	0.02792	0.02792	0.0707033	0.036355	0.0277375	0.0230386		0.0681908	0.0215094	0.067785	0.0545176	0.095257	0.0296053	0.028614
28	1.86667	0.186927	0.250194	0.259586	0.232455	0.169199	0.278323	0.228188	0.324592	0.128005	0.233742	0.326424	0.392198	0.306019	0.058013	0.287013	0.260841	0.336699	0.070615		0.0312983	0.031298	0.031298	0.0783566	0.048081	0.0302673	0.021814		0.0728695	0.0208967	0.058987	0.0622741	0.07201	0.0375597	0.024336
29	1.93333	0.181164	0.260411	0.269423	0.22921	0.126087	0.283127	0.229474	0.344932	0.121971	0.234503	0.327487	0.386353	0.297408	0.06698	0.325473	0.280139	0.343239	0.127475		0.0305019	0.030502	0.030502	0.0642071	0.035211	0.0261638	0.0206938		0.0756204	0.0203687	0.058647	0.0499918	0.055357	0.0495367	0.024968
30	2	0.178944	0.262357	0.230111	0.23784	0.160393	0.273193	0.225412	0.347747	0.139127	0.24001	0.333583	0.374786	0.290398	0.061115	0.298173	0.309161	0.347034	0.106796		0.0303388	0.030339	0.030339	0.0651273	0.031582	0.0248899	0.0187328		0.0858567	0.0289765	0.047895	0.0407333	0.072095	0.0782232	0.024185
31	2.06667	0.176304	0.219828	0.249721	0.2237	0.140684	0.2846	0.216697	0.35835	0.131158	0.234584	0.332486	0.388132	0.299624	0.073306	0.31399	0.271394	0.324792	0.039783		0.0294912	0.029491	0.029491	0.0772928	0.031253	0.023641	0.0232237		0.0742403	0.0176825	0.055146	0.0464311	0.074749	0.073893	0.02497
32	2.13333	0.158119	0.20322	0.258213	0.215872	0.12166	0.284732	0.220461	0.35789	0.111929	0.231011	0.33215	0.371652	0.301683	0.05723	0.292586	0.324901	0.344856	0.037903		0.0337214	0.033721	0.033721	0.0747182	0.039415	0.0224051	0.0260545		0.0727823	0.0224169	0.050572	0.0332862	0.062934	0.071943	0.030704
33	2.2	0.185725	0.219727	0.254194	0.210256	0.138651	0.274306	0.214434	0.363328	0.107112	0.221494	0.328669	0.38716	0.313599	0.065164	0.282357	0.331532	0.338799	0.141032		0.02813	0.02813	0.02813	0.0630631	0.045773	0.029909	0.023634		0.0750047	0.0228962	0.05321	0.0306984	0.052427	0.0661189	0.031963
34	2.26667	0.184013	0.223571	0.255313	0.203811	0.151887	0.267103	0.22248	0.357663	0.102734	0.225142	0.327168	0.371727	0.31218	0.071266	0.272727	0.338918	0.334823	0.115058		0.0327869	0.032787	0.032787	0.0595287	0.036491	0.0206677	0.0249904		0.0865801	0.0250965	0.048395	0.0285274	0.058901	0.0723624	0.029336
35	2.33333	0.194404	0.237283	0.249354	0.201435	0.142273	0.266126	0.216819	0.356521	0.109232	0.22204	0.331572	0.367793	0.318594	0.04784	0.272271	0.34603	0.340583	0.124527		0.0363128	0.036313	0.036313	0.0687023	0.040334	0.0256558	0.0204805		0.0661091	0.019854	0.046615	0.0229875	0.078959	0.0660294	0.027126
36	2.4	0.189723	0.222621	0.255009	0.188635	0.114563	0.25463	0.233551	0.348429	0.091378	0.220862	0.321308	0.358699	0.304472	0.064335	0.246066	0.343655	0.312061	0.106587		0.036355	0.036355	0.036355	0.0659606	0.074793	0.02607	0.0256006		0.0799677	0.025028	0.052163	0.02475	0.073749	0.059775	0.023844
37	2.46667	0.187107	0.240925	0.249466	0.188884	0.121628	0.258269	0.221374	0.348969	0.092334	0.215925	0.326795	0.364916	0.297695	0.064897	0.265929	0.350192	0.324679	0.110945		0.0370117	0.037012	0.037012	0.0745891	0.05451	0.0234183	0.020529		0.0739666	0.0228274	0.060651	0.0235097	0.062614	0.0536001	0.023523
38	2.53333	0.179184	0.22869	0.256969	0.187134	0.128436	0.256502	0.233225	0.372316	0.113355	0.209887	0.32679	0.369469	0.296727	0.071165	0.23307	0.35476	0.310991	0.105721		0.0333204	0.03332	0.03332	0.0624066	0.056307	0.0224586	0.0226828		0.0660483	0.0198212	0.052889	0.0536647	0.077367	0.0608837	0.023837
39	2.6	0.176111	0.234556	0.244292	0.188644	0.117768	0.252651	0.234117	0.352609	0.100107	0.209429	0.332565	0.363983	0.283494	0.064846	0.249331	0.354775	0.284415	0.070926		0.0330954	0.033095	0.033095	0.0649351	0.039307	0.0196074	0.0251726		0.0571094	0.0196807	0.064417	0.0446742	0.064708	0.0524624	0.023352
40	2.66667	0.185469	0.228	0.228073	0.179133	0.101276	0.256368	0.245691	0.315877	0.10642	0.199692	0.32711	0.360474	0.289805	0.073088	0.224839	0.363886	0.290416	0.094175		0.0354324	0.035432	0.035432	0.0706426	0.030327	0.0253367	0.0218415		0.0825959	0.0242608	0.060006	0.0431303	0.093491	0.0573235	0.028667
41	2.73333	0.186554	0.229634	0.233812	0.187135	0.114355	0.265656	0.234693	0.288146	0.097963	0.196367	0.326846	0.365627	0.2823	0.05164	0.271635	0.365049	0.292534	0.114573		0.0294458	0.029446	0.029446	0.0682635	0.029808	0.0231118	0.0234072		0.0602087	0.0225008	0.072368	0.0740254	0.090065	0.0608358	0.026069
42	2.8	0.191518	0.232069	0.2213	0.181112	0.143088	0.264556	0.234664	0.318335	0.099711	0.208779	0.337398	0.348565	0.281337	0.058376	0.233698	0.357575	0.297858	0.097052		0.0363924	0.036392	0.036392	0.0777821	0.023353	0.0213804	0.0231101		0.0781313	0.0220294	0.048198	0.0333195	0.061256	0.060742	0.027809
43	2.86667	0.185547	0.231609	0.228814	0.180245	0.135806	0.260002	0.228948	0.285873	0.104557	0.203206	0.330542	0.36574	0.291726	0.076343	0.275349	0.356809	0.270185	0.137514		0.0376055	0.037606	0.037606	0.0685076	0.028066	0.0200568	0.0251276		0.0846052	0.0236541	0.078533	0.0544663	0.058099	0.0555994	0.02436
44	2.93333	0.182841	0.239228	0.239856	0.180783	0.151254	0.259394	0.244637	0.319874	0.092314	0.197909	0.315508	0.365356	0.282624	0.071401	0.24645	0.363687	0.292773	0.107478		0.0297988	0.029799	0.029799	0.0668836	0.04005	0.0208826	0.0247868		0.079827	0.0302229	0.07874	0.0380845	0.056536	0.0538542	0.025558
45	3	0.192934	0.228106	0.249136	0.182496	0.164793	0.248758	0.224561	0.30771	0.101888	0.196885	0.311609	0.387559	0.292329	0.056478	0.224708	0.360336	0.299975	0.111423		0.0371229	0.037123	0.037123	0.0620186	0.041992	0.0236928	0.0271423		0.0622034	0.0257162	0.06309	0.038871	0.064259	0.0678941	0.022493
46	3.06667	0.198233	0.241228	0.250778	0.181151	0.16249	0.250507	0.217094	0.304162	0.119209	0.20012	0.315587	0.347495	0.293241	0.067679	0.255257	0.362947	0.317537	0.071724		0.0381439	0.038144	0.038144	0.0738311	0.049473	0.0257637	0.0243902		0.067538	0.0218868	0.078776	0.049857	0.052221	0.0603054	0.025603
47	3.13333	0.207733	0.233979	0.258078	0.186885	0.151142	0.263239	0.218862	0.321736	0.141863	0.192781	0.31581	0.359157	0.297914	0.058804	0.272062	0.353452	0.283958	0.081399		0.0333592	0.033359	0.033359	0.0624576	0.041862	0.0230978	0.0252951		0.0643435	0.0252608	0.074204	0.037087	0.057899	0.0690296	0.02432
48	3.2	0.195446	0.236252	0.254397	0.180544	0.174369	0.243154	0.220779	0.275311	0.11038	0.200148	0.315671	0.368783	0.293744	0.042941	0.224806	0.356717	0.300164	0.085822		0.0380642	0.038064	0.038064	0.0761349	0.058507	0.0202522	0.0206759		0.0722109	0.0220067	0.086882	0.0529466	0.053266	0.0639142	0.022719
49	3.26667	0.19538	0.22679	0.237436	0.176197	0.190184	0.244879	0.217585	0.306292	0.128571	0.19776	0.300513	0.36999	0.307599	0.055234	0.218987	0.357842	0.292205	0.062285		0.0319653	0.031965	0.031965	0.06597	0.055577	0.0233191	0.0255732		0.0682631	0.0169184	0.075847	0.0545139	0.05363	0.0588484	0.025707
50	3.33333	0.203707	0.225725	0.238124	0.174446	0.17494	0.23863	0.2136	0.314238	0.101457	0.202634	0.306684	0.359387	0.289016	0.053813	0.244259	0.351142	0.316358	0.076584		0.0328879	0.032888	0.032888	0.0572671	0.054362	0.0209953	0.0245946		0.0851618	0.0209111	0.077975	0.0531151	0.064104	0.061418	0.027158
51	3.4	0.206754	0.230931	0.241901	0.18081	0.225788	0.253886	0.214971	0.294147	0.099198	0.210916	0.314353	0.352148	0.306406	0.054539	0.233615	0.352134	0.325365	0.096892		0.0311958	0.031196	0.031196	0.0595832	0.063098	0.0210317	0.0212766		0.0621212	0.0241009	0.064	0.0469524	0.063846	0.0661925	0.024731
52	3.46667	0.196224	0.236182	0.239333	0.186366	0.192926	0.261549	0.201549	0.283151	0.079777	0.218803	0.303312	0.356271	0.292271	0.048758	0.26396	0.36198	0.322577	0.063334		0.0323257	0.032326	0.032326	0.0650735	0.05247	0.0246679	0.0277067		0.0912911	0.0234938	0.08836	0.0514962	0.052105	0.0531646	0.027652
53	3.53333	0.19412	0.241423	0.245441	0.204807	0.169061	0.263622	0.203598	0.332605	0.047192	0.206864	0.292877	0.35836	0.287282	0.045697	0.279578	0.361436	0.336552	0.083719		0.0341036	0.034104	0.034104	0.0676234	0.077273	0.0225468	0.0251122		0.102213	0.0263158	0.077967	0.0482897	0.04599	0.0675452	0.030061
54	3.6	0.185172	0.238455	0.250855	0.215965	0.167809	0.246771	0.212459	0.344356	0.086455	0.196556	0.309781	0.366016	0.270169	0.070191	0.289024	0.344524	0.343342	0.09699		0.0357191	0.035719	0.035719	0.0676841	0.062403	0.0243174	0.0258039		0.0842883	0.0228379	0.076847	0.0554871	0.056464	0.0633609	0.025932
55	3.66667	0.185587	0.237783	0.26377	0.193111	0.185712	0.244868	0.201856	0.348953	0.090709	0.208546	0.324477	0.365414	0.263553	0.049347	0.297936	0.344102	0.356128	0.089196		0.0334898	0.03349	0.03349	0.0678879	0.057131	0.0249298	0.0272198		0.0963222	0.0278765	0.086502	0.0933752	0.049107	0.0736701	0.028713
56	3.73333	0.178343	0.247088	0.253475	0.238856	0.189001	0.24616	0.205155	0.357014	0.115711	0.207684	0.351695	0.358336	0.221284	0.071719	0.30332	0.341092	0.356745	0.070429		0.0359375	0.035938	0.035938	0.0613411	0.058292	0.026835	0.0230583		0.114872	0.0177127	0.076195	0.0644044	0.04159	0.0344958	0.024822
57	3.8	0.158509	0.238995	0.233495	0.23058	0.189881	0.251986	0.221107	0.374475	0.067246	0.213444	0.354582	0.370652	0.274502	0.061488	0.335587	0.345534	0.343968	0.024389		0.0330283	0.033028	0.033028	0.0620738	0.058232	0.0229743	0.0216786		0.109503	0.0223638	0.086301	0.0504523	0.045922	0.0354403	0.029342
58	3.86667	0.155262	0.242508	0.238589	0.242759	0.186686	0.23587	0.211743	0.400727	0.062442	0.221017	0.363683	0.377227	0.298015	0.070142	0.310727	0.340499	0.368876	0.021735		0.0307329	0.030733	0.030733	0.0622027	0.059015	0.026424	0.0237786		0.101267	0.0234427	0.090747	0.0672773	0.035049	0.0363519	0.028183
59	3.93333	0.161465	0.243636	0.239807	0.237646	0.153202	0.250259	0.181283	0.398381	0.064558	0.21005	0.364421	0.367274	0.289862	0.067827	0.29173	0.349621	0.371888	0.02085		0.0391553	0.039155	0.039155	0.0634343	0.041944	0.0298544	0.0219738		0.0969756	0.0491607	0.082437	0.0646651	0.036154	0.0343427	0.027075
60	4	0.156395	0.23725	0.239261	0.23417	0.18552	0.234775	0.197616	0.391779	0.065999	0.218361	0.369825	0.37645	0.286129	0.063155	0.34185	0.348678	0.359586	0.021699		0.0351562	0.035156	0.035156	0.0672581	0.045075	0.0235247	0.0247788		0.124117	0.0182598	0.068649	0.0332601	0.042011	0.0371079	0.032228
61	4.06667	0.187181	0.243785	0.246122	0.228648	0.195943	0.234627	0.211453	0.384182	0.082549	0.221861	0.370386	0.388442	0.28306	0.072193	0.386045	0.35587	0.371328	0.021081		0.035783	0.035783	0.035783	0.0606544	0.051356	0.0238095	0.0200067		0.110077	0.019145	0.060277	0.0434056	0.034673	0.0384343	0.02291
62	4.13333	0.164293	0.230434	0.243938	0.219332	0.180268	0.228091	0.209891	0.384595	0.090723	0.230068	0.369457	0.377864	0.292076	0.042869	0.365268	0.361229	0.361881	0.10562		0.0380878	0.038088	0.038088	0.068414	0.056752	0.023414	0.0243903		0.119727	0.015949	0.071047	0.0430516	0.030571	0.0411397	0.024182
63	4.2	0.191903	0.216039	0.242596	0.21542	0.175011	0.250719	0.216478	0.369873	0.059508	0.231682	0.370145	0.527418	0.287489	0.055779	0.388805	0.363283	0.363898	0.076698		0.0406954	0.040695	0.040695	0.0739527	0.053269	0.0267382	0.0209612		0.120816	0.0162009	0.059279	0.0494535	0.036967	0.0372154	0.024317
64	4.26667	0.249733	0.230374	0.246869	0.215273	0.175328	0.257003	0.215545	0.38492	0.069418	0.234217	0.364676	0.376122	0.253492	0.06161	0.350062	0.37281	0.361836	0.060217		0.0323861	0.032386	0.032386	0.082564	0.059641	0.0290133	0.0236434		0.0963749	0.0203252	0.050406	0.066023	0.055877	0.0327613	0.021792
65	4.33333	0.217528	0.238852	0.25433	0.211615	0.163908	0.258954	0.219361	0.385279	0.095157	0.255816	0.379236	0.379779	0.286656	0.056539	0.418927	0.35848	0.371506	0.088339		0.0368239	0.036824	0.036824	0.0675076	0.044083	0.0302233	0.0220529		0.109269	0.0176536	0.07962	0.0457125	0.038117	0.0351216	0.025974
66	4.4	0.184278	0.235821	0.268299	0.214893	0.153074	0.252331	0.235993	0.385114	0.064304	0.239838	0.382305	0.390831	0.27443	0.041311	0.404077	0.347496	0.379507	0.091015		0.037692	0.037692	0.037692	0.0627544	0.048798	0.0300187	0.019442		0.0836292	0.0120175	0.065527	0.063461	0.049248	0.0371654	0.024092
67	4.46667	0.182658	0.246212	0.268686	0.210566	0.118766	0.280973	0.237394	0.401684	0.084146	0.235261	0.393161	0.394514	0.238107	0.056749	0.367058	0.323231	0.36796	0.097947		0.0345888	0.034589	0.034589	0.0697702	0.045515	0.0301653	0.0256604		0.108182	0.0210765	0.055564	0.0592901	0.048874	0.0326069	0.024122
68	4.53333	0.187627	0.245756	0.243065	0.207801	0.167911	0.272981	0.230952	0.391476	0.08945	0.228798	0.395549	0.389852	0.251921	0.060712	0.40666	0.318874	0.369401	0.097869		0.0329412	0.032941	0.032941	0.0782478	0.045611	0.0343444	0.0232913		0.0696934	0.0222057	0.069945	0.0593264	0.042764	0.0341426	0.024711
69	4.6	0.186832	0.240142	0.232314	0.214349	0.143329	0.272644	0.235594	0.402955	0.062103	0.224431	0.385679	0.381351	0.25855	0.047381	0.412311	0.315087	0.371074	0.102053		0.0330478	0.033048	0.033048	0.0755903	0.049724	0.0317759	0.0235472		0.0607851	0.0151992	0.059293	0.0632348	0.048174	0.0320379	0.022282
70	4.66667	0.189627	0.253317	0.228133	0.208021	0.140819	0.262352	0.231429	0.385724	0.084072	0.217916	0.391992	0.390581	0.270422	0.0605	0.400484	0.32943	0.375753	0.090987		0.0321898	0.03219	0.03219	0.0893189	0.048013	0.0315403	0.0265873		0.0664207	0.0145382	0.057732	0.0611165	0.043315	0.0326209	0.0229
71	4.73333	0.186515	0.250683	0.23016	0.205911	0.160842	0.268595	0.229389	0.38271	0.072235	0.228816	0.400339	0.377745	0.266357	0.058372	0.390268	0.31528	0.376665	0.101749		0.032233	0.032233	0.032233	0.0842148	0.059373	0.0338852	0.0267823		0.0732472	0.0558542	0.053604	0.0580139	0.048184	0.0336357	0.020553
72	4.8	0.173063	0.243413	0.231734	0.196143	0.163397	0.236842	0.232722	0.384268	0.078716	0.227261	0.401414	0.378982	0.287081	0.051849	0.411302	0.314041	0.364779	0.11861		0.0350476	0.035048	0.035048	0.0897849	0.052246	0.0267118	0.0250616		0.0874432	0.0125923	0.0517	0.0616977	0.048412	0.0349906	0.02472
73	4.86667	0.195298	0.242467	0.236256	0.195612	0.120207	0.247163	0.229336	0.379913	0.08808	0.227515	0.400168	0.395256	0.285275	0.059583	0.402363	0.32102	0.380486	0.118777		0.0381355	0.038136	0.038136	0.0909838	0.050146	0.0332303	0.0260331		0.0548057	0.0163457	0.042157	0.0500679	0.05246	0.0385951	0.026604
74	4.93333	0.180511	0.251918	0.235149	0.198088	0.139494	0.251257	0.237931	0.383309	0.062589	0.236327	0.390841	0.395535	0.293764	0.061274	0.418354	0.327884	0.37616	0.080594		0.0332183	0.033218	0.033218	0.0821453	0.053921	0.0310602	0.0219691		0.0693878	0.0183939	0.042373	0.0270046	0.058713	0.0394804	0.023337
75	5	0.185327	0.245506	0.221811	0.206037	0.132891	0.251977	0.235252	0.383179	0.06324	0.233982	0.390743	0.391357	0.300542	0.077116	0.415047	0.328553	0.383025	0.071605		0.0323168	0.032317	0.032317	0.0755298	0.04449	0.0310291	0.0206376		0.0923121	0.0199704	0.030769	0.0476945	0.058801	0.0387049	0.027314
76	5.06667	0.197652	0.245558	0.23113	0.207004	0.1165	0.252004	0.237766	0.382754	0.057024	0.2094	0.404162	0.395828	0.295931	0.063934	0.390536	0.32945	0.391827	0.039968		0.0413534	0.041353	0.041353	0.0853175	0.054941	0.0280392	0.0214844		0.0861244	0.0119537	0.035655	0.054555	0.066769	0.0431533	0.021497
77	5.13333	0.210737	0.2511	0.235473	0.210443	0.106131	0.258211	0.225232	0.386406	0.069409	0.215946	0.406457	0.392784	0.285846	0.066241	0.41175	0.338465	0.393653	0.067532		0.0371088	0.037109	0.037109	0.0754403	0.053355	0.0262245	0.0220753		0.0802295	0.014333	0.062547	0.0347602	0.064969	0.0479081	0.032344
78	5.2	0.201851	0.257854	0.216578	0.211035	0.141373	0.258812	0.224575	0.379461	0.050963	0.21435	0.398621	0.401766	0.300435	0.055454	0.421913	0.337542	0.388328	0.078322		0.0323611	0.032361	0.032361	0.0765523	0.040653	0.0266409	0.024498		0.0873362	0.0160129	0.069326	0.0501264	0.072889	0.0512537	0.029529
79	5.26667	0.20605	0.254307	0.227069	0.202928	0.129784	0.261016	0.216223	0.372587	0.091519	0.211514	0.447953	0.398997	0.288802	0.057721	0.450993	0.304824	0.379046	0.060365		0.0286724	0.028672	0.028672	0.0687637	0.04758	0.0269637	0.0236175		0.0840267	0.0151637	0.055909	0.0623278	0.076034	0.0547219	0.03728
80	5.33333	0.215534	0.218473	0.225591	0.209198	0.111028	0.25293	0.227283	0.391691	0.088459	0.22533	0.514803	0.394052	0.289666	0.069137	0.47837	0.299818	0.382861	0.093288		0.0270701	0.02707	0.02707	0.0581484	0.048079	0.0280648	0.0228958		0.0740615	0.0133333	0.061453	0.0722815	0.067066	0.0512922	0.041572
81	5.4	0.211319	0.219283	0.222635	0.214397	0.120642	0.250452	0.223223	0.392751	0.069989	0.23205	0.60696	0.391414	0.284501	0.067494	0.43589	0.303242	0.380172	0.060015		0.0334948	0.033495	0.033495	0.0579901	0.04536	0.026221	0.0224168		0.0614945	0.0137378	0.061908	0.0139241	0.069473	0.042713	0.037628
82	5.46667	0.21106	0.243035	0.223356	0.209997	0.123668	0.251666	0.226017	0.399387	0.054771	0.237604	0.661139	0.388852	0.265376	0.063541	0.499083	0.33563	0.378376	0.092308		0.0297767	0.029777	0.029777	0.0579832	0.041216	0.0279823	0.0241494		0.0805327	0.0133482	0.071745	0.0546087	0.054021	0.0411787	0.042298
83	5.53333	0.208047	0.24432	0.224715	0.209309	0.123242	0.24837	0.207543	0.404183	0.065037	0.246705	0.76971	0.408898	0.283838	0.058424	0.53101	0.341161	0.36822	0.059222		0.0308862	0.030886	0.030886	0.0626069	0.039537	0.0308387	0.0251164		0.0836022	0.029992	0.083649	0.0309647	0.068692	0.0416285	0.025256
84	5.6	0.208203	0.245682	0.221741	0.216903	0.130219	0.245661	0.211563	0.405635	0.068691	0.237849	0.815273	0.388802	0.271432	0.063022	0.524694	0.344262	0.362354	0.058774		0.0297121	0.029712	0.029712	0.0660651	0.039232	0.0273438	0.0252696		0.0966975	0.02782	0.07393	0.0456656	0.061894	0.0434783	0.042052
85	5.66667	0.213626	0.238683	0.216811	0.225013	0.125037	0.240082	0.193878	0.410194	0.08365	0.221957	0.719522	0.385688	0.280806	0.057077	0.540744	0.34985	0.344739	0.088613		0.0269172	0.026917	0.026917	0.0553186	0.045266	0.0275645	0.025923		0.0733678	0.028418	0.082474	0.0348028	0.053973	0.0489515	0.038854
86	5.73333	0.206183	0.23119	0.216618	0.220067	0.118779	0.245003	0.205635	0.422677	0.074418	0.223303	0.366736	0.377243	0.274415	0.059649	0.573844	0.360762	0.343535	0.068908		0.0314685	0.031469	0.031469	0.055345	0.035805	0.0271273	0.0221445		0.0903277	0.100272	0.068087	0.0489369	0.067399	0.0590144	0.036186
87	5.8	0.202245	0.243248	0.208419	0.227611	0.118468	0.232826	0.190348	0.451744	0.049719	0.240854	0.366427	0.373959	0.274768	0.043412	0.602878	0.361369	0.354629	0.09711		0.0261923	0.026192	0.026192	0.0687923	0.052632	0.0312619	0.017124		0.0852103	0.085149	0.061096	0.0377359	0.058296	0.0476457	0.032986
88	5.86667	0.2041	0.237567	0.209741	0.236488	0.149977	0.229742	0.178761	0.516586	0.06137	0.221091	0.3773	0.380045	0.274071	0.066192	0.621783	0.367353	0.353659	0.074693		0.0315118	0.031512	0.031512	0.0762641	0.042343	0.0315831	0.0222481		0.0690642	0.086735	0.064199	0.0368932	0.061326	0.0441289	0.030044
89	5.93333	0.204496	0.241154	0.213788	0.232303	0.195259	0.236485	0.183458	0.505613	0.0625	0.18941	0.36455	0.367471	0.283034	0.070675	0.763363	0.373228	0.366558	0.06385		0.0283298	0.02833	0.02833	0.0736532	0.039463	0.0294865	0.0209107		0.0933578	0.094358	0.060738	0.0342973	0.059658	0.0674774	0.032406
90	6	0.208748	0.230859	0.203399	0.242194	0.183838	0.24254	0.199864	0.57152	0.085815	0.215901	0.368359	0.372506	0.283586	0.093359	0.523811	0.367663	0.348032	0.066899		0.0218287	0.021829	0.021829	0.0726214	0.044061	0.0313234	0.022964		0.088935	0.092692	0.060629	0.0299579	0.066698	0.0684863	0.032132
91	6.06667	0.202622	0.229877	0.211963	0.241819	0.172298	0.232933	0.189734	0.617654	0.074917	0.220711	0.361672	0.373774	0.2675	0.066015	0.424753	0.371855	0.340343	0.094579		0.0262637	0.026264	0.026264	0.0813901	0.053955	0.0335599	0.0251397		0.0843552	0.094578	0.04998	0.031213	0.088209	0.0659548	0.035714
92	6.13333	0.203263	0.209762	0.215964	0.244012	0.223379	0.230558	0.18864	0.676723	0.046666	0.218023	0.360692	0.382568	0.276852	0.051767	0.424241	0.357637	0.363275	0.106531		0.0334677	0.033468	0.033468	0.0712296	0.053165	0.0295084	0.0220643		0.0861795	0.091151	0.075186	0.0347135	0.071	0.0668127	0.029538
93	6.2	0.211706	0.212914	0.216098	0.250717	0.197098	0.231802	0.208001	0.585954	0.057569	0.227936	0.367224	0.365467	0.273221	0.066638	0.58363	0.359649	0.356438	0.100847		0.0324149	0.032415	0.032415	0.0711708	0.053504	0.0314378	0.0268465		0.11007	0.091156	0.041654	0.0352113	0.084674	0.0688202	0.035527
94	6.26667	0.211941	0.209833	0.215964	0.257619	0.193759	0.23643	0.196876	0.628382	0.051002	0.229775	0.359087	0.366491	0.263271	0.061893	0.582623	0.350585	0.355818	0.100577		0.0248521	0.024852	0.024852	0.0826215	0.052035	0.0290193	0.0217651		0.0804701	0.109621	0.070627	0.0379353	0.084366	0.04978	0.031614
95	6.33333	0.190945	0.201524	0.214763	0.247792	0.226408	0.228284	0.19228	0.605184	0.078019	0.203985	0.378737	0.346944	0.267388	0.062586	0.331227	0.354167	0.336169	0.102016		0.033002	0.033002	0.033002	0.0659334	0.049981	0.0252535	0.0266694		0.0614525	0.085133	0.064187	0.0359859	0.083603	0.0431781	0.032669
96	6.4	0.193712	0.210475	0.213303	0.250253	0.238598	0.230595	0.189458	0.632064	0.043083	0.217354	0.364736	0.341735	0.277546	0.043772	0.253259	0.356358	0.335934	0.092616		0.0294802	0.02948	0.02948	0.0780512	0.057312	0.0326476	0.0219522		0.0641778	0.090558	0.079037	0.0330694	0.108579	0.0379165	0.031111
97	6.46667	0.192937	0.203538	0.21554	0.243349	0.261273	0.236505	0.198952	0.712663	0.069574	0.228524	0.351375	0.379662	0.274426	0.079777	0.372787	0.350179	0.31614	0.087813		0.0278219	0.027822	0.027822	0.0751121	0.063861	0.0279372	0.020985		0.0678986	0.086724	0.06264	0.0345729	0.096116	0.0316262	0.030612
98	6.53333	0.198167	0.213362	0.21278	0.227217	0.210098	0.233585	0.181383	0.791468	0.084106	0.22975	0.360134	0.34934	0.287987	0.066804	0.394361	0.360788	0.341411	0.072522		0.0348195	0.03482	0.03482	0.0746919	0.056684	0.0296894	0.0259291		0.106895	0.097145	0.063789	0.0360067	0.079255	0.0326954	0.02927
99	6.6	0.198482	0.239163	0.214085	0.235374	0.166228	0.231919	0.188007	0.754681	0.065408	0.230053	0.346405	0.341902	0.269444	0.052716	0.383606	0.360419	0.346594	0.065732		0.0254188	0.025419	0.025419	0.0824403	0.050919	0.0282699	0.025248		0.0699433	0.082258	0.069364	0.0359826	0.085043	0.0319439	0.030066
100	6.66667	0.202249	0.224464	0.224015	0.232031	0.166222	0.231479	0.191271	0.863883	0.069581	0.240258	0.357608	0.375101	0.284654	0.070747	0.372018	0.363428	0.347945	0.089669		0.031371	0.031371	0.031371	0.0899164	0.05331	0.0285388	0.0237624		0.121029	0.079151	0.074148	0.0464295	0.093532	0.0304834	0.029881
101	6.73333	0.195714	0.223494	0.221686	0.224215	0.202336	0.218972	0.201496	0.819327	0.061183	0.240716	0.349027	0.349022	0.280664	0.0609	0.336604	0.371245	0.358257	0.085276		0.0328647	0.032865	0.032865	0.080117	0.059826	0.0262138	0.0215716		0.121816	0.091014	0.073076	0.0581923	0.085828	0.0281109	0.032056
102	6.8	0.200693	0.209029	0.225506	0.213424	0.169503	0.224633	0.192704	0.845267	0.069925	0.243394	0.330021	0.377334	0.299487	0.066141	0.320943	0.369347	0.379091	0.093962		0.0324111	0.032411	0.032411	0.0882618	0.067126	0.0255814	0.0232908		0.103413	0.077145	0.065706	0.0508923	0.087168	0.0330951	0.036283
103	6.86667	0.203083	0.253605	0.232302	0.208427	0.185091	0.221756	0.206764	0.739318	0.058808	0.238986	0.331277	0.395184	0.305476	0.061939	0.27383	0.377379	0.386239	0.060019		0.029707	0.029707	0.029707	0.0886887	0.060872	0.0262957	0.0230129		0.111993	0.066642	0.039442	0.0561118	0.097264	0.0344183	0.028496
104	6.93333	0.193855	0.269154	0.238811	0.209423	0.155669	0.221998	0.219584	0.284105	0.052342	0.236399	0.343045	0.372545	0.295765	0.059898	0.259477	0.372093	0.380065	0.101146		0.0232737	0.023274	0.023274	0.0874828	0.062968	0.0255517	0.0284657		0.0978723	0.079725	0.033691	0.0414986	0.07473	0.0323155	0.032492
105	7	0.203719	0.266526	0.235593	0.202169	0.16644	0.226473	0.213785	0.294391	0.047517	0.236422	0.352295	0.35434	0.292288	0.059025	0.273631	0.378551	0.392816	0.097435		0.0232608	0.023261	0.023261	0.0685625	0.0672	0.0269781	0.0238501		0.105499	0.060922	0.029367	0.0140205	0.06261	0.0375427	0.029391
106	7.06667	0.196751	0.259938	0.224527	0.189683	0.161209	0.221738	0.208992	0.261809	0.082192	0.242391	0.361045	0.344505	0.292117	0.06308	0.311885	0.372809	0.393163	0.07		0.0274848	0.027485	0.027485	0.0826972	0.067837	0.0265739	0.0214955		0.103764	0.055881	0.065249	0.0265252	0.066912	0.0442683	0.031543
107	7.13333	0.188328	0.265262	0.235134	0.206154	0.11095	0.215562	0.21056	0.233091	0.059904	0.235055	0.354925	0.375638	0.297536	0.063974	0.343863	0.363989	0.390375	0.095038		0.0288453	0.028845	0.028845	0.0703606	0.051811	0.0263181	0.02574		0.107039	0.055768	0.053824	0.023166	0.065712	0.0394939	0.037505
108	7.2	0.192308	0.270089	0.25273	0.205578	0.126177	0.219797	0.211395	0.227836	0.057561	0.228277	0.357948	0.354816	0.300324	0.04772	0.369727	0.352914	0.404545	0.08695		0.0338322	0.033832	0.033832	0.0689655	0.048793	0.0272866	0.0190049		0.10689	0.057031	0.073386	0.0360558	0.074398	0.0413501	0.033638
109	7.26667	0.193424	0.264004	0.234182	0.212227	0.118921	0.222722	0.205221	0.229888	0.034535	0.23523	0.366277	0.365779	0.28038	0.065708	0.372324	0.339298	0.392251	0.102471		0.0306651	0.030665	0.030665	0.0898159	0.047253	0.026377	0.0271242		0.102217	0.061275	0.070401	0.0543418	0.070197	0.0362053	0.032591
110	7.33333	0.179525	0.280286	0.229181	0.209782	0.128382	0.222393	0.201195	0.21078	0.065156	0.222496	0.367413	0.35167	0.259197	0.056956	0.371537	0.319132	0.40848	0.079519		0.0268919	0.026892	0.026892	0.0731263	0.040377	0.0271493	0.0208357		0.0827261	0.058218	0.065277	0.0451958	0.075301	0.0351555	0.030315
111	7.4	0.182934	0.283608	0.235655	0.21432	0.081351	0.222676	0.210501	0.25113	0.042695	0.229994	0.395582	0.356963	0.255774	0.060268	0.347653	0.331183	0.409361	0.109484		0.027922	0.027922	0.027922	0.0818861	0.040085	0.0229304	0.0252266		0.104298	0.060646	0.040819	0.0390585	0.068283	0.0328439	0.034477
112	7.46667	0.181989	0.30345	0.239691	0.219708	0.131971	0.223691	0.204326	0.267483	0.076305	0.22385	0.371653	0.365019	0.257486	0.056024	0.342772	0.334106	0.405305	0.10575		0.0320528	0.032053	0.032053	0.0728713	0.045185	0.0228432	0.0245468		0.0994375	0.052149	0.065327	0.0335747	0.065885	0.0353137	0.032054
113	7.53333	0.186914	0.302001	0.239781	0.216688	0.119734	0.221948	0.208975	0.260226	0.042755	0.224368	0.351617	0.347998	0.273951	0.059142	0.327003	0.337596	0.410391	0.11062		0.0320672	0.032067	0.032067	0.0607566	0.048347	0.0245114	0.0224159		0.114766	0.056475	0.067995	0.0359408	0.051141	0.0373932	0.031903
114	7.6	0.179779	0.261947	0.244119	0.236657	0.114646	0.214403	0.205759	0.313235	0.0491	0.22164	0.366776	0.357342	0.267603	0.068313	0.319023	0.341051	0.407861	0.081946		0.0245041	0.024504	0.024504	0.0637801	0.04944	0.0277885	0.0266158		0.0922465	0.06298	0.039841	0.0638298	0.048808	0.0353569	0.028306
115	7.66667	0.174102	0.250337	0.2316	0.238933	0.11482	0.20591	0.205576	0.344394	0.060571	0.220481	0.371325	0.352552	0.263332	0.053603	0.329609	0.350035	0.415714	0.111321		0.0302801	0.03028	0.03028	0.0563013	0.046065	0.0271003	0.0285171		0.0936344	0.057361	0.058206	0.0502818	0.067096	0.0364786	0.033748
116	7.73333	0.167784	0.248653	0.222008	0.245325	0.119727	0.203567	0.212485	0.352389	0.076154	0.214	0.380043	0.36067	0.274379	0.079396	0.334519	0.341865	0.404808	0.135438		0.03125	0.03125	0.03125	0.0616997	0.041818	0.0297348	0.028133		0.104858	0.049893	0.058175	0.0366592	0.047395	0.0393029	0.035259
117	7.8	0.174182	0.253593	0.187618	0.252956	0.120085	0.203626	0.212526	0.334371	0.049194	0.221064	0.381054	0.361357	0.295404	0.048744	0.331674	0.332737	0.417491	0.111967		0.0267123	0.026712	0.026712	0.0538368	0.050616	0.029321	0.0275624		0.105473	0.045895	0.039908	0.0413875	0.052341	0.0366345	0.030029
118	7.86667	0.167384	0.261288	0.226625	0.240433	0.106291	0.206616	0.215758	0.326337	0.076923	0.215097	0.378496	0.360315	0.30093	0.065988	0.310436	0.335561	0.391844	0.079197		0.0312634	0.031263	0.031263	0.0526796	0.041944	0.0292623	0.0253944		0.0834915	0.04302	0.041943	0.070302	0.060482	0.0264668	0.03384
119	7.93333	0.168159	0.249957	0.182055	0.236919	0.120429	0.211957	0.229895	0.302447	0.054971	0.205137	0.390004	0.354714	0.320503	0.042646	0.326875	0.339854	0.399199	0.103966		0.0257229	0.025723	0.025723	0.0432638	0.045805	0.034384	0.0224591		0.0806315	0.046626	0.056525	0.0573614	0.060582	0.0233403	0.034917
120	8	0.161948	0.255768	0.225512	0.240687	0.130235	0.211986	0.238962	0.307402	0.057604	0.203403	0.396237	0.353414	0.305622	0.060505	0.310356	0.336898	0.408113	0.133372		0.0279052	0.027905	0.027905	0.0607466	0.058777	0.0276372	0.022886		0.0698559	0.043341	0.064902	0.0328947	0.060676	0.0252087	0.037
121	8.06667	0.16877	0.253407	0.223258	0.233639	0.098299	0.197748	0.224561	0.285197	0.06032	0.209654	0.402039	0.358509	0.289217	0.050716	0.310814	0.347475	0.384555	0.090909		0.0293332	0.029333	0.029333	0.0440826	0.052735	0.0276039	0.029147		0.0669201	0.048547	0.070394	0.0406087	0.059441	0.0187094	0.026447
122	8.13333	0.167092	0.243216	0.231984	0.233822	0.115846	0.19697	0.219614	0.283032	0.065918	0.207444	0.389613	0.35158	0.286138	0.042312	0.296624	0.316231	0.390933	0.135186		0.0305677	0.030568	0.030568	0.0460148	0.04396	0.0299378	0.0241467		0.0883955	0.046783	0.075286	0.0427318	0.060052	0.0243069	0.030102
123	8.2	0.166809	0.24293	0.23648	0.24834	0.13584	0.199428	0.216104	0.245664	0.06005	0.214546	0.396033	0.359669	0.285119	0.051782	0.28798	0.338204	0.37958	0.096871		0.0312455	0.031246	0.031246	0.0510052	0.041973	0.0258472	0.024389		0.0958506	0.049948	0.07908	0.046539	0.060769	0.0170584	0.03046
124	8.26667	0.166497	0.234619	0.234956	0.242075	0.120133	0.198536	0.200611	0.272631	0.043478	0.200911	0.387106	0.364108	0.280296	0.069969	0.29777	0.324623	0.387082	0.005469		0.0238645	0.023865	0.023865	0.0527493	0.055261	0.0262245	0.0245041		0.0747171	0.051302	0.065471	0.0366445	0.057246	0.0154234	0.02709
125	8.33333	0.165453	0.228267	0.234889	0.240107	0.117532	0.207779	0.221945	0.250343	0.056359	0.210289	0.394554	0.367424	0.278719	0.054627	0.288487	0.311933	0.380648	0.017388		0.0291224	0.029122	0.029122	0.0596138	0.055432	0.0309577	0.0232697		0.0972951	0.054697	0.063034	0.0290446	0.048918	0.0168004	0.031391
126	8.4	0.167965	0.229323	0.247424	0.23651	0.132071	0.215901	0.227294	0.263227	0.063739	0.205107	0.389208	0.367625	0.275768	0.051648	0.298221	0.302445	0.392554	0.085746		0.0343884	0.034388	0.034388	0.0449735	0.050562	0.0262678	0.0275069		0.097464	0.051684	0.065352	0.0229582	0.052494	0.0195874	0.033634
127	8.46667	0.169425	0.229753	0.204134	0.241054	0.095011	0.221013	0.224175	0.29676	0.068423	0.211869	0.377259	0.375412	0.269773	0.053868	0.298036	0.303718	0.373677	0.130113		0.0300145	0.030015	0.030015	0.064154	0.041389	0.0253313	0.024535		0.071618	0.055972	0.074883	0.0365073	0.046403	0.0179029	0.032541
128	8.53333	0.172714	0.229909	0.217601	0.249049	0.112699	0.219879	0.221466	0.304705	0.041879	0.197615	0.358082	0.378925	0.27332	0.060041	0.296699	0.305354	0.379825	0.104607		0.0291978	0.029198	0.029198	0.0462644	0.057532	0.0269648	0.022891		0.0689397	0.063579	0.054441	0.0357908	0.048054	0.0173119	0.033219
129	8.6	0.161004	0.22935	0.203175	0.256249	0.12499	0.215801	0.230415	0.314598	0.052348	0.202177	0.351178	0.385594	0.233891	0.054848	0.291025	0.273535	0.370571	0.102005		0.0321414	0.032141	0.032141	0.0604226	0.049226	0.0262812	0.0241271		0.0830969	0.076698	0.067019	0.0381247	0.05653	0.0179305	0.032142
130	8.66667	0.164925	0.23073	0.209472	0.249936	0.159439	0.214086	0.225972	0.311334	0.056954	0.192559	0.369194	0.352934	0.23156	0.062679	0.273966	0.284483	0.381485	0.125568		0.0318521	0.031852	0.031852	0.057009	0.055626	0.0267069	0.0248791		0.0627615	0.069607	0.056841	0.0378214	0.051241	0.0166882	0.033704
131	8.73333	0.170327	0.232175	0.224204	0.256363	0.116555	0.225587	0.222842	0.278667	0.051226	0.190705	0.364865	0.351061	0.222669	0.058767	0.282643	0.304559	0.380385	0.121557		0.0233827	0.023383	0.023383	0.0598095	0.043935	0.029732	0.0275932		0.0636028	0.073149	0.077879	0.0587888	0.055515	0.0157054	0.02966
132	8.8	0.168292	0.231704	0.211721	0.264083	0.149224	0.221146	0.212358	0.26961	0.053392	0.204949	0.354075	0.339076	0.249023	0.05488	0.289	0.322569	0.375852	0.100386		0.0285312	0.028531	0.028531	0.0552685	0.061641	0.0272586	0.0229117		0.0633264	0.079158	0.053742	0.0728424	0.054125	0.0177585	0.028111
133	8.86667	0.171684	0.243428	0.207733	0.259298	0.172154	0.224391	0.221177	0.282305	0.05127	0.187024	0.350908	0.343316	0.249812	0.052568	0.291437	0.338954	0.368187	0.123886		0.0283477	0.028348	0.028348	0.0441155	0.053999	0.0306845	0.0233746		0.0799652	0.081225	0.070936	0.0410298	0.048927	0.0163107	0.033422
134	8.93333	0.167623	0.240503	0.209389	0.26321	0.185438	0.220386	0.217441	0.286378	0.068497	0.194493	0.357071	0.350992	0.258639	0.078218	0.29979	0.346164	0.367865	0.068582		0.0358686	0.035869	0.035869	0.055671	0.063606	0.0278219	0.0238939		0.0650935	0.080332	0.064791	0.0353823	0.058906	0.0174981	0.030221
135	9	0.167394	0.234764	0.220945	0.272607	0.184464	0.220394	0.214902	0.311697	0.074866	0.188472	0.336541	0.344926	0.266108	0.068081	0.27342	0.349717	0.347311	0.086062		0.0311538	0.031154	0.031154	0.0549174	0.061395	0.0284934	0.0245549		0.0801572	0.103766	0.05883	0.0450038	0.05447	0.0152687	0.026569
136	9.06667	0.175018	0.243465	0.213333	0.262618	0.170297	0.223358	0.202725	0.313004	0.054789	0.188327	0.334896	0.364249	0.261335	0.055693	0.2906	0.320554	0.374169	0.094227		0.032377	0.032377	0.032377	0.0467128	0.06013	0.027205	0.0197383		0.0568133	0.093573	0.056204	0.0386721	0.064418	0.0162728	0.031563
137	9.13333	0.182501	0.232561	0.204	0.269284	0.183523	0.233762	0.188593	0.325214	0.095329	0.190391	0.33336	0.354089	0.257953	0.041118	0.246857	0.320081	0.356234	0.106266		0.038839	0.038839	0.038839	0.0565815	0.062094	0.0248027	0.0205599		0.0847584	0.100401	0.07035	0.0395517	0.060592	0.0184169	0.028121
138	9.2	0.176083	0.233873	0.207758	0.280145	0.139064	0.233624	0.21473	0.323661	0.051335	0.192841	0.33641	0.35769	0.265386	0.061724	0.246845	0.31404	0.324902	0.085876		0.0286275	0.028628	0.028628	0.0583751	0.047319	0.0279395	0.0198095		0.0831565	0.108187	0.039514	0.0418193	0.059544	0.0180605	0.030078
139	9.26667	0.170746	0.23308	0.215866	0.278353	0.128224	0.240078	0.216563	0.319364	0.0596	0.188776	0.338737	0.366823	0.259492	0.063138	0.24463	0.306135	0.304411	0.076569		0.0325872	0.032587	0.032587	0.0488091	0.040969	0.0350195	0.0247425		0.0675513	0.12319	0.052161	0.0363841	0.052285	0.0192308	0.027982
140	9.33333	0.170333	0.235442	0.21344	0.289176	0.119472	0.228752	0.217616	0.328456	0.061743	0.189534	0.337332	0.359554	0.240961	0.065268	0.264629	0.312099	0.285419	0.13856		0.0324484	0.032448	0.032448	0.0506173	0.038242	0.0307923	0.0269815		0.0681431	0.135047	0.074988	0.0461483	0.061066	0.016869	0.031407
141	9.4	0.16972	0.211198	0.211581	0.275325	0.14678	0.236089	0.208452	0.319798	0.060315	0.187615	0.351411	0.35566	0.235283	0.068215	0.251192	0.318762	0.295762	0.122645		0.0271241	0.027124	0.027124	0.0495695	0.041884	0.0280336	0.0246156		0.0724	0.129168	0.056152	0.0474041	0.055431	0.0177428	0.028099
142	9.46667	0.164799	0.214745	0.2022	0.28975	0.136106	0.24398	0.189935	0.322516	0.052143	0.19514	0.334714	0.359592	0.233079	0.046247	0.239465	0.306378	0.302679	0.147409		0.0360784	0.036078	0.036078	0.0467961	0.038051	0.0259605	0.0244685		0.0745946	0.135011	0.057912	0.0585881	0.055939	0.0164157	0.030303
143	9.53333	0.163339	0.217845	0.2088	0.282565	0.137866	0.245806	0.188549	0.321792	0.067811	0.187615	0.33331	0.345047	0.239681	0.062197	0.254711	0.33541	0.286378	0.096557		0.0390466	0.039047	0.039047	0.0545145	0.039774	0.0259842	0.0265679		0.0598697	0.099946	0.061115	0.0670842	0.060715	0.0165187	0.028539
144	9.6	0.160761	0.215725	0.209734	0.277331	0.136261	0.25529	0.181339	0.313396	0.050821	0.203843	0.326812	0.348242	0.237212	0.056891	0.251854	0.332277	0.278464	0.092562		0.0346271	0.034627	0.034627	0.046286	0.035901	0.0266059	0.0233159		0.0698948	0.095123	0.03924	0.0381471	0.047961	0.0156848	0.027829
145	9.66667	0.156098	0.212072	0.210292	0.284085	0.152303	0.268464	0.172683	0.309714	0.07293	0.214865	0.339332	0.354365	0.219735	0.054514	0.270444	0.34873	0.269339	0.098545		0.0495022	0.049502	0.049502	0.0541107	0.051024	0.0259172	0.0210827		0.0874387	0.064097	0.053086	0.0592171	0.065388	0.0144444	0.030892
146	9.73333	0.15718	0.213197	0.210918	0.300512	0.117481	0.276171	0.176533	0.314826	0.045584	0.199545	0.350103	0.352149	0.236695	0.072657	0.284029	0.355635	0.273713	0.089478		0.0381373	0.038137	0.038137	0.057664	0.04835	0.0262948	0.0220688		0.0469446	0.056434	0.03834	0.0471992	0.065057	0.0154076	0.027956
147	9.8	0.159129	0.209206	0.203462	0.306421	0.125063	0.277387	0.184665	0.29925	0.038775	0.199477	0.343941	0.344312	0.24072	0.078612	0.290014	0.362876	0.273349	0.108515		0.0351573	0.035157	0.035157	0.0638588	0.057166	0.0264	0.0235556		0.0694981	0.064476	0.032148	0.0517056	0.055986	0.0142479	0.03504
148	9.86667	0.159843	0.206834	0.21451	0.305063	0.146055	0.264655	0.188383	0.283568	0.064975	0.193835	0.355091	0.335941	0.24659	0.07821	0.289623	0.369907	0.317178	0.127547		0.0260973	0.026097	0.026097	0.0711396	0.04356	0.0220994	0.0228942		0.0632253	0.065023	0.049402	0.046677	0.054337	0.0105581	0.03025
149	9.93333	0.15645	0.204091	0.20612	0.302762	0.128711	0.256087	0.209893	0.300574	0.056437	0.187486	0.364858	0.335851	0.228361	0.088005	0.306419	0.369033	0.330083	0.097996		0.0331419	0.033142	0.033142	0.0632768	0.053003	0.0244044	0.0213311		0.0868768	0.060152	0.03268	0.0339179	0.059938	0.0138835	0.032622
150	10	0.156754	0.200973	0.206605	0.316437	0.112555	0.267918	0.201179	0.293504	0.058779	0.178118	0.350372	0.329777	0.234753	0.084039	0.316455	0.35658	0.346623	0.107649		0.0388507	0.038851	0.038851	0.0620018	0.04187	0.0221662	0.028607		0.0678879	0.059924	0.039088	0.0325934	0.061201	0.0167075	0.03289
151	10.0667	0.159261	0.204856	0.21343	0.324028	0.093255	0.265591	0.184564	0.295189	0.057872	0.183364	0.302926	0.333104	0.22891	0.090783	0.319581	0.353835	0.29201	0.152958		0.0316706	0.031671	0.031671	0.0616465	0.030149	0.0249671	0.0236593		0.0782773	0.056705	0.052009	0.02868	0.053361	0.0135467	0.03357
152	10.1333	0.159767	0.194119	0.203402	0.329415	0.15188	0.261557	0.190888	0.293118	0.048481	0.186203	0.229008	0.332616	0.242555	0.090735	0.321704	0.330995	0.273948	0.108953		0.032491	0.032491	0.032491	0.068124	0.031454	0.0253613	0.0269388		0.0708663	0.055839	0.060908	0.020461	0.055941	0.0113185	0.029541
153	10.2	0.151736	0.19252	0.196975	0.331802	0.162496	0.268345	0.194168	0.286557	0.067251	0.19705	0.319392	0.334498	0.255214	0.093397	0.30415	0.331955	0.326268	0.118894		0.0311883	0.031188	0.031188	0.0682985	0.032794	0.0248325	0.0257711		0.0719652	0.060129	0.059914	0.0427839	0.058772	0.0127466	0.02642
154	10.2667	0.153719	0.196507	0.197997	0.34018	0.132727	0.241379	0.186886	0.281818	0.047902	0.2	0.32769	0.325002	0.266112	0.096811	0.319594	0.32522	0.34653	0.116023		0.0323686	0.032369	0.032369	0.0619875	0.033938	0.0266536	0.0241661		0.0554682	0.056699	0.051819	0.0364814	0.061804	0.0136986	0.031061
155	10.3333	0.145089	0.19675	0.198359	0.340396	0.139191	0.23689	0.197533	0.289188	0.06919	0.19817	0.323056	0.324481	0.242794	0.096168	0.297277	0.332232	0.313157	0.165978		0.0389984	0.038998	0.038998	0.0575275	0.045351	0.0290698	0.024827		0.0667787	0.06237	0.05861	0.0345798	0.068416	0.0139228	0.03226
156	10.4	0.16456	0.199433	0.194759	0.345209	0.131441	0.247067	0.193596	0.291697	0.049372	0.198914	0.310424	0.326794	0.239696	0.096404	0.290249	0.316238	0.319557	0.123799		0.029886	0.029886	0.029886	0.0589922	0.041546	0.0300517	0.0214039		0.0673848	0.052237	0.071531	0.0301027	0.061593	0.011355	0.02962
157	10.4667	0.156465	0.193951	0.18684	0.342553	0.137666	0.247944	0.196376	0.306346	0.047027	0.189695	0.311272	0.316049	0.243265	0.097467	0.288387	0.317524	0.317647	0.067846		0.0289338	0.028934	0.028934	0.0722892	0.029163	0.0286938	0.0221066		0.0546122	0.051292	0.046135	0.0267531	0.065743	0.0119561	0.029478
158	10.5333	0.160811	0.201473	0.192358	0.345633	0.141782	0.250202	0.199187	0.302384	0.06083	0.1966	0.311576	0.324294	0.222155	0.086177	0.282774	0.314197	0.320764	0.10861		0.0335393	0.033539	0.033539	0.0712725	0.038634	0.0369124	0.0224571		0.07125	0.054616	0.04523	0.0467252	0.061273	0.0116419	0.031707
159	10.6	0.154189	0.196475	0.191781	0.332771	0.15808	0.246921	0.19945	0.310982	0.045131	0.198318	0.319732	0.318577	0.213623	0.074116	0.267838	0.307951	0.342594	0.142857		0.0330319	0.033032	0.033032	0.0688109	0.044164	0.0288731	0.0232115		0.0643075	0.058721	0.047587	0.0433093	0.061748	0.0106607	0.026859
160	10.6667	0.154699	0.187201	0.185076	0.320769	0.167818	0.242676	0.198622	0.299341	0.044762	0.189872	0.315822	0.320148	0.253341	0.089078	0.251217	0.307311	0.366827	0.163027		0.0381326	0.038133	0.038133	0.0602549	0.037022	0.0348866	0.0241646		0.0511663	0.048696	0.051424	0.0355017	0.082608	0.0107751	0.028681
161	10.7333	0.155814	0.178307	0.188971	0.309243	0.151899	0.250464	0.20474	0.307436	0.051805	0.188275	0.324141	0.332869	0.21569	0.078246	0.254543	0.320262	0.363583	0.121659		0.0315387	0.031539	0.031539	0.0582451	0.041981	0.0325655	0.0226562		0.0763042	0.049652	0.066631	0.0390625	0.077677	0.0140273	0.026732
162	10.8	0.156531	0.17773	0.182489	0.314693	0.117932	0.252911	0.202193	0.318546	0.043574	0.200375	0.320993	0.332624	0.216442	0.082721	0.253989	0.320915	0.359438	0.12653		0.0332253	0.033225	0.033225	0.0625571	0.065964	0.029329	0.0255854		0.0826251	0.054905	0.077146	0.0378931	0.073667	0.0156678	0.030608
163	10.8667	0.154256	0.172208	0.186316	0.32866	0.11959	0.26092	0.192705	0.308194	0.059125	0.195008	0.306762	0.337778	0.230088	0.082486	0.242937	0.317657	0.367541	0.130276		0.0424875	0.042488	0.042488	0.0599845	0.032608	0.0276999	0.0246212		0.0801214	0.054089	0.06557	0.0316057	0.077917	0.0148008	0.035714
164	10.9333	0.151579	0.179337	0.191037	0.330044	0.106619	0.261194	0.200058	0.328699	0.059117	0.198728	0.312622	0.313882	0.239486	0.086303	0.262701	0.319644	0.377155	0.144346		0.0340729	0.034073	0.034073	0.0614677	0.030583	0.0288275	0.0244379		0.0800439	0.054115	0.059361	0.0365985	0.071121	0.0149026	0.033718
165	11	0.153956	0.172465	0.186654	0.330226	0.101266	0.275192	0.191608	0.324296	0.043516	0.215347	0.306709	0.303358	0.23305	0.080157	0.263812	0.324229	0.379071	0.133006		0.0328014	0.032801	0.032801	0.061411	0.025766	0.023827	0.0200035		0.075015	0.052185	0.049018	0.0319508	0.072903	0.0120892	0.032582
166	11.0667	0.148156	0.159816	0.185467	0.330926	0.113233	0.2771	0.194345	0.310189	0.055076	0.209216	0.309131	0.315191	0.253787	0.07559	0.251819	0.341673	0.377214	0.092329		0.035308	0.035308	0.035308	0.0602103	0.027529	0.0303975	0.0276789		0.0741957	0.05617	0.049508	0.0263185	0.066566	0.0173348	0.037095
167	11.1333	0.151601	0.167149	0.183916	0.339668	0.116284	0.276501	0.191542	0.337625	0.049775	0.210846	0.307174	0.314271	0.229655	0.077057	0.24741	0.329654	0.384319	0.114776		0.0343466	0.034347	0.034347	0.0642317	0.036421	0.0300164	0.0231367		0.0595482	0.061892	0.04678	0.0404393	0.067678	0.0175909	0.034526
168	11.2	0.153282	0.180018	0.178881	0.334455	0.097327	0.274458	0.199495	0.340604	0.053292	0.214604	0.304939	0.31177	0.249989	0.072509	0.262331	0.321225	0.382849	0.102564		0.0411699	0.04117	0.04117	0.067654	0.030403	0.0235591	0.0236764		0.0630192	0.064492	0.040064	0.0336933	0.066173	0.0121501	0.035938
169	11.2667	0.155921	0.177205	0.182537	0.341778	0.119843	0.267541	0.19979	0.34366	0.052898	0.220989	0.289954	0.322249	0.248827	0.068088	0.23968	0.323768	0.352843	0.106957		0.0466815	0.046682	0.046682	0.0740597	0.0388	0.0266184	0.0196541		0.0611422	0.055787	0.064693	0.041489	0.065916	0.014865	0.03327
170	11.3333	0.158858	0.178427	0.182418	0.346462	0.126115	0.262509	0.205012	0.348822	0.074833	0.221353	0.293894	0.315123	0.239523	0.068525	0.241157	0.327886	0.360572	0.111361		0.0403414	0.040341	0.040341	0.0522152	0.032927	0.0252	0.0237736		0.071953	0.067025	0.035335	0.0442084	0.066679	0.0166667	0.031866
171	11.4	0.153418	0.168083	0.181348	0.359735	0.132791	0.248851	0.20061	0.33479	0.073972	0.224964	0.300337	0.325289	0.29051	0.073274	0.22812	0.335487	0.382642	0.127748		0.0363324	0.036332	0.036332	0.0649739	0.048279	0.0323494	0.0245006		0.0917028	0.067606	0.07213	0.0368784	0.058169	0.016101	0.039735
172	11.4667	0.151312	0.174019	0.185619	0.313733	0.113875	0.192927	0.220271	0.341792	0.046142	0.207723	0.293361	0.323972	0.279561	0.071271	0.29059	0.334056	0.377117	0.099606		0.0289107	0.028911	0.028911	0.0625501	0.057407	0.0312729	0.0191464		0.0929368	0.059395	0.036716	0.00722983	0.059366	0.0160089	0.039119
173	11.5333	0.155374	0.202669	0.184	0.283847	0.113039	0.145256	0.215276	0.357362	0.056495	0.221417	0.292087	0.317938	0.273077	0.071569	0.277171	0.322475	0.391061	0.087108		0.0285941	0.028594	0.028594	0.0644328	0.045972	0.0211847	0.0268682		0.0973963	0.071987	0.025325	0.0159719	0.073962	0.0158818	0.044628
174	11.6	0.144197	0.202729	0.191765	0.281406	0.084483	0.227976	0.214651	0.341584	0.044427	0.213125	0.299131	0.317613	0.258572	0.073514	0.296926	0.310654	0.399336	0.116551		0.0276376	0.027638	0.027638	0.0723905	0.050921	0.0257753	0.0249707		0.0811335	0.063907	0.040037	0.0398905	0.079105	0.0169059	0.045358
175	11.6667	0.152734	0.201507	0.186459	0.274674	0.103788	0.245419	0.214172	0.306518	0.053195	0.221661	0.291109	0.361419	0.257727	0.06529	0.30098	0.319858	0.399355	0.124558		0.0280158	0.028016	0.028016	0.0642645	0.049533	0.0234316	0.0285171		0.0848958	0.072943	0.042087	0.0557483	0.091845	0.0156888	0.046247
176	11.7333	0.16	0.206788	0.189064	0.289279	0.086576	0.246313	0.216852	0.290122	0.045217	0.22761	0.301002	0.318522	0.243326	0.056438	0.298288	0.306413	0.40073	0.141598		0.0284596	0.02846	0.02846	0.076659	0.048689	0.0271098	0.0279102		0.0771429	0.071121	0.045235	0.0591661	0.079653	0.0169423	0.05461
177	11.8	0.153358	0.208197	0.192978	0.314518	0.079106	0.253965	0.204148	0.403651	0.065118	0.217919	0.299633	0.338672	0.27612	0.042948	0.283337	0.309133	0.403185	0.167235		0.0326917	0.032692	0.032692	0.0562338	0.055058	0.0290258	0.0279178		0.069373	0.073353	0.060848	0.0422671	0.067619	0.0133486	0.044826
178	11.8667	0.166667	0.210527	0.188225	0.303029	0.110159	0.249895	0.205074	0.347135	0.079757	0.219954	0.298628	0.346028	0.280045	0.048581	0.248183	0.307774	0.400707	0.159325		0.0203218	0.020322	0.020322	0.0660811	0.045572	0.0247688	0.0281467		0.10659	0.070133	0.04495	0.0646165	0.066185	0.0152757	0.035443
179	11.9333	0.146508	0.209798	0.195489	0.291454	0.158193	0.264202	0.211236	0.226498	0.059557	0.230267	0.292817	0.336929	0.27341	0.059513	0.247295	0.304368	0.403364	0.137587		0.0268358	0.026836	0.026836	0.0544422	0.038354	0.0253512	0.0244918		0.123725	0.08221	0.03287	0.035355	0.063965	0.0189402	0.048487
180	12	0.168901	0.211826	0.202557	0.288379	0.105465	0.24676	0.206392	0.191814	0.06243	0.217992	0.312515	0.352288	0.288775	0.05553	0.271531	0.310867	0.409111	0.082009		0.0314621	0.031462	0.031462	0.0515933	0.048477	0.026529	0.0318482		0.087413	0.097253	0.050487	0.046899	0.059626	0.0159448	0.039333
181	12.0667	0.165366	0.222354	0.2113	0.292491	0.123644	0.254864	0.207001	0.276341	0.045584	0.218856	0.310466	0.349988	0.294835	0.05281	0.253758	0.30608	0.391724	0.098915		0.0308366	0.030837	0.030837	0.0540326	0.041727	0.0239313	0.028218		0.100999	0.085248	0.049396	0.0341343	0.072029	0.0161699	0.04942
182	12.1333	0.190607	0.217724	0.214184	0.27982	0.085372	0.24973	0.19139	0.236897	0.048402	0.218459	0.305514	0.350628	0.288553	0.068063	0.266702	0.307023	0.416193	0.106462		0.0290698	0.02907	0.02907	0.050277	0.045554	0.023399	0.023301		0.095152	0.072225	0.041209	0.0696607	0.06479	0.0142198	0.043446
183	12.2	0.188811	0.213097	0.207527	0.278216	0.093163	0.219512	0.186679	0.200237	0.048453	0.221692	0.287987	0.346981	0.303219	0.061599	0.254524	0.292556	0.401311	0.108331		0.0329976	0.032998	0.032998	0.061005	0.040155	0.0225966	0.0273722		0.088538	0.091187	0.062427	0.0502112	0.065463	0.0116059	0.059216
184	12.2667	0.192135	0.217147	0.189177	0.27149	0.12285	0.217577	0.182232	0.306748	0.036846	0.208414	0.2732	0.336906	0.283911	0.061395	0.238661	0.292885	0.394512	0.096928		0.0216145	0.021615	0.021615	0.0555607	0.044605	0.0238288	0.0283172		0.107237	0.084088	0.042925	0.040446	0.066237	0.0127238	0.062489
185	12.3333	0.186858	0.219428	0.19186	0.269179	0.097123	0.231671	0.195826	0.292266	0.067671	0.205016	0.257155	0.349849	0.282498	0.061143	0.2466	0.29749	0.383159	0.125098		0.0175514	0.017551	0.017551	0.0516397	0.055945	0.0218006	0.0253714		0.108767	0.079724	0.048871	0.0502909	0.070474	0.00955083	0.068769
186	12.4	0.178407	0.221095	0.192731	0.256648	0.111809	0.25056	0.200284	0.302603	0.038265	0.210068	0.242902	0.351919	0.282017	0.073037	0.239248	0.297538	0.385149	0.102617		0.0302187	0.030219	0.030219	0.0540727	0.044633	0.017423	0.0223575		0.108529	0.093482	0.043634	0.0664273	0.057757	0.0156372	0.06594
187	12.4667	0.171053	0.219744	0.197677	0.267499	0.105983	0.248608	0.190535	0.285148	0.040806	0.203052	0.244296	0.372036	0.282743	0.085642	0.219776	0.298982	0.389971	0.127836		0.0265916	0.026592	0.026592	0.0604005	0.048095	0.0267054	0.028897		0.116191	0.083263	0.037297	0.0452206	0.063822	0.0150734	0.046409
188	12.5333	0.177274	0.219395	0.20156	0.273182	0.110989	0.243924	0.199772	0.245362	0.045633	0.176863	0.237014	0.381333	0.280172	0.089403	0.195557	0.291171	0.387794	0.102072		0.0232333	0.023233	0.023233	0.0677426	0.045501	0.0257324	0.0256112		0.114408	0.090468	0.048624	0.060577	0.072741	0.0126099	0.042673
189	12.6	0.169511	0.21721	0.199807	0.267771	0.128057	0.23611	0.195645	0.263925	0.065225	0.175234	0.236809	0.375873	0.274241	0.090113	0.207761	0.286976	0.385281	0.130512		0.0227201	0.02272	0.02272	0.0612962	0.015947	0.044164	0.0281746		0.095889	0.076716	0.043677	0.0448203	0.065652	0.0104773	0.045418
190	12.6667	0.166821	0.20477	0.208255	0.272116	0.139741	0.236329	0.198165	0.282895	0.067861	0.189005	0.231668	0.38075	0.262719	0.100412	0.237802	0.281044	0.395262	0.108273		0.0234845	0.023485	0.023485	0.069001	0.038881	0.0210056	0.0287107		0.111137	0.082575	0.057893	0.0613229	0.067257	0.0117045	0.046512
191	12.7333	0.166867	0.197613	0.204511	0.281085	0.117476	0.263062	0.203507	0.276333	0.025737	0.179191	0.243118	0.386883	0.274082	0.117013	0.23538	0.288083	0.369012	0.113729		0.023373	0.023373	0.023373	0.0598954	0.026711	0.0275354	0.0312802		0.093921	0.090949	0.049418	0.0425532	0.086084	0.0106174	0.061009
192	12.8	0.162873	0.203562	0.200654	0.287252	0.118031	0.265964	0.206177	0.279518	0.058721	0.184136	0.229328	0.383933	0.290264	0.115493	0.243981	0.265197	0.363653	0.12645		0.0268714	0.026871	0.026871	0.0594846	0.02699	0.0254304	0.0237366		0.11243	0.083091	0.059189	0.0710291	0.069073	0.0134409	0.046209
193	12.8667	0.16591	0.194801	0.19471	0.288119	0.109479	0.256321	0.203739	0.284805	0.075794	0.198289	0.235734	0.384092	0.285983	0.141171	0.272398	0.290534	0.356583	0.101352		0.0251522	0.025152	0.025152	0.0605596	0.032258	0.0265211	0.0277328		0.102094	0.077996	0.048763	0.0298742	0.060743	0.0126254	0.044732
194	12.9333	0.159239	0.199368	0.200918	0.292423	0.09879	0.259961	0.207139	0.281074	0.067206	0.201403	0.233744	0.387502	0.309061	0.125481	0.309434	0.281211	0.303187	0.106431		0.0215787	0.021579	0.021579	0.062724	0.02733	0.0295741	0.03387		0.095441	0.072808	0.076323	0.0415565	0.063459	0.011703	0.047619
195	13	0.159321	0.192116	0.197161	0.305234	0.114738	0.266089	0.207456	0.292125	0.069964	0.192819	0.228598	0.387722	0.300082	0.133696	0.294483	0.274558	0.339025	0.012407		0.0270166	0.027017	0.027017	0.0686795	0.033191	0.031213	0.028394		0.11899	0.064994	0.049886	0.0514199	0.060268	0.0124481	0.053568
196	13.0667	0.158823	0.190728	0.191594	0.300916	0.10227	0.259954	0.20066	0.289226	0.035959	0.175254	0.238846	0.379416	0.319373	0.107515	0.2887	0.266517	0.342717	0.014392		0.0305396	0.03054	0.03054	0.0645201	0.035646	0.0309409	0.0302154		0.090596	0.059862	0.038489	0.0411506	0.062823	0.0125809	0.053056
197	13.1333	0.162762	0.184672	0.194341	0.30922	0.15021	0.278211	0.190089	0.193452	0.054567	0.188137	0.253916	0.390062	0.335762	0.117342	0.279605	0.267509	0.367301	0.008214		0.0241584	0.024158	0.024158	0.0624276	0.037094	0.0292663	0.0308462		0.10371	0.063526	0.048613	0.0600474	0.065541	0.0114063	0.057481
198	13.2	0.156213	0.187223	0.20066	0.318048	0.133698	0.278129	0.207976	0.089578	0.041065	0.161573	0.254978	0.390807	0.335581	0.111837	0.280312	0.286466	0.344449	0.015654		0.0317839	0.031784	0.031784	0.0720112	0.03676	0.0275938	0.0261168		0.115956	0.059039	0.052598	0.0403975	0.067497	0.0126632	0.052031
199	13.2667	0.161037	0.188121	0.198492	0.313362	0.119544	0.275075	0.208076	0.137776	0.027465	0.166877	0.262464	0.381959	0.327485	0.090047	0.290996	0.300207	0.322459	0.010647		0.0269653	0.026965	0.026965	0.0680625	0.036541	0.0215884	0.0291798		0.092519	0.062535	0.064582	0.0654022	0.058101	0.0167766	0.054045
200	13.3333	0.156744	0.186593	0.212758	0.321227	0.15645	0.25443	0.203204	0.020692	0.034771	0.16967	0.272108	0.380229	0.329304	0.123696	0.285465	0.298902	0.2705	0.085228		0.0227454	0.022745	0.022745	0.0735155	0.041437	0.0284698	0.0261697		0.086651	0.062378	0.061644	0.058392	0.063757	0.0141168	0.046657
201	13.4	0.159746	0.190254	0.214485	0.322149	0.147473	0.279849	0.205179	0.021754	0.036532	0.184184	0.274796	0.371859	0.324821	0.091156	0.274451	0.31543	0.270205	0.108446		0.022391	0.022391	0.022391	0.0714598	0.040057	0.0296248	0.0242398		0.106783	0.058824	0.04914	0.05886	0.064745	0.0159844	0.041384
202	13.4667	0.162846	0.183908	0.212101	0.303257	0.097265	0.257904	0.206275	0.020314	0.036595	0.18179	0.2964	0.374655	0.330935	0.084963	0.257026	0.321756	0.277341	0.099517		0.027302	0.027302	0.027302	0.0820977	0.052652	0.0255913	0.0269617		0.110301	0.061378	0.073134	0.0383852	0.05104	0.0170132	0.034385
203	13.5333	0.163369	0.182897	0.219765	0.302416	0.118241	0.255194	0.183316	0.021559	0.036599	0.181567	0.297376	0.369065	0.33622	0.083624	0.251981	0.31568	0.267633	0.067765		0.016555	0.016555	0.016555	0.0826239	0.05382	0.0263211	0.0247525		0.08282	0.0577	0.050697	0.0412432	0.054044	0.0127533	0.034198
204	13.6	0.159397	0.182216	0.230266	0.305411	0.134691	0.260719	0.179883	0.321251	0.037587	0.188169	0.305289	0.378598	0.325285	0.093504	0.253239	0.295755	0.285026	0.063878		0.0281525	0.028153	0.028153	0.0743616	0.048719	0.0266562	0.023781		0.104674	0.052612	0.040951	0.0404891	0.048507	0.0137066	0.050188
205	13.6667	0.160517	0.181527	0.229392	0.294329	0.121381	0.260786	0.181656	0.317279	0.034282	0.191133	0.313786	0.378041	0.325401	0.113367	0.259222	0.286446	0.287503	0.092189		0.0269335	0.026934	0.026934	0.0837302	0.043344	0.0273853	0.0245149		0.100312	0.052305	0.047782	0.0492828	0.063042	0.0114942	0.059336
206	13.7333	0.166775	0.180328	0.235722	0.29223	0.063562	0.257104	0.191888	0.311094	0.029886	0.198599	0.304688	0.378302	0.32464	0.093583	0.227087	0.282615	0.319499	0.066639		0.0313119	0.031312	0.031312	0.0832551	0.045925	0.0267174	0.0271058		0.094469	0.057893	0.035418	0.0460318	0.051448	0.0128681	0.053331
207	13.8	0.164557	0.178011	0.234385	0.296756	0.088246	0.254474	0.184814	0.311842	0.033264	0.203511	0.305824	0.369844	0.327828	0.098913	0.246945	0.261765	0.322725	0.038519		0.0249141	0.024914	0.024914	0.0820175	0.043776	0.0270189	0.0199765		0.068668	0.063934	0.037946	0.028805	0.053034	0.0175499	0.050075
208	13.8667	0.168233	0.174751	0.231828	0.278554	0.148908	0.249957	0.179043	0.309281	0.033853	0.1965	0.312189	0.377374	0.329945	0.088683	0.24249	0.287136	0.308169	0.049481		0.0177445	0.017745	0.017745	0.087886	0.046786	0.0276826	0.0268735		0.070874	0.051262	0.037466	0.0370898	0.045417	0.0185667	0.047118
209	13.9333	0.159511	0.166731	0.22626	0.283661	0.118629	0.256263	0.187393	0.321123	0.039028	0.202508	0.311	0.369121	0.315472	0.099908	0.225196	0.285835	0.291554	0.056024		0.0233281	0.023328	0.023328	0.0851227	0.038165	0.0307263	0.0274796		0.073363	0.050618	0.030886	0.0408546	0.056466	0.0166038	0.05725
210	14	0.159631	0.16111	0.191857	0.282738	0.092851	0.267048	0.17849	0.313875	0.054897	0.199705	0.308943	0.354871	0.328462	0.082005	0.217866	0.278431	0.289064	0.039639		0.0217366	0.021737	0.021737	0.0843773	0.040879	0.0279846	0.0224073		0.057154	0.053612	0.035463	0.0341526	0.057165	0.0179239	0.054817
211	14.0667	0.157432	0.166779	0.187565	0.28556	0.081023	0.275876	0.179513	0.309105	0.056576	0.192775	0.306048	0.358727	0.325432	0.095639	0.244324	0.284853	0.29727	0.055495		0.0254498	0.02545	0.02545	0.09877	0.035172	0.032554	0.0279898		0.080497	0.051347	0.035845	0.0282858	0.04511	0.0165502	0.078341
212	14.1333	0.164217	0.167045	0.201593	0.281727	0.116567	0.272122	0.160561	0.316775	0.050655	0.19903	0.304736	0.354223	0.323788	0.095615	0.23666	0.250708	0.28525	0.090915		0.0202758	0.020276	0.020276	0.0765494	0.038868	0.0289414	0.0262786		0.068199	0.054245	0.0325	0.0399325	0.055081	0.014723	0.06436
213	14.2	0.164563	0.16369	0.200248	0.272398	0.1087	0.264502	0.166168	0.315357	0.042893	0.192005	0.302787	0.351125	0.325605	0.104325	0.243636	0.265358	0.310084	0.057393		0.0251743	0.025174	0.025174	0.0856525	0.034274	0.0299219	0.0244094		0.072309	0.055202	0.045666	0.052428	0.055956	0.0156983	0.072131
214	14.2667	0.163644	0.168795	0.199428	0.262404	0.101817	0.265538	0.167785	0.322818	0.029103	0.206282	0.301459	0.342595	0.312719	0.111934	0.232612	0.267411	0.312935	0.052349		0.0231918	0.023192	0.023192	0.0769546	0.031185	0.0306746	0.0281528		0.058086	0.062604	0.045473	0.0648636	0.057199	0.0155873	0.083238
215	14.3333	0.163756	0.170128	0.195404	0.266353	0.101204	0.24605	0.163467	0.3312	0.061113	0.203218	0.305291	0.346631	0.29664	0.120221	0.241397	0.265333	0.284528	0.058393		0.0286046	0.028605	0.028605	0.0847336	0.032285	0.0344287	0.0258949		0.095549	0.051138	0.037032	0.0496689	0.061593	0.0160796	0.084723
216	14.4	0.165117	0.166174	0.194777	0.266699	0.098919	0.257964	0.160428	0.337864	0.053032	0.194456	0.301043	0.342722	0.273911	0.130298	0.224493	0.277479	0.318083	0.039612		0.0241339	0.024134	0.024134	0.0697404	0.041062	0.0319139	0.028796		0.06862	0.044209	0.04936	0.0536129	0.04794	0.0175238	0.065231
217	14.4667	0.161511	0.163908	0.200756	0.26666	0.085323	0.247041	0.168654	0.339418	0.052779	0.225482	0.30572	0.345547	0.29658	0.112058	0.244902	0.239639	0.319373	0.035228		0.0177608	0.017761	0.017761	0.0879499	0.053096	0.0320337	0.0282686		0.067251	0.050797	0.05	0.0284035	0.046538	0.0154185	0.0755
218	14.5333	0.158865	0.175996	0.202958	0.268694	0.072657	0.26192	0.147641	0.335634	0.082763	0.220378	0.294828	0.332637	0.285401	0.100834	0.24835	0.248663	0.327934	0.06411		0.0229426	0.022943	0.022943	0.0707464	0.039967	0.0328283	0.0259618		0.081546	0.041301	0.056201	0.0409357	0.050119	0.0167455	0.08099
219	14.6	0.155813	0.167377	0.1875	0.272654	0.078469	0.287015	0.165995	0.347387	0.041804	0.216345	0.298319	0.338509	0.282581	0.097583	0.233772	0.258268	0.310962	0.052396		0.0268344	0.026834	0.026834	0.0792262	0.033625	0.0311382	0.0278675		0.09211	0.048895	0.06045	0.0556258	0.045791	0.0173464	0.092042
220	14.6667	0.155632	0.164909	0.18485	0.264873	0.11102	0.273999	0.175468	0.343237	0.060973	0.223335	0.291461	0.332159	0.287275	0.080209	0.263525	0.245611	0.324892	0.077535		0.0267358	0.026736	0.026736	0.083167	0.049354	0.0327029	0.0253633		0.070105	0.047815	0.06312	0.0507099	0.046804	0.0165746	0.082629
221	14.7333	0.159341	0.171039	0.192532	0.279473	0.094322	0.282318	0.182655	0.347314	0.077971	0.216788	0.283742	0.347083	0.281139	0.100576	0.265957	0.242715	0.343207	0.081065		0.0260909	0.026091	0.026091	0.0811044	0.04628	0.0365979	0.0287333		0.106563	0.039953	0.068257	0.043297	0.047706	0.0151056	0.081625
222	14.8	0.164101	0.166667	0.190851	0.28026	0.107632	0.268003	0.178182	0.341696	0.093291	0.226	0.276464	0.341495	0.298876	0.087376	0.281897	0.249534	0.336378	0.049837		0.021306	0.021306	0.021306	0.0912487	0.057488	0.0416991	0.0328537		0.07475	0.043513	0.057401	0.0400104	0.054299	0.015651	0.099133
223	14.8667	0.163434	0.180453	0.193481	0.278088	0.054257	0.267989	0.16977	0.350648	0.064976	0.239673	0.281278	0.337612	0.299549	0.082263	0.269507	0.253687	0.192107	0.072402		0.0254701	0.02547	0.02547	0.0845753	0.041719	0.036978	0.031122		0.068912	0.04533	0.047563	0.0426988	0.040402	0.017857	0.104398
224	14.9333	0.167631	0.173992	0.197494	0.282619	0.066807	0.249669	0.198857	0.331215	0.064772	0.234168	0.27815	0.335921	0.29789	0.081932	0.272093	0.260237	0.308455	0.083298		0.026252	0.026252	0.026252	0.0510132	0.044974	0.0362009	0.0297317		0.0665	0.050414	0.061246	0.0460646	0.052754	0.0175166	0.099092
225	15	0.162621	0.173097	0.189878	0.278891	0.0708	0.246005	0.198707	0.351109	0.062614	0.243639	0.276082	0.342963	0.312084	0.076053	0.270701	0.298831	0.245264	0.085244		0.0237639	0.023764	0.023764	0.059447	0.046769	0.0373246	0.0276664		0.13892	0.042688	0.049688	0.0408872	0.047586	0.0170843	0.100522
226	15.0667	0.164515	0.16775	0.191769	0.280031	0.116802	0.231793	0.212753	0.344438	0.08016	0.258599	0.278428	0.332529	0.316123	0.071181	0.232669	0.301175	0.29755	0.073142		0.0221625	0.022163	0.022163	0.0484291	0.040334	0.0362291	0.0311338		0.080628	0.037009	0.046789	0.0340454	0.045314	0.020563	0.092095
227	15.1333	0.162736	0.179421	0.19195	0.28509	0.080504	0.232727	0.209339	0.345676	0.076	0.238908	0.280283	0.336593	0.300704	0.072403	0.241032	0.325204	0.481183	0.076826		0.0305413	0.030541	0.030541	0.0593067	0.052652	0.0355641	0.0306545		0.112153	0.049217	0.038027	0.0399229	0.040848	0.0186289	0.090834
228	15.2	0.169318	0.172166	0.190875	0.279888	0.114853	0.235443	0.203495	0.316434	0.077867	0.2643	0.270416	0.361856	0.307212	0.073904	0.241764	0.278409	0.488409	0.077083		0.0261514	0.026151	0.026151	0.0622683	0.048198	0.0330924	0.0279844		0.069517	0.056636	0.04906	0.0627834	0.057851	0.015971	0.085408
229	15.2667	0.163689	0.178604	0.185922	0.280067	0.097325	0.236426	0.221466	0.305764	0.06508	0.272813	0.278733	0.330912	0.314651	0.067337	0.240696	0.266525	0.482252	0.060736		0.0238693	0.023869	0.023869	0.0467681	0.041964	0.0377738	0.0325505		0.070228	0.071738	0.039984	0.0487585	0.04635	0.0157954	0.089346
230	15.3333	0.166451	0.171157	0.181847	0.277946	0.038562	0.235069	0.243874	0.300009	0.079455	0.267349	0.277904	0.334604	0.307889	0.049432	0.227261	0.323596	0.502603	0.07411		0.0254105	0.025411	0.025411	0.042594	0.044453	0.0377071	0.032413		0.077792	0.099273	0.053316	0.0509292	0.045996	0.0159082	0.059346
231	15.4	0.170732	0.169658	0.181141	0.217151	0.130537	0.231926	0.244189	0.303442	0.043881	0.263557	0.280098	0.33665	0.309197	0.057974	0.197826	0.348305	0.513797	0.108137		0.0201078	0.020108	0.020108	0.0469415	0.045197	0.0387199	0.0266114		0.083862	0.09533	0.042633	0.051353	0.045144	0.016101	0.061164
232	15.4667	0.159697	0.177667	0.178141	0.258657	0.088425	0.254813	0.245076	0.300671	0.061528	0.252252	0.283186	0.35542	0.305089	0.066714	0.223175	0.374138	0.515265	0.083188		0.0194721	0.019472	0.019472	0.0591013	0.037046	0.0382555	0.0257928		0.086614	0.104158	0.028636	0.0247437	0.045183	0.014185	0.047439
233	15.5333	0.15973	0.172035	0.177839	0.267899	0.074918	0.215378	0.250734	0.311103	0.057358	0.250204	0.268737	0.350083	0.296277	0.05965	0.216507	0.366482	0.502572	0.117968		0.0273219	0.027322	0.027322	0.0447835	0.040932	0.0394105	0.0275639		0.100322	0.109975	0.033157	0.0437122	0.050031	0.0162362	0.051807
234	15.6	0.165834	0.164277	0.175817	0.303217	0.079771	0.229772	0.22907	0.31694	0.041492	0.245011	0.246944	0.393101	0.294199	0.057788	0.196951	0.359355	0.494566	0.068362		0.0275945	0.027595	0.027595	0.0482632	0.043358	0.0298338	0.0270923		0.092642	0.103674	0.055197	0.0385552	0.028729	0.0168189	0.052588
235	15.6667	0.172191	0.166634	0.174155	0.337869	0.08498	0.244837	0.220143	0.308859	0.040777	0.198165	0.252564	0.378645	0.304462	0.061769	0.21711	0.362018	0.404486	0.075089		0.0251196	0.02512	0.02512	0.043054	0.045229	0.0321716	0.0285271		0.097906	0.10773	0.055089	0.0263161	0.029632	0.0133329	0.071047
236	15.7333	0.156785	0.16169	0.174377	0.300722	0.051264	0.240255	0.221959	0.297093	0.040193	0.202961	0.233169	0.371634	0.28733	0.065495	0.211043	0.34454	0.353713	0.053841		0.0248634	0.024863	0.024863	0.0582524	0.037267	0.0327605	0.0243682		0.098845	0.088429	0.026768	0.0418907	0.047712	0.0136531	0.045386
237	15.8	0.168344	0.160242	0.162899	0.269605	0.055111	0.243891	0.226796	0.281224	0.066013	0.208178	0.207698	0.37095	0.294865	0.064696	0.178246	0.356412	0.360495	0.073778		0.0314871	0.031487	0.031487	0.0476562	0.042775	0.0310473	0.0217293		0.097022	0.093988	0.049639	0.0376767	0.042857	0.0116629	0.05016
238	15.8667	0.177477	0.160965	0.166541	0.293135	0.052469	0.249498	0.233933	0.289698	0.037456	0.203636	0.225074	0.385165	0.305359	0.058337	0.168158	0.352474	0.363226	0.07255		0.0330353	0.033035	0.033035	0.0442442	0.041778	0.0311299	0.0203955		0.08449	0.067129	0.054845	0.0247168	0.046179	0.014751	0.077731
239	15.9333	0.174262	0.154987	0.175175	0.301482	0.032478	0.273288	0.231624	0.289235	0.049131	0.209167	0.217052	0.377242	0.298526	0.063252	0.173209	0.353573	0.351082	0.053998		0.0336577	0.033658	0.033658	0.0521111	0.036232	0.0278684	0.0259473		0.095775	0.066379	0.044558	0.034588	0.051819	0.0152757	0.064103
240	16	0.180362	0.160539	0.175069	0.294598	0.059657	0.2524	0.224577	0.277712	0.041719	0.191692	0.212818	0.381404	0.294084	0.066532	0.184532	0.35	0.347449	0.074829		0.0261886	0.026189	0.026189	0.0506051	0.028976	0.0282241	0.0304479		0.098196	0.061404	0.043568	0.048937	0.049493	0.0151066	0.070906
241	16.0667	0.170366	0.153864	0.174645	0.293901	0.048674	0.2602	0.235455	0.283739	0.063098	0.211126	0.21253	0.383968	0.29598	0.062698	0.195988	0.352273	0.340592	0.06703		0.0233645	0.023365	0.023365	0.0514076	0.03762	0.0298406	0.0283807		0.092941	0.04314	0.041682	0.0440343	0.055838	0.0199473	0.065539
242	16.1333	0.182841	0.150739	0.172332	0.299829	0.051974	0.260834	0.224735	0.29048	0.038386	0.20271	0.222112	0.380232	0.297161	0.060218	0.204242	0.351479	0.335978	0.093537		0.0342891	0.034289	0.034289	0.0512333	0.03611	0.0296804	0.0263749		0.147538	0.046076	0.058928	0.038809	0.060317	0.0151401	0.054395
243	16.2	0.173214	0.15734	0.17873	0.288734	0.051459	0.279941	0.232148	0.284279	0.049668	0.200889	0.226857	0.351108	0.272915	0.05616	0.233819	0.354825	0.324512	0.059181		0.0267465	0.026747	0.026747	0.0539704	0.040593	0.0290989	0.0262644		0.114186	0.040542	0.067446	0.054985	0.051305	0.015855	0.064248
244	16.2667	0.172471	0.149077	0.18028	0.284355	0.053696	0.283411	0.2396	0.276915	0.038753	0.190209	0.221211	0.352311	0.294472	0.051248	0.208779	0.355215	0.339717	0.081735		0.0312978	0.031298	0.031298	0.0475336	0.048743	0.0301391	0.0315582		0.080083	0.039921	0.032154	0.0452261	0.051084	0.0142883	0.058338
245	16.3333	0.174469	0.149547	0.172738	0.281834	0.02661	0.247277	0.243593	0.288156	0.053866	0.203355	0.21642	0.356344	0.27608	0.052875	0.222423	0.341253	0.338544	0.052386		0.0252133	0.025213	0.025213	0.0526065	0.045213	0.0296691	0.0270353		0.121376	0.037369	0.074616	0.0526077	0.055422	0.0138383	0.056884
246	16.4	0.180524	0.150487	0.165635	0.292339	0.028154	0.240695	0.241894	0.298365	0.048501	0.223997	0.226339	0.353463	0.262435	0.059911	0.234009	0.318825	0.326375	0.046076		0.0301508	0.030151	0.030151	0.0563489	0.047311	0.0289169	0.0257261		0.109261	0.040187	0.066612	0.0367126	0.061988	0.00943323	0.10008
247	16.4667	0.180612	0.150442	0.163824	0.303556	0.024609	0.243594	0.244356	0.294426	0.063247	0.236128	0.22898	0.349015	0.286755	0.060444	0.220906	0.317917	0.3339	0.03906		0.0332805	0.033281	0.033281	0.0520421	0.047205	0.0309626	0.0293969		0.119914	0.038614	0.049908	0.0357195	0.052685	0.0167365	0.083628
248	16.5333	0.172746	0.145225	0.155746	0.29967	0.063388	0.24198	0.239026	0.29346	0.070787	0.23244	0.23353	0.342327	0.288934	0.074017	0.234298	0.318536	0.310572	0.09184		0.027027	0.027027	0.027027	0.0578416	0.041935	0.0327806	0.0238781		0.110996	0.036279	0.045201	0.0433538	0.055219	0.0111069	0.087667
249	16.6	0.179619	0.145371	0.156365	0.310934	0.110272	0.240063	0.253165	0.297784	0.051737	0.233105	0.225176	0.335961	0.287373	0.061263	0.233789	0.327292	0.305451	0.061059		0.0329795	0.03298	0.03298	0.0570439	0.041819	0.0262904	0.0305879		0.098909	0.035397	0.032807	0.0290248	0.05373	0.0192593	0.057618
250	16.6667	0.174773	0.137736	0.142857	0.304799	0.101924	0.255663	0.240531	0.302893	0.06007	0.240805	0.233611	0.334732	0.299395	0.060418	0.240431	0.314937	0.296979	0.059864		0.0323552	0.032355	0.032355	0.0592623	0.046142	0.0263365	0.0360979		0.121958	0.035599	0.039854	0.0817109	0.063278	0.0189366	0.072422
251	16.7333	0.176733	0.142201	0.151888	0.197993	0.119868	0.248338	0.240661	0.273809	0.059807	0.251415	0.239356	0.341857	0.281241	0.06622	0.25586	0.306604	0.304764	0.064213		0.0285429	0.028543	0.028543	0.0546133	0.041224	0.0307692	0.0351606		0.103338	0.034105	0.038475	0.0441514	0.048737	0.017378	0.07874
252	16.8	0.188415	0.143956	0.144507	0.205099	0.126255	0.251837	0.239495	0.268088	0.049643	0.251509	0.2422	0.338344	0.285963	0.059262	0.255831	0.294987	0.285296	0.052771		0.0284724	0.028472	0.028472	0.0613732	0.046429	0.0240219	0.0405074		0.119691	0.046623	0.043803	0.0316686	0.059826	0.0224505	0.090794
253	16.8667	0.177332	0.147159	0.146172	0.209874	0.100766	0.240448	0.222548	0.303875	0.039474	0.25469	0.254281	0.329656	0.286097	0.061278	0.261034	0.297646	0.314398	0.065164		0.0298149	0.029815	0.029815	0.0545698	0.053218	0.0267913	0.0369834		0.106015	0.044329	0.030901	0.0460018	0.051516	0.0164474	0.085185
254	16.9333	0.1875	0.148523	0.143913	0.220084	0.144784	0.254047	0.237263	0.249413	0.057235	0.263136	0.260182	0.318911	0.288837	0.07529	0.258913	0.310898	0.297747	0.106524		0.0357004	0.0357	0.0357	0.0519149	0.042101	0.0273204	0.0417018		0.104114	0.049681	0.051662	0.0585575	0.056857	0.0234996	0.090075
255	17	0.197094	0.140849	0.140318	0.211519	0.118887	0.255668	0.228169	0.304898	0.033852	0.266271	0.259956	0.319045	0.280075	0.071808	0.247916	0.310665	0.31024	0.091137		0.0285311	0.028531	0.028531	0.051711	0.040394	0.0229572	0.0430997		0.07761	0.053112	0.03215	0.0483322	0.056672	0.0151286	0.063166
256	17.0667	0.196586	0.14559	0.132508	0.216063	0.155033	0.238798	0.232581	0.289785	0.038961	0.252151	0.260905	0.306579	0.283492	0.065896	0.212062	0.302319	0.28048	0.084919		0.0316781	0.031678	0.031678	0.0577957	0.041348	0.0253262	0.0422705		0.111362	0.054335	0.056566	0.0372392	0.063726	0.0148458	0.098442
257	17.1333	0.203582	0.141994	0.141859	0.222581	0.148403	0.251705	0.22245	0.280271	0.037138	0.249568	0.267546	0.318455	0.262415	0.069767	0.212086	0.305345	0.285426	0.062545		0.0325032	0.032503	0.032503	0.0570673	0.038106	0.0276104	0.0417007		0.106464	0.075273	0.037242	0.0506928	0.058968	0.0159031	0.057784
258	17.2	0.205965	0.147898	0.142354	0.216861	0.170833	0.245422	0.22243	0.301389	0.036899	0.248909	0.263541	0.315496	0.268486	0.066575	0.154131	0.303063	0.29789	0.056034		0.054627	0.054627	0.054627	0.0539484	0.032933	0.0264404	0.0395883		0.107176	0.070572	0.031906	0.0553925	0.066743	0.0115203	0.073129
259	17.2667	0.21107	0.158007	0.136699	0.222491	0.127221	0.255001	0.224201	0.300323	0.03659	0.244726	0.258287	0.323271	0.26889	0.062685	0.111144	0.30839	0.286324	0.083774		0.0497001	0.0497	0.0497	0.0491769	0.03963	0.0253734	0.0464567		0.110551	0.077201	0.040583	0.0441029	0.063281	0.0153359	0.064332
260	17.3333	0.219162	0.154891	0.113978	0.217807	0.142044	0.251942	0.214067	0.308268	0.049649	0.241375	0.26313	0.328151	0.258591	0.062222	0.198391	0.304499	0.301084	0.055467		0.0344973	0.034497	0.034497	0.0546302	0.035383	0.0315175	0.0447205		0.120755	0.09961	0.029557	0.0302801	0.068776	0.0135723	0.063282
261	17.4	0.21949	0.160464	0.122067	0.226185	0.141241	0.257217	0.216424	0.283378	0.048695	0.233766	0.255157	0.311242	0.283404	0.065079	0.182027	0.304881	0.302719	0.098199		0.0302643	0.030264	0.030264	0.0615328	0.040347	0.0257237	0.0462135		0.133923	0.105814	0.044657	0.0411742	0.068668	0.0126506	0.050095
262	17.4667	0.212588	0.123485	0.119857	0.238878	0.136166	0.255764	0.21442	0.297971	0.02939	0.229924	0.280221	0.320827	0.258334	0.065083	0.189504	0.312934	0.291031	0.071446		0.0333343	0.033334	0.033334	0.0608425	0.041545	0.0263055	0.0450068		0.096688	0.110995	0.051878	0.0364095	0.065417	0.0114518	0.051745
263	17.5333	0.180773	0.149462	0.13144	0.237442	0.137716	0.248671	0.200402	0.295126	0.036478	0.21599	0.273641	0.292956	0.238539	0.060837	0.18049	0.306539	0.31573	0.060081		0.0443371	0.044337	0.044337	0.0634686	0.038638	0.0291787	0.0498558		0.121224	0.089074	0.03189	0.0247703	0.076953	0.0160116	0.051558
264	17.6	0.187706	0.178504	0.170604	0.247013	0.149414	0.263767	0.196099	0.297304	0.034253	0.21516	0.270405	0.313103	0.247478	0.062118	0.186997	0.306944	0.317741	0.041585		0.0286185	0.028619	0.028619	0.0699658	0.050154	0.0318525	0.0489007		0.097631	0.121501	0.030612	0.0332835	0.068729	0.0134048	0.047097
265	17.6667	0.191382	0.171746	0.172737	0.2651	0.11901	0.253804	0.200255	0.289982	0.033133	0.229342	0.276694	0.315939	0.223937	0.065104	0.183504	0.2998	0.313767	0.04071		0.0342466	0.034247	0.034247	0.0613659	0.042404	0.0262987	0.0476562		0.122582	0.111256	0.061111	0.0244294	0.061329	0.0140311	0.045387
266	17.7333	0.19202	0.173184	0.133287	0.263616	0.141538	0.258551	0.192172	0.28915	0.040775	0.249393	0.265148	0.314853	0.255177	0.057379	0.210103	0.299963	0.311025	0.052068		0.0302294	0.030229	0.030229	0.0618781	0.047275	0.0268791	0.0500201		0.120533	0.100575	0.041968	0.0310675	0.074117	0.0140473	0.048838
267	17.8	0.193658	0.176962	0.131918	0.265277	0.124473	0.254209	0.209209	0.298862	0.049945	0.217691	0.272212	0.297584	0.265193	0.060009	0.197807	0.297542	0.304952	0.102253		0.0422248	0.042225	0.042225	0.062265	0.047656	0.0303144	0.0517247		0.103891	0.096216	0.030964	0.0507627	0.072323	0.0126292	0.054908
268	17.8667	0.192697	0.172442	0.158332	0.251988	0.157347	0.249992	0.194757	0.676363	0.033981	0.221996	0.273465	0.301872	0.288419	0.058517	0.201645	0.307775	0.328351	0.005798		0.0358265	0.035827	0.035827	0.0689496	0.061195	0.0250156	0.0776847		0.102119	0.068772	0.063391	0.0526749	0.07087	0.0155775	0.056174
269	17.9333	0.204052	0.172442	0.149157	0.251213	0.113203	0.249213	0.214335	0.544907	0.045853	0.230152	0.275989	0.277845	0.2762	0.069449	0.187557	0.304024	0.328863	0.054176		0.048569	0.048569	0.048569	0.0736012	0.058736	0.0312404	0.086516		0.088419	0.06552	0.031769	0.0426199	0.070644	0.0123642	0.054069
270	18	0.196265	0.174893	0.183629	0.253676	0.176287	0.233581	0.218358	0.595896	0.047245	0.226444	0.265328	0.29807	0.278242	0.061419	0.196867	0.300014	0.350718	0.070204		0.0331299	0.03313	0.03313	0.063241	0.055337	0.0287529	0.0842104		0.119515	0.059719	0.045915	0.0437759	0.064907	0.0137982	0.050417
271	18.0667	0.197307	0.17106	0.181589	0.235698	0.109054	0.230774	0.214638	0.583432	0.045221	0.2141	0.245712	0.297776	0.275708	0.064335	0.191637	0.284338	0.343371	0.076697		0.0291341	0.029134	0.029134	0.0696007	0.055929	0.0324248	0.082682		0.097038	0.06113	0.031137	0.0395496	0.0586	0.0134658	0.047966
272	18.1333	0.191973	0.168299	0.183826	0.247619	0.105076	0.242196	0.220628	0.645877	0.035039	0.23058	0.257467	0.299908	0.275973	0.066381	0.205132	0.291501	0.238564	0.052744		0.0377934	0.037793	0.037793	0.0715899	0.052872	0.030944	0.0499641		0.10151	0.056338	0.035131	0.0323383	0.065318	0.0139733	0.050379
273	18.2	0.196196	0.168139	0.188251	0.254799	0.111198	0.238716	0.218275	0.212733	0.049531	0.23538	0.254586	0.300673	0.278191	0.0567	0.198845	0.268129	0.255426	0.066017		0.0462241	0.046224	0.046224	0.0666922	0.046757	0.0317133	0.0723555		0.099828	0.058521	0.054505	0.0358174	0.049096	0.0147121	0.059662
274	18.2667	0.196832	0.140636	0.175321	0.251943	0.20743	0.23838	0.217233	0.323713	0.044262	0.232866	0.257318	0.310114	0.279818	0.064655	0.19067	0.278755	0.369539	0.090002		0.0307319	0.030732	0.030732	0.0686826	0.043866	0.0326786	0.0659721		0.087343	0.043613	0.038599	0.0500759	0.050595	0.0136632	0.046568
275	18.3333	0.198226	0.14095	0.183064	0.255736	0.125875	0.265948	0.210314	0.316964	0.049876	0.244642	0.25012	0.26876	0.282526	0.071206	0.225348	0.28395	0.377151	0.024847		0.0388166	0.038817	0.038817	0.0528866	0.042558	0.0345996	0.0679084		0.089839	0.057352	0.066002	0.0419144	0.045734	0.0128496	0.066314
276	18.4	0.199551	0.141631	0.169706	0.243756	0.107102	0.253757	0.218835	0.321116	0.03391	0.242383	0.248	0.287336	0.279183	0.062635	0.229414	0.264176	0.371349	0.111845		0.0441295	0.04413	0.04413	0.0634853	0.037965	0.0326545	0.0617889		0.0873	0.05873	0.05618	0.0332532	0.046838	0.0167811	0.064366
277	18.4667	0.193256	0.154547	0.172778	0.239563	0.14763	0.268059	0.212993	0.290858	0.045914	0.224745	0.240007	0.24429	0.284451	0.067851	0.220212	0.256308	0.36911	0.068182		0.0310609	0.031061	0.031061	0.0700456	0.049156	0.0360776	0.0654427		0.076456	0.049877	0.039326	0.0446527	0.051009	0.0130376	0.065975
278	18.5333	0.194065	0.157741	0.164539	0.239544	0.100931	0.256142	0.215198	0.305519	0.060829	0.22081	0.240086	0.239544	0.28035	0.067534	0.224606	0.265858	0.372817	0.070302		0.036647	0.036647	0.036647	0.0687186	0.043893	0.0341818	0.0650823		0.080714	0.0541	0.053015	0.0260433	0.04704	0.0130208	0.064176
279	18.6	0.189518	0.161087	0.133794	0.231548	0.11943	0.252868	0.220348	0.297724	0.047486	0.232892	0.24224	0.258129	0.267258	0.0778	0.224647	0.266384	0.372186	0.092785		0.0366756	0.036676	0.036676	0.0656238	0.048572	0.029257	0.0588562		0.106331	0.056009	0.048505	0.0633268	0.045938	0.0152303	0.078936
280	18.6667	0.186329	0.159266	0.126253	0.223699	0.129984	0.264062	0.220572	0.292301	0.053396	0.223762	0.242872	0.254353	0.252246	0.064544	0.213255	0.260985	0.358674	0.068712		0.0337821	0.033782	0.033782	0.0579601	0.04186	0.0367036	0.0587021		0.067968	0.056046	0.049344	0.0468162	0.051831	0.0135187	0.067713
281	18.7333	0.197577	0.157687	0.148909	0.224302	0.1048	0.2729	0.226083	0.298491	0.041872	0.243022	0.236716	0.245484	0.259415	0.057004	0.202734	0.269934	0.383145	0.062792		0.0434205	0.043421	0.043421	0.0502513	0.042402	0.0324572	0.0599756		0.09678	0.057124	0.044823	0.0416345	0.040357	0.0175254	0.089308
282	18.8	0.197321	0.156545	0.165478	0.231141	0.10141	0.275382	0.22754	0.294637	0.036275	0.233441	0.24271	0.268595	0.274503	0.066285	0.197356	0.271006	0.376088	0.075201		0.0433752	0.043375	0.043375	0.0541985	0.042593	0.0312011	0.0562363		0.076953	0.053978	0.036107	0.0399338	0.039506	0.0160892	0.085223
283	18.8667	0.192847	0.161582	0.165992	0.230656	0.101196	0.287762	0.221341	0.30367	0.041221	0.218402	0.242456	0.267885	0.28029	0.063323	0.184258	0.280601	0.36797	0.067818		0.0405503	0.04055	0.04055	0.0480679	0.045885	0.028005	0.0570785		0.113817	0.061935	0.040047	0.0354232	0.035333	0.0123734	0.033946
284	18.9333	0.192091	0.15763	0.160488	0.233925	0.112637	0.283304	0.231046	0.308696	0.033239	0.215975	0.240186	0.259087	0.274031	0.058932	0.176972	0.269283	0.390549	0.089362		0.0395576	0.039558	0.039558	0.0444121	0.048197	0.0294479	0.054904		0.092178	0.066552	0.050835	0.0532246	0.043849	0.0144454	0.019687
285	19	0.1874	0.147759	0.162513	0.236728	0.113391	0.305149	0.237187	0.304906	0.031414	0.207355	0.237726	0.268892	0.290886	0.048594	0.164562	0.276316	0.380701	0.072379		0.0335062	0.033506	0.033506	0.0572248	0.046797	0.0315263	0.0521073		0.095533	0.06672	0.033462	0.0340616	0.025067	0.0122555	0.066512
286	19.0667	0.186604	0.152913	0.16313	0.230085	0.137014	0.254235	0.263805	0.307259	0.036915	0.196154	0.236617	0.262932	0.277056	0.039879	0.16468	0.279741	0.359515	0.091294		0.0442933	0.044293	0.044293	0.0517776	0.042396	0.0261585	0.0555344		0.071126	0.077169	0.044169	0.0307554	0.049743	0.0142193	0.021101
287	19.1333	0.185384	0.146023	0.165708	0.230849	0.149541	0.264112	0.246514	0.306328	0.040784	0.2103	0.232223	0.266983	0.273064	0.055068	0.169215	0.286623	0.375732	0.065754		0.0490694	0.049069	0.049069	0.0552124	0.042663	0.0275153	0.0518018		0.077947	0.073197	0.046639	0.0426688	0.047676	0.0142527	0.02498
288	19.2	0.190416	0.150191	0.167831	0.227303	0.128585	0.271728	0.246951	0.296531	0.029868	0.174666	0.224005	0.260228	0.288651	0.051043	0.172043	0.294184	0.370264	0.035505		0.0333778	0.033378	0.033378	0.0487106	0.054112	0.0266927	0.0511034		0.083928	0.083538	0.030124	0.0289091	0.038185	0.0177834	0.02263
289	19.2667	0.197323	0.144805	0.166722	0.238502	0.122905	0.276567	0.245669	0.307687	0.038981	0.174169	0.215325	0.26309	0.279809	0.054867	0.189271	0.300047	0.360867	0.060014		0.037765	0.037765	0.037765	0.0407758	0.034353	0.0266562	0.0542607		0.080677	0.067848	0.046479	0.0372556	0.035479	0.0143575	0.022682
290	19.3333	0.190847	0.15101	0.170751	0.238118	0.126106	0.270157	0.259633	0.303925	0.039908	0.186473	0.212468	0.288571	0.270537	0.05536	0.173603	0.279192	0.369197	0.057643		0.0508946	0.050895	0.050895	0.0584534	0.040731	0.029771	0.0518632		0.073066	0.072517	0.04867	0.040974	0.042482	0.015236	0.021886
291	19.4	0.178997	0.144937	0.178783	0.22448	0.115924	0.247252	0.247939	0.31205	0.043426	0.165816	0.203429	0.30111	0.281702	0.057019	0.203818	0.280367	0.35688	0.047151		0.0369768	0.036977	0.036977	0.0546318	0.036073	0.0241891	0.0545593		0.094792	0.083453	0.039919	0.0339763	0.045473	0.0139675	0.019427
292	19.4667	0.192307	0.140102	0.183579	0.232251	0.144071	0.250565	0.241312	0.316022	0.035552	0.175715	0.195102	0.28243	0.275412	0.065939	0.207634	0.276976	0.366239	0.092578		0.0270482	0.027048	0.027048	0.0660648	0.046456	0.0258954	0.0513775		0.061748	0.069514	0.060972	0.0347762	0.043978	0.0157625	0.021841
293	19.5333	0.164751	0.127692	0.181302	0.219467	0.080958	0.255304	0.23428	0.318845	0.037337	0.158872	0.202453	0.261605	0.279529	0.058481	0.197388	0.282974	0.358508	0.116349		0.0386459	0.038646	0.038646	0.0634852	0.039932	0.025641	0.0529435		0.09499	0.069448	0.053961	0.0431582	0.037743	0.0151265	0.020568
294	19.6	0.173162	0.129506	0.178346	0.221769	0.105278	0.259486	0.219155	0.322212	0.027842	0.171394	0.19077	0.268358	0.302023	0.053851	0.207847	0.268779	0.353002	0.090758		0.0412523	0.041252	0.041252	0.061683	0.031861	0.024441	0.0533205		0.108335	0.066207	0.047721	0.0307085	0.038947	0.012427	0.02217
295	19.6667	0.165398	0.123828	0.168557	0.218273	0.114746	0.266314	0.208736	0.32659	0.026079	0.186309	0.183344	0.279599	0.305356	0.057221	0.239837	0.280825	0.345488	0.072747		0.0431046	0.043105	0.043105	0.0726104	0.033447	0.027918	0.050677		0.102897	0.066057	0.051862	0.0456831	0.039683	0.0135263	0.0201
296	19.7333	0.178017	0.157616	0.153901	0.216531	0.110986	0.267221	0.221337	0.32287	0.029533	0.182772	0.178771	0.276136	0.296734	0.075044	0.214472	0.290639	0.358702	0.125175		0.040863	0.040863	0.040863	0.0596206	0.039879	0.0270373	0.0351591		0.101822	0.069076	0.063552	0.044719	0.021221	0.01461	0.018944
297	19.8	0.149449	0.14602	0.167502	0.212731	0.122385	0.267912	0.222417	0.315031	0.036776	0.168458	0.191009	0.298071	0.29824	0.084201	0.239047	0.285776	0.349023	0.080941		0.0316514	0.031651	0.031651	0.075988	0.039403	0.0285309	0.0251759		0.114448	0.066691	0.043823	0.0330462	0.037587	0.0151918	0.017105
298	19.8667	0.168157	0.160176	0.169739	0.218457	0.089754	0.253946	0.215613	0.30494	0.046484	0.164674	0.194102	0.32142	0.313915	0.060367	0.241826	0.290443	0.353455	0.06352		0.0420983	0.042098	0.042098	0.0673163	0.030701	0.0308523	0.026721		0.085337	0.072403	0.043621	0.040036	0.050592	0.0163221	0.019348
299	19.9333	0.143092	0.163909	0.17012	0.229233	0.110511	0.251099	0.220467	0.287698	0.038839	0.170326	0.187113	0.29478	0.307323	0.065569	0.265278	0.298305	0.334048	0.089977		0.0417633	0.041763	0.041763	0.082348	0.037964	0.0274237	0.0237251		0.087968	0.067469	0.045147	0.0424918	0.032351	0.0143172	0.021588
300	20	0.129014	0.166419	0.15916	0.168512	0.132117	0.252747	0.216732	0.303551	0.04505	0.174652	0.202205	0.295285	0.308938	0.050855	0.268857	0.295575	0.342897	0.067085		0.0375	0.0375	0.0375	0.0686436	0.041167	0.0301252	0.0246533		0.116396	0.084073	0.049634	0.0521845	0.047846	0.0152064	0.021146
301	20.0667	0.137631	0.164616	0.159031	0.155669	0.136927	0.242351	0.214133	0.299566	0.037471	0.166951	0.200427	0.298125	0.285299	0.053656	0.287516	0.293777	0.354437	0.076087		0.0292326	0.029233	0.029233	0.0655125	0.036393	0.0292612	0.022293		0.099274	0.091069	0.024116	0.0591216	0.044577	0.0146039	0.022678
302	20.1333	0.147485	0.156136	0.163621	0.168999	0.089788	0.232609	0.209554	0.299002	0.039635	0.168313	0.202404	0.296167	0.297488	0.05471	0.259669	0.270125	0.383188	0.069974		0.0273382	0.027338	0.027338	0.072632	0.037148	0.0285663	0.0186028		0.083897	0.098904	0.037449	0.0385066	0.040043	0.0131771	0.017607
303	20.2	0.159595	0.163662	0.17469	0.158139	0.109693	0.233258	0.211385	0.28206	0.038447	0.160165	0.180168	0.29094	0.300754	0.046549	0.282611	0.270131	0.36555	0.079572		0.0262011	0.026201	0.026201	0.0773084	0.034577	0.0271877	0.0206851		0.09334	0.077326	0.04142	0.0416188	0.054245	0.0132459	0.018607
304	20.2667	0.172389	0.164653	0.172171	0.159813	0.113129	0.215605	0.203422	0.29689	0.045516	0.158886	0.21657	0.295674	0.294586	0.042842	0.294933	0.261218	0.340022	0.082293		0.0338779	0.033878	0.033878	0.0704517	0.034268	0.0286612	0.0196708		0.102331	0.061562	0.057221	0.0481441	0.036288	0.0144195	0.018012
305	20.3333	0.166968	0.161034	0.176715	0.204649	0.114654	0.235953	0.203264	0.294249	0.048681	0.160557	0.226087	0.304688	0.30662	0.049655	0.281806	0.280825	0.331471	0.071113		0.0302307	0.030231	0.030231	0.0721966	0.043079	0.0276631	0.0232803		0.092288	0.051106	0.037713	0.0475063	0.044435	0.0177168	0.021791
306	20.4	0.172222	0.167499	0.173944	0.212884	0.124755	0.244416	0.188818	0.299133	0.04847	0.16004	0.234588	0.297491	0.303226	0.063003	0.260579	0.296684	0.326184	0.10346		0.029249	0.029249	0.029249	0.0682959	0.034174	0.028169	0.0196078		0.098751	0.044206	0.035883	0.0551988	0.04729	0.0128443	0.021637
307	20.4667	0.170736	0.173564	0.175419	0.201904	0.111083	0.231658	0.182665	0.296961	0.067275	0.161065	0.235254	0.297368	0.323396	0.051946	0.274151	0.288384	0.345947	0.087361		0.0295124	0.029512	0.029512	0.0784396	0.035039	0.0321207	0.0208612		0.091753	0.047379	0.036416	0.0617282	0.045425	0.0128415	0.019927
308	20.5333	0.162156	0.173169	0.170994	0.203403	0.108004	0.239572	0.179281	0.291663	0.047525	0.144825	0.233492	0.294854	0.315171	0.058874	0.265595	0.285415	0.338155	0.102938		0.0359336	0.035934	0.035934	0.0856685	0.032665	0.0358674	0.0216962		0.095402	0.0505	0.028169	0.0226008	0.049046	0.0202899	0.021277
309	20.6	0.173258	0.169854	0.184827	0.205791	0.130341	0.234143	0.188425	0.298821	0.03322	0.127789	0.258898	0.282094	0.303008	0.056627	0.253881	0.295157	0.33249	0.096708		0.0303838	0.030384	0.030384	0.0798887	0.036746	0.0293887	0.0226192		0.134189	0.04578	0.047276	0.0359256	0.05569	0.0136106	0.01953
310	20.6667	0.179067	0.174286	0.175968	0.155734	0.119549	0.218868	0.170488	0.300243	0.061057	0.156824	0.252198	0.282651	0.26696	0.046824	0.22356	0.303095	0.323693	0.117453		0.0303279	0.030328	0.030328	0.0857853	0.030603	0.0259443	0.0211642		0.115145	0.043514	0.033239	0.0441235	0.047013	0.0136744	0.022083
311	20.7333	0.173709	0.175122	0.178625	0.16366	0.11707	0.223984	0.172951	0.306917	0.061257	0.19705	0.271605	0.27683	0.286643	0.043117	0.236127	0.300889	0.319662	0.09298		0.0319852	0.031985	0.031985	0.0953527	0.037745	0.0294349	0.0216719		0.118524	0.041516	0.03352	0.0516232	0.058846	0.0141583	0.022406
312	20.8	0.18209	0.172187	0.182594	0.157581	0.162944	0.225068	0.169073	0.286812	0.040458	0.222012	0.261254	0.274487	0.269039	0.052371	0.231109	0.307852	0.310743	0.099553		0.0296387	0.029639	0.029639	0.0700435	0.030932	0.0223765	0.0187336		0.083335	0.039442	0.037388	0.0305563	0.036838	0.0131532	0.021919
313	20.8667	0.175481	0.177551	0.178799	0.159803	0.109594	0.208251	0.167152	0.316476	0.046664	0.214719	0.25911	0.277883	0.275409	0.037195	0.251425	0.310858	0.30074	0.103709		0.024379	0.024379	0.024379	0.0716452	0.03668	0.0256859	0.0242756		0.091676	0.040062	0.041532	0.0500846	0.040963	0.0140325	0.020744
314	20.9333	0.172184	0.178059	0.186966	0.163951	0.167898	0.197152	0.177151	0.3404	0.056574	0.216001	0.269116	0.270018	0.284887	0.057524	0.246063	0.29561	0.318344	0.082423		0.0288274	0.028827	0.028827	0.0856622	0.039328	0.0269364	0.0244298		0.104609	0.038659	0.034995	0.0440416	0.037511	0.0156072	0.019512
315	21	0.178461	0.164518	0.195547	0.158827	0.082251	0.219163	0.166438	0.349436	0.059876	0.216212	0.261648	0.263947	0.27918	0.034894	0.255878	0.299703	0.307403	0.079709		0.0268065	0.026807	0.026807	0.0866873	0.03929	0.0260939	0.0177332		0.08853	0.041817	0.044311	0.0384007	0.035398	0.0161824	0.020293
316	21.0667	0.180258	0.184234	0.187251	0.129568	0.188295	0.221451	0.166134	0.355985	0.07838	0.202026	0.269759	0.265608	0.291189	0.043169	0.258119	0.294814	0.308858	0.100459		0.0317331	0.031733	0.031733	0.0808971	0.036707	0.0253749	0.0186049		0.09749	0.039845	0.032616	0.0482432	0.043288	0.0148857	0.019462
317	21.1333	0.188344	0.170881	0.17147	0.189371	0.142687	0.240597	0.163219	0.366332	0.034143	0.211866	0.270044	0.263254	0.280551	0.058845	0.262907	0.298496	0.323344	0.083323		0.0197707	0.019771	0.019771	0.0729549	0.030062	0.0244117	0.0244444		0.101115	0.043863	0.046279	0.0500385	0.043952	0.0154309	0.022446
318	21.2	0.183369	0.165884	0.17195	0.257517	0.167787	0.24059	0.167639	0.365415	0.03504	0.221398	0.273461	0.270386	0.277764	0.047002	0.252856	0.296035	0.348174	0.066506		0.0273973	0.027397	0.027397	0.0798424	0.033283	0.0250812	0.0244752		0.106454	0.045366	0.048637	0.0569508	0.04412	0.0150913	0.025545
319	21.2667	0.196246	0.173061	0.175819	0.269434	0.140429	0.249332	0.156451	0.36165	0.040816	0.235578	0.267688	0.285813	0.276251	0.056497	0.266475	0.29992	0.315999	0.060245		0.021238	0.021238	0.021238	0.0673676	0.026823	0.0266718	0.0208418		0.090456	0.073468	0.058116	0.0351738	0.041633	0.01411	0.023856
320	21.3333	0.19736	0.163476	0.186333	0.256545	0.12189	0.247922	0.177133	0.368259	0.028997	0.241994	0.276007	0.292495	0.274128	0.058903	0.26766	0.294719	0.333592	0.09393		0.0187251	0.018725	0.018725	0.0841838	0.035352	0.0269334	0.0260305		0.0924	0.063599	0.035736	0.0344871	0.036623	0.0156134	0.0244
321	21.4	0.197653	0.164659	0.187263	0.246665	0.12155	0.263397	0.166271	0.371719	0.044464	0.240825	0.273481	0.287062	0.285034	0.04273	0.259752	0.300227	0.333114	0.074621		0.0188151	0.018815	0.018815	0.0681252	0.035432	0.0283275	0.0200512		0.115075	0.072284	0.051437	0.0347201	0.045467	0.0156534	0.025314
322	21.4667	0.199237	0.146357	0.195636	0.259308	0.096863	0.258096	0.190757	0.390797	0.031559	0.249669	0.265665	0.28038	0.267852	0.081993	0.267101	0.30239	0.340881	0.089733		0.0307663	0.030766	0.030766	0.067842	0.039564	0.0240497	0.0226911		0.088613	0.064693	0.040307	0.0251237	0.040388	0.0236487	0.0257
323	21.5333	0.196603	0.163117	0.187063	0.260116	0.153501	0.249731	0.192339	0.380021	0.051453	0.236953	0.269195	0.285808	0.268757	0.066578	0.259698	0.292031	0.332079	0.118935		0.0205066	0.020507	0.020507	0.0767107	0.033039	0.0241815	0.024461		0.104015	0.082845	0.031183	0.0467081	0.039367	0.0119114	0.025197
324	21.6	0.207117	0.160216	0.188921	0.262753	0.093044	0.244521	0.188309	0.385446	0.025741	0.234846	0.268503	0.281898	0.258959	0.024998	0.265516	0.287208	0.32232	0.113246		0.0280048	0.028005	0.028005	0.065027	0.04058	0.0245998	0.0236924		0.091106	0.118609	0.026505	0.0282652	0.041053	0.0125369	0.02524
325	21.6667	0.207183	0.142157	0.18588	0.287969	0.133024	0.256567	0.188973	0.36875	0.04485	0.237756	0.280993	0.283481	0.296367	0.037991	0.262305	0.274995	0.312158	0.130448		0.0304267	0.030427	0.030427	0.0639706	0.034279	0.0286369	0.0219923		0.101722	0.108272	0.028647	0.0383561	0.040909	0.0175308	0.02101
326	21.7333	0.204838	0.131595	0.183767	0.279501	0.132016	0.236716	0.195321	0.357373	0.036295	0.205618	0.28013	0.287081	0.282512	0.03013	0.278775	0.27013	0.342779	0.120626		0.0228584	0.022858	0.022858	0.0619298	0.037236	0.0286767	0.0222842		0.09344	0.0992	0.04535	0.0335177	0.044501	0.0181671	0.029093
327	21.8	0.208783	0.153408	0.185499	0.271754	0.108985	0.24938	0.199368	0.361455	0.040718	0.188247	0.290394	0.294839	0.268458	0.045941	0.272917	0.25849	0.324951	0.10568		0.0266384	0.026638	0.026638	0.0692848	0.042967	0.0239403	0.0228077		0.080491	0.065121	0.05452	0.0304902	0.051292	0.0118105	0.024233
328	21.8667	0.200736	0.170944	0.181307	0.277827	0.075588	0.251463	0.204643	0.346282	0.040709	0.200256	0.284653	0.29716	0.276774	0.048218	0.26718	0.266368	0.322278	0.101433		0.0209113	0.020911	0.020911	0.0578557	0.042663	0.0264373	0.0266562		0.086186	0.061098	0.049766	0.0500796	0.04998	0.0142154	0.025058
329	21.9333	0.202089	0.154112	0.175425	0.268899	0.132866	0.250993	0.214532	0.341794	0.044333	0.180335	0.285902	0.288158	0.286318	0.034848	0.22578	0.273044	0.338641	0.112825		0.0277756	0.027776	0.027776	0.0578449	0.051001	0.023648	0.0259377		0.109775	0.066558	0.055518	0.0458252	0.043939	0.0181132	0.026056
330	22	0.196287	0.154126	0.173884	0.271965	0.139866	0.248222	0.205698	0.336452	0.040618	0.188149	0.288087	0.278014	0.25789	0.043397	0.256654	0.275993	0.290763	0.109687		0.0316056	0.031606	0.031606	0.0679131	0.048787	0.0285141	0.0238291		0.088462	0.053253	0.057166	0.0625191	0.048845	0.0171172	0.022843
331	22.0667	0.208296	0.158918	0.172695	0.273682	0.093136	0.255991	0.194384	0.344782	0.057451	0.193781	0.287844	0.276639	0.286979	0.046648	0.224805	0.267042	0.297558	0.109785		0.0247252	0.024725	0.024725	0.0537228	0.042358	0.0260458	0.0224987		0.085278	0.045238	0.048608	0.0291181	0.049173	0.016992	0.024046
332	22.1333	0.184135	0.153798	0.17245	0.256059	0.153126	0.259157	0.205913	0.333375	0.037195	0.18753	0.28607	0.262227	0.278873	0.042982	0.228839	0.273695	0.300727	0.093027		0.0232967	0.023297	0.023297	0.0593714	0.043804	0.0225564	0.0219731		0.10384	0.049923	0.052109	0.0372493	0.048996	0.0145865	0.025173
333	22.2	0.195824	0.160958	0.177295	0.262275	0.139557	0.267106	0.214056	0.353282	0.042677	0.184147	0.287914	0.275471	0.280663	0.036765	0.251685	0.264499	0.272628	0.115099		0.0291289	0.029129	0.029129	0.0637971	0.043382	0.0242947	0.0183369		0.087994	0.043736	0.046036	0.0455979	0.061971	0.0116937	0.025
334	22.2667	0.183783	0.15885	0.175026	0.26222	0.119303	0.257206	0.200523	0.364193	0.048625	0.194158	0.279909	0.278266	0.28836	0.04999	0.24262	0.273567	0.289952	0.114543		0.0289273	0.028927	0.028927	0.0573833	0.038434	0.0235557	0.0222494		0.106299	0.050442	0.035794	0.0309581	0.048076	0.0174545	0.023129
335	22.3333	0.181161	0.15011	0.182592	0.251863	0.104561	0.267241	0.210986	0.371668	0.054354	0.184415	0.2726	0.275164	0.26402	0.047149	0.223487	0.26687	0.283279	0.105024		0.0243615	0.024362	0.024362	0.0620357	0.045147	0.0285384	0.0190444		0.105923	0.041762	0.049767	0.0413079	0.052715	0.0153788	0.025371
336	22.4	0.179022	0.143839	0.172689	0.26175	0.092221	0.262034	0.20862	0.381491	0.044071	0.187751	0.269284	0.265342	0.243669	0.054626	0.224551	0.263964	0.269903	0.098284		0.0260903	0.02609	0.02609	0.0626005	0.045678	0.0259877	0.0172061		0.076848	0.0473	0.045506	0.0444068	0.06121	0.0184476	0.024438
337	22.4667	0.188431	0.140785	0.151869	0.258773	0.141487	0.25246	0.218862	0.388793	0.041356	0.187855	0.266763	0.245528	0.26197	0.053922	0.183308	0.242608	0.265839	0.092851		0.029282	0.029282	0.029282	0.0597701	0.047105	0.0221543	0.0260706		0.102968	0.034994	0.025407	0.0407134	0.046296	0.0187524	0.02335
338	22.5333	0.180196	0.15061	0.13125	0.271535	0.091833	0.258738	0.214834	0.413182	0.046388	0.188502	0.263595	0.273335	0.252054	0.049231	0.178155	0.264634	0.241399	0.09388		0.0333667	0.033367	0.033367	0.073951	0.040515	0.02396	0.0233849		0.0925	0.038573	0.034351	0.0343243	0.066079	0.0123752	0.025253
339	22.6	0.185797	0.157109	0.179993	0.278585	0.120364	0.264227	0.219636	0.399464	0.046197	0.183342	0.248546	0.269923	0.270114	0.048926	0.19985	0.24729	0.241182	0.124434		0.0261769	0.026177	0.026177	0.0573606	0.041096	0.0287044	0.0196491		0.077452	0.03628	0.033308	0.0412486	0.052163	0.0114161	0.025114
340	22.6667	0.187309	0.151573	0.185877	0.277536	0.133403	0.260833	0.203583	0.425457	0.043944	0.179357	0.205844	0.279101	0.272971	0.049599	0.169511	0.268608	0.238754	0.130074		0.028197	0.028197	0.028197	0.0668258	0.039463	0.0247867	0.0216318		0.098455	0.037262	0.020995	0.0361813	0.058059	0.0189152	0.02153
341	22.7333	0.192119	0.150111	0.182404	0.277065	0.096679	0.258859	0.204063	0.416122	0.068238	0.183564	0.235178	0.279766	0.272733	0.046147	0.187535	0.268583	0.235247	0.088229		0.0258141	0.025814	0.025814	0.0675024	0.035741	0.0243233	0.0200377		0.068263	0.037152	0.042191	0.0502555	0.05732	0.0199116	0.024224
342	22.8	0.189824	0.150645	0.185947	0.281407	0.100308	0.251956	0.205547	0.41203	0.061009	0.180988	0.258583	0.287408	0.261507	0.04068	0.171298	0.276368	0.242904	0.106352		0.0217496	0.02175	0.02175	0.0696812	0.034378	0.0226386	0.0199312		0.091479	0.030063	0.027967	0.0417311	0.051669	0.0117777	0.027668
343	22.8667	0.18535	0.147517	0.17892	0.268858	0.111433	0.24482	0.193572	0.420503	0.045248	0.196261	0.256782	0.29061	0.266325	0.050947	0.165144	0.284637	0.238627	0.150651		0.0226131	0.022613	0.022613	0.064803	0.031371	0.0264571	0.0188323		0.060961	0.033839	0.028708	0.0390223	0.058355	0.0141791	0.024357
344	22.9333	0.185971	0.136341	0.179442	0.247957	0.116238	0.239438	0.218303	0.413971	0.057586	0.202903	0.264133	0.276668	0.271619	0.050541	0.178906	0.281166	0.234502	0.147605		0.0307508	0.030751	0.030751	0.0660522	0.039577	0.0272891	0.0202363		0.092694	0.034034	0.039832	0.0450726	0.052661	0.0130725	0.022222
345	23	0.162199	0.152685	0.187115	0.255036	0.117574	0.24722	0.211928	0.389932	0.030417	0.205238	0.274246	0.299821	0.266672	0.047688	0.183201	0.239703	0.237411	0.132994		0.0269517	0.026952	0.026952	0.0586873	0.03532	0.0261115	0.0223179		0.123557	0.032208	0.033099	0.0486742	0.064646	0.0149635	0.022001
346	23.0667	0.17689	0.155844	0.183772	0.265331	0.121094	0.244611	0.212025	0.384282	0.036733	0.21338	0.272906	0.29932	0.271747	0.070668	0.185468	0.227961	0.218753	0.104397		0.0280088	0.028009	0.028009	0.0685202	0.041736	0.0258549	0.0174198		0.080162	0.045035	0.029233	0.0541172	0.060169	0.022408	0.021871
347	23.1333	0.161976	0.162658	0.189388	0.26065	0.136474	0.237394	0.208911	0.371639	0.046136	0.214616	0.274607	0.292456	0.276334	0.058715	0.206042	0.233818	0.222054	0.137044		0.0312335	0.031234	0.031234	0.0556492	0.037974	0.0249805	0.0251716		0.095508	0.042998	0.026731	0.0531763	0.063473	0.0209743	0.026467
348	23.2	0.165821	0.170893	0.190533	0.266614	0.134545	0.238174	0.213533	0.375156	0.057352	0.205419	0.289588	0.283574	0.259059	0.059743	0.208415	0.232916	0.247153	0.092483		0.028943	0.028943	0.028943	0.0613223	0.036655	0.0276126	0.0247671		0.091078	0.036957	0.031729	0.0391769	0.063616	0.0235048	0.022267
349	23.2667	0.153056	0.170159	0.192689	0.224498	0.118648	0.227857	0.223712	0.399191	0.06352	0.205592	0.292622	0.293446	0.248659	0.046148	0.236864	0.24672	0.233015	0.099274		0.0280877	0.028088	0.028088	0.0632573	0.030161	0.0254072	0.0216841		0.101455	0.044747	0.031953	0.066728	0.061937	0.0207272	0.025148
350	23.3333	0.145083	0.162973	0.193672	0.401871	0.084457	0.218151	0.223067	0.398839	0.042843	0.218654	0.283735	0.29443	0.245993	0.053397	0.230073	0.246997	0.225779	0.112447		0.0296555	0.029656	0.029656	0.0669388	0.031107	0.0276456	0.0186233		0.054987	0.042407	0.041504	0.0778189	0.057858	0.0213211	0.025929
351	23.4	0.153779	0.161347	0.192694	0.415064	0.108321	0.222752	0.218808	0.401844	0.024078	0.22244	0.250056	0.300771	0.25583	0.062956	0.21848	0.252215	0.238988	0.08809		0.0247486	0.024749	0.024749	0.0669837	0.03698	0.0273319	0.0237053		0.103781	0.056008	0.036177	0.0623718	0.068623	0.0237938	0.027212
352	23.4667	0.16371	0.162791	0.198175	0.447473	0.078177	0.215836	0.220383	0.429241	0.052865	0.219335	0.24915	0.302112	0.257232	0.059882	0.205107	0.236908	0.230904	0.102965		0.0250404	0.02504	0.02504	0.0613761	0.037274	0.0257426	0.0186366		0.086059	0.056514	0.038816	0.0512063	0.066842	0.0204577	0.024092
353	23.5333	0.167671	0.160037	0.197385	0.450516	0.107421	0.22213	0.222659	0.468867	0.042302	0.218581	0.265597	0.308189	0.344741	0.061538	0.220309	0.238462	0.246318	0.073107		0.0342868	0.034287	0.034287	0.072294	0.030508	0.0281858	0.0188012		0.086301	0.055476	0.041551	0.0399152	0.066436	0.0213488	0.027155
354	23.6	0.177056	0.155844	0.181917	0.4453	0.102297	0.230293	0.223403	0.589905	0.036952	0.224007	0.254002	0.303386	0.24093	0.054818	0.180081	0.25126	0.271216	0.092512		0.0324779	0.032478	0.032478	0.0662279	0.032857	0.0262113	0.0816583		0.057978	0.062701	0.046363	0.0456015	0.065629	0.0196507	0.023364
355	23.6667	0.191528	0.15829	0.188993	0.443611	0.106872	0.227512	0.202191	0.813682	0.02871	0.209133	0.263107	0.292189	0.234805	0.062242	0.232497	0.252586	0.260453	0.093914		0.028956	0.028956	0.028956	0.0691019	0.034509	0.0283199	0.0627496		0.079375	0.059169	0.049492	0.0324963	0.065659	0.0224182	0.025183
356	23.7333	0.192912	0.159341	0.194534	0.43538	0.112442	0.219452	0.191167	0.777905	0.060967	0.212112	0.257088	0.298868	0.233613	0.063883	0.246893	0.250425	0.247315	0.095418		0.028575	0.028575	0.028575	0.056518	0.035742	0.0300081	0.0465704		0.093594	0.068579	0.034535	0.0743017	0.068693	0.0196609	0.0241
357	23.8	0.200754	0.157484	0.190511	0.444883	0.082848	0.242724	0.196422	0.821361	0.033573	0.213652	0.25248	0.294522	0.230481	0.059667	0.259987	0.274424	0.242016	0.097064		0.0253419	0.025342	0.025342	0.0555369	0.039632	0.031445	0.0458254		0.097618	0.059684	0.053637	0.0392795	0.074095	0.0238195	0.026782
358	23.8667	0.196378	0.156915	0.189268	0.427589	0.092833	0.235719	0.198133	0.744144	0.051834	0.210202	0.259815	0.290538	0.244102	0.063689	0.271809	0.280238	0.262274	0.087039		0.0261044	0.026104	0.026104	0.0635045	0.044118	0.0316311	0.0438785		0.109513	0.04979	0.042947	0.0545098	0.08096	0.020379	0.024416
359	23.9333	0.195692	0.159919	0.190344	0.454445	0.098814	0.255157	0.198905	0.788663	0.048135	0.219303	0.271439	0.283753	0.230446	0.071176	0.277074	0.27345	0.248234	0.10172		0.0279308	0.027931	0.027931	0.064126	0.0382	0.0334661	0.0457053		0.090506	0.070429	0.050351	0.0372	0.073733	0.0230319	0.038388
360	24	0.1878	0.155733	0.178111	0.438141	0.091626	0.248399	0.189139	0.615651	0.051756	0.22834	0.270338	0.272457	0.246029	0.049804	0.288669	0.262259	0.252489	0.086229		0.0385132	0.038513	0.038513	0.0593795	0.04633	0.03125	0.0368147		0.072014	0.088793	0.054926	0.0472858	0.084416	0.021308	0.022901
361	24.0667	0.194538	0.16224	0.187219	0.323539	0.107443	0.250067	0.197692	0.656378	0.051986	0.236113	0.269911	0.269956	0.252135	0.072583	0.291916	0.260169	0.254048	0.090566		0.0227454	0.022745	0.022745	0.0606992	0.049973	0.0329969	0.0633023		0.100373	0.086905	0.049005	0.0438627	0.068289	0.0221195	0.021065
362	24.1333	0.161831	0.156865	0.185225	0.309817	0.108275	0.274241	0.201126	0.663127	0.044785	0.261952	0.271917	0.260088	0.24721	0.065866	0.30376	0.264717	0.259594	0.109131		0.0223441	0.022344	0.022344	0.0675	0.044622	0.0338063	0.0451067		0.092619	0.060427	0.042972	0.0392496	0.064267	0.0220626	0.021196
363	24.2	0.172464	0.157019	0.17017	0.294751	0.083142	0.269872	0.18138	0.608945	0.055165	0.191692	0.283442	0.246182	0.228701	0.074109	0.314972	0.268455	0.270608	0.106838		0.0203025	0.020303	0.020303	0.0711953	0.042672	0.0354021	0.0479342		0.0882	0.069336	0.046426	0.0536853	0.084428	0.0218307	0.021135
364	24.2667	0.183281	0.155762	0.161223	0.303869	0.063848	0.261961	0.179111	0.561981	0.059933	0.279744	0.287704	0.254893	0.226504	0.072914	0.308138	0.267035	0.25	0.100756		0.0331447	0.033145	0.033145	0.0718209	0.036855	0.0311042	0.0498236		0.075472	0.051964	0.03548	0.037037	0.083555	0.023145	0.019646
365	24.3333	0.189493	0.152304	0.160909	0.293114	0.143307	0.269086	0.184463	0.516173	0.05091	0.307355	0.295249	0.253055	0.245323	0.095133	0.310105	0.280713	0.2624	0.110731		0.0201871	0.020187	0.020187	0.0783229	0.050523	0.0309984	0.0406852		0.082866	0.070988	0.031698	0.051699	0.084719	0.0242052	0.022067
366	24.4	0.185886	0.157393	0.166667	0.298918	0.168036	0.260481	0.171998	0.44849	0.051946	0.303892	0.289333	0.254667	0.251144	0.125653	0.295005	0.271994	0.248858	0.109723		0.0259843	0.025984	0.025984	0.0734712	0.043847	0.0309872	0.0455889		0.059136	0.055596	0.042837	0.0559875	0.067653	0.0242978	0.021022
367	24.4667	0.196298	0.155532	0.158853	0.299532	0.137975	0.265305	0.188853	0.357972	0.025437	0.311318	0.296608	0.240241	0.251801	0.126792	0.261934	0.274916	0.257063	0.096892		0.026557	0.026557	0.026557	0.0734792	0.049794	0.0284797	0.0385993		0.085001	0.051852	0.029575	0.0640847	0.067517	0.0209272	0.023124
368	24.5333	0.18459	0.157071	0.16649	0.301308	0.163271	0.262634	0.176299	0.330484	0.039798	0.32406	0.298361	0.252016	0.260816	0.13698	0.303344	0.268946	0.252388	0.099808		0.0260104	0.02601	0.02601	0.0694087	0.047331	0.0264471	0.0385274		0.062233	0.054969	0.033386	0.0660997	0.076036	0.0234318	0.022372
369	24.6	0.189245	0.154738	0.15297	0.307712	0.181515	0.269706	0.17113	0.340364	0.032088	0.288757	0.303248	0.253331	0.265087	0.139999	0.312846	0.294841	0.245395	0.092765		0.028692	0.028692	0.028692	0.0601088	0.048197	0.0281361	0.0411721		0.066486	0.05345	0.048463	0.048519	0.071854	0.0245792	0.022584
370	24.6667	0.192713	0.155852	0.15663	0.318062	0.133022	0.265558	0.173071	0.346653	0.046852	0.28947	0.301839	0.256846	0.261009	0.113517	0.282023	0.300657	0.231841	0.096925		0.028085	0.028085	0.028085	0.0529039	0.043336	0.0279218	0.0351623		0.094048	0.046236	0.060405	0.0426232	0.068828	0.0224605	0.019829
371	24.7333	0.193884	0.155422	0.15904	0.299436	0.138319	0.246997	0.17428	0.33903	0.034391	0.277886	0.305862	0.259045	0.265913	0.090432	0.333423	0.301247	0.251323	0.076175		0.0244002	0.0244	0.0244	0.0576433	0.045161	0.0314095	0.0376993		0.070715	0.045699	0.056493	0.0310007	0.059954	0.0205053	0.020579
372	24.8	0.192866	0.150329	0.161996	0.30225	0.120999	0.244096	0.200005	0.343153	0.038771	0.327857	0.306255	0.254942	0.263351	0.081786	0.322941	0.302922	0.238148	0.108285		0.0273556	0.027356	0.027356	0.0472944	0.043687	0.0267141	0.0402469		0.071457	0.041786	0.062379	0.054683	0.076744	0.0219702	0.01939
373	24.8667	0.190973	0.149533	0.161001	0.317819	0.099118	0.254256	0.195486	0.333992	0.038156	0.29881	0.312068	0.241925	0.254224	0.064819	0.298982	0.310591	0.227335	0.1116		0.0353025	0.035303	0.035303	0.0567031	0.036244	0.0275862	0.0367156		0.062178	0.052133	0.048993	0.0360137	0.065629	0.024055	0.022382
374	24.9333	0.191743	0.151611	0.152864	0.321328	0.084263	0.255873	0.197757	0.327804	0.018093	0.309958	0.318209	0.236633	0.258144	0.05895	0.291829	0.311819	0.236961	0.097331		0.0220783	0.022078	0.022078	0.0585045	0.03957	0.0279248	0.0333689		0.090512	0.043082	0.060245	0.048813	0.059735	0.0220854	0.020556
375	25	0.190945	0.152995	0.153132	0.320553	0.098349	0.269636	0.19483	0.331838	0.039711	0.301732	0.314235	0.237845	0.258994	0.072162	0.320039	0.313452	0.247424	0.110592		0.0238559	0.023856	0.023856	0.0537174	0.037677	0.0282805	0.0347215		0.085904	0.047514	0.055039	0.0370552	0.059158	0.0256452	0.017748
376	25.0667	0.19187	0.148157	0.152585	0.314213	0.135777	0.275856	0.19664	0.33564	0.038259	0.302003	0.31062	0.230485	0.264274	0.057103	0.316983	0.317465	0.242376	0.102489		0.0334433	0.033443	0.033443	0.0481123	0.035463	0.0266415	0.0387447		0.078524	0.037908	0.044112	0.0341676	0.056868	0.0226682	0.018978
377	25.1333	0.186473	0.147869	0.151729	0.31942	0.107362	0.271848	0.204368	0.333716	0.026174	0.293769	0.31153	0.22324	0.261958	0.08004	0.338725	0.331546	0.234967	0.09643		0.0289397	0.02894	0.02894	0.047729	0.038412	0.0306202	0.031564		0.078033	0.042526	0.041227	0.0279943	0.063078	0.0240418	0.02079
378	25.2	0.19306	0.150846	0.151304	0.315322	0.104019	0.27911	0.196532	0.336015	0.039104	0.273366	0.310447	0.200668	0.268174	0.086512	0.329082	0.333651	0.223881	0.156599		0.0211346	0.021135	0.021135	0.0445975	0.040408	0.0286711	0.0333723		0.053218	0.034209	0.030934	0.0345794	0.060889	0.0235582	0.022536
379	25.2667	0.183967	0.15	0.152208	0.304376	0.115805	0.285962	0.188889	0.343967	0.023192	0.270816	0.304407	0.206754	0.236278	0.068977	0.29723	0.324173	0.225392	0.116408		0.0275148	0.027515	0.027515	0.0452489	0.035147	0.028695	0.032723		0.057722	0.026965	0.055515	0.0434744	0.058626	0.0213884	0.022467
380	25.3333	0.178234	0.145501	0.151446	0.297441	0.133672	0.271631	0.19208	0.336818	0.041023	0.305539	0.304348	0.207998	0.241807	0.061353	0.306892	0.319666	0.231591	0.10421		0.0343415	0.034342	0.034342	0.0523314	0.037407	0.0320455	0.0330721		0.073408	0.03263	0.026581	0.0655789	0.057168	0.0247312	0.02133
381	25.4	0.17635	0.140577	0.146882	0.303757	0.108019	0.284274	0.197636	0.33077	0.035182	0.329265	0.315018	0.188791	0.235264	0.069135	0.285332	0.314428	0.218174	0.12187		0.0315018	0.031502	0.031502	0.0467927	0.034195	0.0322706	0.0328028		0.083647	0.031621	0.031856	0.0370897	0.057542	0.0224079	0.019754
382	25.4667	0.174543	0.145711	0.147309	0.291787	0.11819	0.273546	0.197853	0.323554	0.032268	0.333158	0.305352	0.185661	0.239448	0.072969	0.272104	0.314345	0.223417	0.124207		0.0283825	0.028383	0.028383	0.0577175	0.037453	0.0286911	0.0337964		0.081408	0.024022	0.034007	0.0405903	0.054051	0.0252194	0.02218
383	25.5333	0.19118	0.141021	0.151831	0.296178	0.173502	0.273909	0.19186	0.327646	0.044293	0.334463	0.304543	0.186777	0.225928	0.072963	0.273619	0.308642	0.23559	0.118323		0.028526	0.028526	0.028526	0.0515325	0.036388	0.0277548	0.0394223		0.091516	0.031794	0.039531	0.0346598	0.065346	0.0221363	0.019736
384	25.6	0.185452	0.137601	0.150699	0.279438	0.130412	0.266639	0.191657	0.336306	0.030034	0.334405	0.296365	0.184179	0.248573	0.08058	0.268691	0.323398	0.253045	0.094363		0.0371025	0.037103	0.037103	0.0561009	0.038934	0.0248068	0.0349505		0.064591	0.028774	0.034992	0.0474452	0.05591	0.0256748	0.023976
385	25.6667	0.190445	0.147338	0.145725	0.280079	0.124966	0.258417	0.200479	0.316079	0.04154	0.3227	0.274029	0.184534	0.237644	0.066259	0.268519	0.309676	0.252303	0.094157		0.0292221	0.029222	0.029222	0.0560818	0.03124	0.0239485	0.0347277		0.060424	0.033308	0.034221	0.0389582	0.059266	0.0252225	0.019631
386	25.7333	0.178679	0.135911	0.148817	0.27899	0.108283	0.230213	0.194305	0.313761	0.036922	0.336339	0.27854	0.190046	0.237993	0.077624	0.258248	0.311531	0.245741	0.090762		0.0319535	0.031954	0.031954	0.0551921	0.032041	0.0300535	0.0356779		0.074505	0.031845	0.036812	0.0356694	0.053134	0.0261868	0.019498
387	25.8	0.182054	0.148337	0.141212	0.284304	0.171414	0.229791	0.190863	0.322269	0.048792	0.340336	0.286271	0.19098	0.239849	0.064662	0.246057	0.304442	0.259874	0.094724		0.0331313	0.033131	0.033131	0.0544413	0.029913	0.0268107	0.0326963		0.077326	0.037952	0.045515	0.0382003	0.050743	0.0240919	0.021558
388	25.8667	0.183403	0.144068	0.14326	0.280852	0.15323	0.224448	0.177928	0.32551	0.045729	0.334843	0.27403	0.188736	0.241678	0.062497	0.265885	0.303197	0.248303	0.082322		0.0341494	0.034149	0.034149	0.054283	0.034352	0.0280297	0.0334452		0.084372	0.038864	0.038777	0.029661	0.065646	0.0243991	0.020857
389	25.9333	0.185751	0.143366	0.146191	0.279581	0.156387	0.219774	0.176093	0.339813	0.041022	0.342938	0.295816	0.225281	0.243167	0.071943	0.252473	0.293473	0.237695	0.110527		0.0332399	0.03324	0.03324	0.0490374	0.041716	0.0246227	0.0400471		0.074001	0.035628	0.03821	0.0574754	0.063289	0.0253	0.019973
390	26	0.183594	0.140552	0.144614	0.274531	0.19787	0.2233	0.193495	0.326375	0.041464	0.321187	0.2862	0.226029	0.246231	0.063029	0.26846	0.292163	0.23257	0.09652		0.0352447	0.035245	0.035245	0.0557385	0.032706	0.0241923	0.0328131		0.066244	0.034384	0.051774	0.0485573	0.055579	0.0265648	0.02037
391	26.0667	0.186235	0.140712	0.147618	0.272357	0.122854	0.23392	0.182535	0.34871	0.052731	0.306673	0.289875	0.232037	0.245725	0.073634	0.291166	0.293731	0.211619	0.129063		0.0342298	0.03423	0.03423	0.0588685	0.038387	0.0210987	0.0319274		0.076584	0.036305	0.040958	0.0408393	0.05652	0.0261274	0.018896
392	26.1333	0.189589	0.144892	0.13255	0.289959	0.129101	0.244951	0.189682	0.326049	0.051999	0.311216	0.295571	0.227724	0.240846	0.076413	0.279047	0.28791	0.212305	0.101183		0.0316832	0.031683	0.031683	0.0528133	0.040338	0.0223217	0.0343762		0.078247	0.03654	0.035512	0.0485246	0.057217	0.0281227	0.024071
393	26.2	0.191036	0.1366	0.147736	0.270783	0.09148	0.272629	0.18319	0.327434	0.041283	0.309225	0.291245	0.225482	0.238044	0.066802	0.26875	0.288973	0.215793	0.132824		0.0295103	0.02951	0.02951	0.0571662	0.031143	0.0260458	0.0326252		0.075565	0.032618	0.046485	0.0393027	0.050953	0.0292419	0.019252
394	26.2667	0.199947	0.140443	0.133606	0.264609	0.093969	0.261306	0.185802	0.322688	0.051796	0.310551	0.290121	0.224805	0.249356	0.061184	0.282606	0.289608	0.189396	0.108838		0.0267302	0.02673	0.02673	0.0558313	0.031879	0.0237889	0.0387931		0.075163	0.034637	0.037842	0.0366445	0.05	0.0286194	0.017544
395	26.3333	0.188652	0.138198	0.152151	0.254015	0.086132	0.267525	0.194556	0.315543	0.049309	0.313775	0.31049	0.231991	0.233988	0.067426	0.285059	0.284242	0.204623	0.113079		0.0283854	0.028385	0.028385	0.0555369	0.036556	0.0246628	0.0331436		0.082442	0.033784	0.042164	0.0572939	0.053094	0.030501	0.022172
396	26.4	0.195558	0.130147	0.151812	0.290257	0.102305	0.286548	0.198542	0.305662	0.048189	0.298605	0.302354	0.251224	0.236123	0.035598	0.337303	0.278651	0.207371	0.118802		0.0360134	0.036013	0.036013	0.059071	0.03393	0.0212264	0.0325353		0.07772	0.035106	0.045056	0.0579757	0.068321	0.0283587	0.020884
397	26.4667	0.199754	0.150657	0.159085	0.290628	0.085611	0.286243	0.191117	0.294192	0.055161	0.280306	0.306566	0.245562	0.25449	0.049842	0.291036	0.277997	0.196158	0.122498		0.0343766	0.034377	0.034377	0.0546141	0.032432	0.0255387	0.0289453		0.085925	0.039108	0.041183	0.0426563	0.063383	0.0253863	0.020886
398	26.5333	0.19868	0.156956	0.139857	0.291971	0.10753	0.26382	0.199378	0.287367	0.04614	0.265614	0.306218	0.254062	0.252933	0.054744	0.305472	0.282442	0.189803	0.123074		0.0300041	0.030004	0.030004	0.0660446	0.038585	0.0211295	0.0298965		0.113127	0.03108	0.042382	0.0322936	0.052479	0.0278683	0.020453
399	26.6	0.195082	0.163962	0.178062	0.28476	0.073907	0.268558	0.203246	0.266704	0.043412	0.275642	0.29714	0.229592	0.248623	0.061969	0.32527	0.278439	0.187799	0.120487		0.0367371	0.036737	0.036737	0.0611154	0.036131	0.0223511	0.0302164		0.08752	0.047019	0.034539	0.0333618	0.051322	0.0302258	0.019275
400	26.6667	0.198503	0.166953	0.181495	0.290076	0.148805	0.280419	0.190971	0.264543	0.059345	0.282579	0.290392	0.235393	0.258541	0.068877	0.303566	0.279846	0.197347	0.104888		0.0335962	0.033596	0.033596	0.0642257	0.038043	0.0215666	0.0277962		0.113276	0.034598	0.05056	0.029845	0.053394	0.0287901	0.021555
401	26.7333	0.19551	0.164484	0.180115	0.288895	0.136052	0.285304	0.202628	0.263724	0.04708	0.258429	0.29633	0.242203	0.238806	0.051659	0.242394	0.273768	0.199534	0.116217		0.0369437	0.036944	0.036944	0.0529778	0.038489	0.0264405	0.0262243		0.10218	0.037276	0.057865	0.0392427	0.054109	0.0321101	0.022028
402	26.8	0.195848	0.157237	0.167649	0.289002	0.122684	0.287739	0.186576	0.239381	0.053566	0.260317	0.295766	0.242589	0.245382	0.072331	0.249767	0.272683	0.190925	0.133987		0.0439024	0.043902	0.043902	0.0592175	0.038062	0.0246032	0.0289157		0.090584	0.032438	0.046726	0.0681888	0.048473	0.0347092	0.02082
403	26.8667	0.189068	0.161701	0.161853	0.290357	0.115595	0.296487	0.192833	0.25503	0.051592	0.253375	0.286169	0.244467	0.250288	0.057705	0.252252	0.276593	0.168387	0.11313		0.0440297	0.04403	0.04403	0.0701906	0.040661	0.0248099	0.0325291		0.104522	0.045167	0.055385	0.0501905	0.057761	0.0326618	0.021484
404	26.9333	0.195861	0.156386	0.160214	0.28081	0.11481	0.282082	0.180886	0.268169	0.047851	0.239633	0.295578	0.260464	0.254461	0.066573	0.263425	0.280516	0.144064	0.105581		0.0320877	0.032088	0.032088	0.0707033	0.041265	0.0235788	0.0317092		0.118567	0.031334	0.041221	0.0384408	0.054992	0.0287278	0.02226
405	27	0.205496	0.157073	0.156923	0.287911	0.133617	0.294699	0.181356	0.273987	0.052276	0.267344	0.293011	0.249566	0.259707	0.081934	0.250833	0.274729	0.216457	0.128226		0.0320999	0.0321	0.0321	0.0728291	0.039514	0.0285677	0.0328527		0.092921	0.038742	0.047562	0.0438251	0.060571	0.033115	0.022753
406	27.0667	0.195665	0.152624	0.158652	0.120546	0.12693	0.276126	0.176638	0.291361	0.043545	0.24626	0.282876	0.252755	0.258026	0.063795	0.235155	0.27195	0.215863	0.112917		0.0336404	0.03364	0.03364	0.0703722	0.037399	0.0253313	0.0325326		0.134607	0.035683	0.060098	0.0499517	0.05737	0.0352564	0.022684
407	27.1333	0.196604	0.145019	0.153904	0.111957	0.102752	0.266574	0.173081	0.299027	0.049102	0.268174	0.297164	0.26879	0.257899	0.048308	0.243631	0.258876	0.223831	0.105946		0.0313725	0.031373	0.031373	0.0739284	0.043593	0.0254802	0.0318367		0.086001	0.039531	0.030803	0.0363582	0.056879	0.0298884	0.024105
408	27.2	0.194301	0.143344	0.153194	0.119538	0.132847	0.26704	0.163726	0.292	0.046311	0.274738	0.28894	0.261672	0.26744	0.053865	0.258176	0.232759	0.225442	0.127951		0.0441093	0.044109	0.044109	0.0653749	0.044359	0.0280522	0.0330148		0.099542	0.045002	0.038116	0.042582	0.052897	0.0796663	0.02423
409	27.2667	0.19187	0.150901	0.153088	0.113237	0.13339	0.270828	0.15206	0.300414	0.042454	0.267469	0.297903	0.252805	0.261217	0.059464	0.245354	0.238855	0.241434	0.123961		0.0359589	0.035959	0.035959	0.0622102	0.038329	0.0280703	0.0389864		0.08166	0.036895	0.038542	0.0451773	0.060422	0.0850769	0.021084
410	27.3333	0.195609	0.156133	0.150986	0.15465	0.098453	0.274247	0.158803	0.318625	0.040796	0.266468	0.293734	0.25246	0.266661	0.053438	0.241934	0.244964	0.220998	0.108236		0.0466403	0.04664	0.04664	0.0588235	0.034826	0.0269598	0.0317972		0.096257	0.037638	0.044646	0.0294222	0.059256	0.110514	0.026408
411	27.4	0.196454	0.151051	0.151618	0.178252	0.123368	0.275757	0.153519	0.30632	0.06341	0.267814	0.297271	0.229751	0.259383	0.068058	0.273929	0.245495	0.212606	0.123386		0.0359451	0.035945	0.035945	0.0651441	0.039955	0.0275407	0.0350476		0.066796	0.038432	0.049499	0.0359738	0.060697	0.122938	0.024363
412	27.4667	0.191919	0.152465	0.150685	0.368647	0.106343	0.26647	0.151254	0.311308	0.0277	0.268074	0.285201	0.238788	0.27109	0.077564	0.260661	0.247643	0.208003	0.124362		0.0432789	0.043279	0.043279	0.070163	0.038088	0.0332666	0.0336269		0.091158	0.043445	0.048453	0.0544514	0.056647	0.148172	0.023408
413	27.5333	0.170742	0.14862	0.123419	0.434685	0.106422	0.25641	0.148575	0.293079	0.053872	0.273129	0.28411	0.238479	0.275792	0.078343	0.2572	0.280543	0.217844	0.116293		0.04485	0.04485	0.04485	0.075084	0.038884	0.0325139	0.0398424		0.060545	0.03708	0.038031	0.0543867	0.054869	0.157966	0.027944
414	27.6	0.16916	0.150343	0.151059	0.306539	0.131635	0.258892	0.142571	0.320089	0.037075	0.277047	0.282454	0.23327	0.270272	0.076676	0.254197	0.264628	0.226262	0.123691		0.0239276	0.023928	0.023928	0.0680045	0.041952	0.030822	0.0417027		0.080159	0.030269	0.03613	0.0429415	0.056101	0.154002	0.022365
415	27.6667	0.173806	0.151542	0.155138	0.240402	0.120571	0.268502	0.145386	0.308763	0.034363	0.280172	0.298036	0.230511	0.281357	0.067804	0.259132	0.277378	0.226611	0.130855		0.0434279	0.043428	0.043428	0.0759984	0.036349	0.0255667	0.0389349		0.089857	0.037152	0.03537	0.0334784	0.054307	0.152069	0.021273
416	27.7333	0.177271	0.152196	0.154647	0.242616	0.126139	0.256692	0.147262	0.304614	0.061242	0.279023	0.287663	0.231211	0.288281	0.080818	0.270993	0.280697	0.243659	0.137049		0.0325792	0.032579	0.032579	0.0797546	0.036464	0.0293069	0.0481811		0.078169	0.043967	0.041565	0.0416412	0.053107	0.162303	0.020916
417	27.8	0.180706	0.15403	0.167059	0.246285	0.139529	0.242209	0.146782	0.29648	0.034962	0.279748	0.29497	0.23917	0.281979	0.053191	0.242473	0.28949	0.231219	0.132981		0.0393981	0.039398	0.039398	0.0857884	0.035114	0.0305658	0.0458461		0.061595	0.034008	0.042487	0.0311493	0.060568	0.125564	0.018144
418	27.8667	0.186567	0.152638	0.166223	0.234416	0.139829	0.240605	0.148686	0.2916	0.026983	0.291287	0.303493	0.24078	0.276033	0.063717	0.251176	0.285545	0.251266	0.14374		0.03335	0.03335	0.03335	0.0762957	0.038043	0.0286511	0.0599467		0.067977	0.032875	0.03586	0.0396639	0.060508	0.114623	0.018449
419	27.9333	0.193264	0.153176	0.162802	0.241448	0.125819	0.234728	0.133029	0.285772	0.047598	0.293693	0.298172	0.262809	0.257086	0.051097	0.255015	0.29383	0.256428	0.12515		0.0399785	0.039979	0.039979	0.079036	0.036343	0.0306002	0.0483997		0.073161	0.029152	0.035266	0.0311218	0.054226	0.0809654	0.017713
420	28	0.193158	0.157848	0.156299	0.251052	0.139237	0.231423	0.144458	0.287002	0.046802	0.304648	0.302185	0.216914	0.260385	0.07772	0.247969	0.280721	0.268092	0.127668		0.0278391	0.027839	0.027839	0.0707335	0.033055	0.035839	0.0464372		0.097045	0.037747	0.040161	0.0361727	0.06609	0.0829546	0.017612
421	28.0667	0.195871	0.157926	0.155352	0.248131	0.154916	0.242231	0.132387	0.284661	0.048006	0.314242	0.293055	0.268025	0.253521	0.052349	0.257395	0.288842	0.27681	0.12483		0.0236975	0.023698	0.023698	0.0650389	0.034626	0.0306768	0.0458453		0.082229	0.031489	0.041387	0.0433391	0.06748	0.0581683	0.017208
422	28.1333	0.184397	0.158044	0.15324	0.25218	0.134008	0.249271	0.131735	0.284466	0.055128	0.322332	0.308785	0.256883	0.250026	0.062925	0.249665	0.298054	0.268756	0.130773		0.0289508	0.028951	0.028951	0.0709972	0.037817	0.0298051	0.0384143		0.072144	0.038093	0.059883	0.0308136	0.072998	0.0796527	0.013616
423	28.2	0.177834	0.161536	0.161742	0.252301	0.119241	0.250286	0.134944	0.285073	0.026232	0.314251	0.311265	0.26617	0.248102	0.081	0.259836	0.293862	0.264746	0.115647		0.0406133	0.040613	0.040613	0.0619561	0.03943	0.0299885	0.0491071		0.110322	0.040025	0.060255	0.0429774	0.074621	0.0530769	0.032124
424	28.2667	0.17661	0.1574	0.158422	0.252696	0.097519	0.243325	0.124741	0.293486	0.049843	0.315617	0.300285	0.268561	0.256276	0.068182	0.245175	0.283974	0.254749	0.12628		0.0347373	0.034737	0.034737	0.0568272	0.042425	0.0305772	0.0548307		0.088365	0.046024	0.054627	0.0533644	0.079728	0.0508946	0.024025
425	28.3333	0.172175	0.159284	0.163115	0.253627	0.183627	0.250424	0.11989	0.289633	0.042504	0.318923	0.293572	0.267155	0.256325	0.069638	0.230115	0.287459	0.267684	0.120015		0.0423735	0.042374	0.042374	0.0528753	0.037065	0.0286668	0.0480248		0.094679	0.045208	0.046486	0.0385029	0.074532	0.0617236	0.035909
426	28.4	0.179049	0.154282	0.167623	0.255523	0.110309	0.235621	0.141073	0.287611	0.036474	0.323535	0.291236	0.291743	0.257762	0.075288	0.237701	0.276258	0.267078	0.137889		0.0322851	0.032285	0.032285	0.0541838	0.033527	0.0298712	0.0557868		0.082702	0.040199	0.039941	0.0395483	0.081513	0.0675654	0.028825
427	28.4667	0.172471	0.153656	0.166129	0.252859	0.115646	0.249859	0.145554	0.29141	0.036342	0.32321	0.28939	0.306953	0.260387	0.073379	0.23126	0.289055	0.267186	0.137239		0.0308769	0.030877	0.030877	0.057243	0.033597	0.0278356	0.0502398		0.110079	0.037715	0.029278	0.0362845	0.079294	0.0508084	0.023693
428	28.5333	0.171961	0.162903	0.165423	0.256194	0.141888	0.240958	0.135992	0.294357	0.031179	0.307152	0.278645	0.301323	0.264062	0.062193	0.245031	0.289151	0.262118	0.125078		0.0294118	0.029412	0.029412	0.0615464	0.031862	0.0258065	0.0585083		0.082674	0.043676	0.06141	0.0367239	0.077056	0.0668203	0.02125
429	28.6	0.167751	0.163744	0.166402	0.268594	0.122743	0.23776	0.130767	0.30482	0.021003	0.299391	0.292394	0.293853	0.263822	0.048164	0.218128	0.297081	0.258956	0.095647		0.035013	0.035013	0.035013	0.0559456	0.034393	0.0291741	0.0467657		0.11266	0.039681	0.029368	0.059368	0.081182	0.0792308	0.037593
430	28.6667	0.169012	0.158836	0.166913	0.276797	0.125013	0.243254	0.134251	0.29548	0.034179	0.284271	0.300588	0.307883	0.266848	0.064767	0.233964	0.295942	0.260598	0.08615		0.0283924	0.028392	0.028392	0.0656106	0.043053	0.0238185	0.04872		0.092976	0.043412	0.039744	0.0412075	0.078514	0.0746795	0.024504
431	28.7333	0.168742	0.161038	0.166936	0.278421	0.120113	0.244265	0.138012	0.307527	0.039036	0.25697	0.302221	0.296452	0.251571	0.057678	0.219643	0.301164	0.262916	0.088703		0.0219708	0.021971	0.021971	0.0527038	0.042007	0.02943	0.0425777		0.093805	0.046186	0.033347	0.0324181	0.077097	0.065442	0.021815
432	28.8	0.172032	0.164135	0.158882	0.285753	0.120279	0.240864	0.136546	0.308706	0.027161	0.251478	0.317453	0.288079	0.275423	0.053729	0.216776	0.297844	0.252828	0.091419		0.0225094	0.022509	0.022509	0.0520575	0.033585	0.0299224	0.0617391		0.101605	0.044073	0.023098	0.0377145	0.093298	0.0688213	0.029088
433	28.8667	0.172112	0.160917	0.159315	0.284545	0.116071	0.22515	0.134391	0.308702	0.03744	0.239797	0.316254	0.290966	0.265706	0.070151	0.217045	0.296678	0.250276	0.097334		0.0338776	0.033878	0.033878	0.0560869	0.045469	0.0257712	0.0478413		0.084513	0.051087	0.037276	0.0324024	0.07911	0.0670803	0.022532
434	28.9333	0.174212	0.167327	0.158657	0.286874	0.133758	0.216724	0.139589	0.319229	0.047952	0.256597	0.321755	0.282492	0.273928	0.062827	0.218227	0.296084	0.249986	0.081307		0.0268951	0.026895	0.026895	0.0620155	0.040472	0.022503	0.0439538		0.093969	0.043883	0.020629	0.0365112	0.076207	0.076529	0.022861
435	29	0.174937	0.154381	0.156869	0.295753	0.071771	0.213944	0.149582	0.31288	0.048496	0.239434	0.29428	0.254049	0.26612	0.066946	0.168653	0.297927	0.246841	0.084458		0.0341508	0.034151	0.034151	0.0486895	0.038218	0.0260796	0.0481961		0.081537	0.036454	0.046714	0.045929	0.081319	0.0654773	0.027778
436	29.0667	0.168911	0.156655	0.15873	0.301446	0.082784	0.203149	0.144754	0.315139	0.041287	0.243095	0.289494	0.270087	0.272758	0.06195	0.192638	0.304549	0.245963	0.087475		0.0268771	0.026877	0.026877	0.0545194	0.037094	0.0274154	0.0419431		0.044061	0.04391	0.045777	0.0547593	0.080187	0.0678788	0.023997
437	29.1333	0.170638	0.159278	0.160406	0.291531	0.161015	0.201303	0.148954	0.287672	0.048181	0.25665	0.324166	0.266194	0.267176	0.051308	0.228973	0.308938	0.240579	0.063089		0.0285463	0.028546	0.028546	0.0584772	0.039697	0.0258014	0.0355657		0.055842	0.039024	0.029694	0.0370066	0.074033	0.062974	0.018978
438	29.2	0.176861	0.158318	0.159052	0.282247	0.068357	0.230844	0.110075	0.294117	0.03092	0.260622	0.209788	0.239886	0.255654	0.05647	0.233078	0.311809	0.245308	0.059608		0.0318926	0.031893	0.031893	0.058011	0.040462	0.0247713	0.0409125		0.08406	0.036574	0.03488	0.0357149	0.073814	0.0551884	0.023337
439	29.2667	0.178302	0.158792	0.160383	0.281575	0.08974	0.234718	0.157129	0.293665	0.050603	0.262721	0.307959	0.237414	0.258788	0.081595	0.234044	0.317151	0.235861	0.070408		0.0267759	0.026776	0.026776	0.0632298	0.036117	0.0290742	0.0424098		0.060953	0.040936	0.050699	0.035833	0.075363	0.0490957	0.018624
440	29.3333	0.181805	0.156756	0.158437	0.273788	0.116241	0.248329	0.151991	0.298743	0.043651	0.244774	0.335878	0.23205	0.255954	0.0468	0.222366	0.322111	0.250777	0.076734		0.0327124	0.032712	0.032712	0.0650658	0.03818	0.0222116	0.0307287		0.071852	0.034966	0.047763	0.0621811	0.080769	0.0528963	0.01633
441	29.4	0.171849	0.151889	0.160028	0.265526	0.120555	0.241081	0.152392	0.287526	0.030648	0.252566	0.323825	0.236422	0.248584	0.035951	0.242143	0.326115	0.276408	0.069012		0.0261464	0.026146	0.026146	0.067135	0.032731	0.0267709	0.0334477		0.081059	0.037172	0.045062	0.0392217	0.070546	0.0479441	0.025462
442	29.4667	0.170592	0.149759	0.15594	0.243821	0.095277	0.243967	0.158525	0.287988	0.054883	0.246431	0.335826	0.239748	0.226966	0.036056	0.247923	0.318924	0.262902	0.092373		0.0342666	0.034267	0.034267	0.0484069	0.036722	0.0254173	0.038642		0.056694	0.038914	0.050533	0.0278663	0.060531	0.0524182	0.024104
443	29.5333	0.171135	0.158598	0.163202	0.247799	0.153166	0.267982	0.162219	0.292688	0.058557	0.249637	0.313919	0.221202	0.231395	0.026342	0.278478	0.322211	0.258168	0.060773		0.0304735	0.030474	0.030474	0.0552977	0.045002	0.0240272	0.0369536		0.076413	0.031023	0.054123	0.0423684	0.076672	0.0499026	0.020469
444	29.6	0.169643	0.148448	0.156389	0.23822	0.140235	0.258267	0.166237	0.284019	0.044576	0.236683	0.304231	0.223362	0.236676	0.318891	0.224875	0.324343	0.25704	0.074781		0.0334321	0.033432	0.033432	0.0585619	0.041543	0.0248423	0.0369515		0.07509	0.032838	0.067817	0.0388203	0.065829	0.0552076	0.019587
445	29.6667	0.173024	0.158759	0.160697	0.237357	0.117839	0.269427	0.160913	0.301093	0.045212	0.228665	0.289255	0.224612	0.237373	0.061802	0.251953	0.315522	0.245173	0.094108		0.0306796	0.03068	0.03068	0.0599299	0.032646	0.0232471	0.0407678		0.062319	0.032836	0.048097	0.0330661	0.058188	0.0532101	0.017223
446	29.7333	0.168789	0.155535	0.161055	0.235259	0.111111	0.250087	0.158993	0.293141	0.041139	0.212371	0.303347	0.229226	0.251466	0.036311	0.271069	0.309958	0.241205	0.077743		0.0267404	0.02674	0.02674	0.0559201	0.037523	0.024864	0.0378085		0.081101	0.037093	0.047485	0.0544176	0.060737	0.0539813	0.023043
447	29.8	0.170378	0.15203	0.142157	0.23064	0.119744	0.260821	0.168786	0.293147	0.044613	0.228084	0.298635	0.21307	0.238046	0.029723	0.288335	0.310205	0.283672	0.088447		0.0296857	0.029686	0.029686	0.0591806	0.038426	0.0235562	0.0355943		0.086015	0.040515	0.050853	0.0537551	0.06454	0.0622186	0.020129
448	29.8667	0.168893	0.144712	0.149858	0.21529	0.093558	0.251838	0.16076	0.304464	0.036623	0.21973	0.286693	0.226469	0.252523	0.061917	0.277203	0.313936	0.277915	0.077788		0.0279081	0.027908	0.027908	0.0698815	0.038089	0.0208245	0.0329317		0.067453	0.032308	0.064593	0.0461629	0.054853	0.0600043	0.023618
449	29.9333	0.171548	0.146316	0.125741	0.226557	0.104199	0.249118	0.162414	0.300658	0.057384	0.205119	0.293707	0.231804	0.258115	0.041382	0.270186	0.289967	0.281496	0.07465		0.0316742	0.031674	0.031674	0.0542198	0.034179	0.0218978	0.0378168		0.063437	0.035348	0.077971	0.0507712	0.059332	0.0726965	0.035811
450	30	0.175111	0.131832	0.155097	0.218845	0.12469	0.236315	0.163111	0.30944	0.04848	0.221336	0.29478	0.214908	0.24363	0.051161	0.281091	0.282749	0.275184	0.088627		0.033563	0.033563	0.033563	0.0661655	0.037707	0.022043	0.0313806		0.073266	0.033182	0.050475	0.0516975	0.052101	0.0688756	0.03882
451	30.0667	0.171884	0.132648	0.147516	0.218028	0.087857	0.229383	0.156159	0.295192	0.048578	0.21856	0.29846	0.230985	0.249722	0.05022	0.29867	0.271215	0.272692	0.096822		0.0317542	0.031754	0.031754	0.0644673	0.033345	0.0227623	0.0340849		0.076573	0.033712	0.054257	0.0480216	0.061049	0.0291715	0.039322
452	30.1333	0.183673	0.148441	0.165493	0.222152	0.134258	0.235684	0.152086	0.303244	0.033691	0.214103	0.291912	0.219035	0.251602	0.049207	0.303626	0.268877	0.26201	0.098759		0.029485	0.029485	0.029485	0.0627679	0.035911	0.0210289	0.0291222		0.082846	0.028875	0.049577	0.0541612	0.048631	0.0367076	0.0204
453	30.2	0.178373	0.155131	0.1578	0.227734	0.137663	0.219293	0.157235	0.302396	0.029975	0.211149	0.289694	0.211638	0.260649	0.068817	0.299562	0.237333	0.266414	0.090747		0.0232655	0.023266	0.023266	0.0592981	0.037446	0.0255064	0.031676		0.066169	0.032762	0.034437	0.0445145	0.056293	0.0301961	0.021041
454	30.2667	0.177531	0.151187	0.165169	0.219503	0.141787	0.226489	0.149388	0.296893	0.060558	0.208648	0.286483	0.223816	0.255285	0.064311	0.290666	0.248095	0.230673	0.094932		0.0222129	0.022213	0.022213	0.0626057	0.036585	0.0250675	0.0306608		0.074781	0.032232	0.049961	0.058846	0.057756	0.0328426	0.022173
455	30.3333	0.180127	0.150774	0.174444	0.228807	0.11099	0.223158	0.155088	0.29967	0.032805	0.191417	0.274462	0.226143	0.2517	0.059662	0.212685	0.252677	0.228782	0.086649		0.0316373	0.031637	0.031637	0.0678501	0.032404	0.0222917	0.0296733		0.060224	0.032597	0.047162	0.0420548	0.057974	0.0389817	0.021651
456	30.4	0.180968	0.155411	0.168112	0.240866	0.082727	0.218444	0.14883	0.300173	0.042545	0.184293	0.284251	0.226689	0.25	0.074578	0.277686	0.257297	0.239601	0.081599		0.0319557	0.031956	0.031956	0.0798479	0.040034	0.0246881	0.0327869		0.060721	0.035606	0.0298	0.0389703	0.05683	0.0348337	0.019242
457	30.4667	0.184874	0.159799	0.16993	0.235097	0.102865	0.211765	0.163672	0.308041	0.036406	0.16628	0.298829	0.224309	0.263398	0.064936	0.253391	0.249358	0.186865	0.103656		0.0207328	0.020733	0.020733	0.0661793	0.039071	0.0217602	0.03425		0.074895	0.031579	0.03447	0.0349617	0.056274	0.0422366	0.021703
458	30.5333	0.18274	0.159038	0.167157	0.243902	0.151411	0.219506	0.160156	0.284355	0.060317	0.168934	0.313465	0.232126	0.259881	0.059765	0.234702	0.27572	0.223239	0.093895		0.0267618	0.026762	0.026762	0.0745156	0.035939	0.0274693	0.0374103		0.092008	0.035533	0.029618	0.0423439	0.049841	0.0357639	0.01737
459	30.6	0.186529	0.169605	0.163175	0.248266	0.144227	0.224596	0.162864	0.290745	0.032385	0.189955	0.327745	0.22828	0.259461	0.061809	0.237747	0.283137	0.201629	0.097893		0.0266508	0.026651	0.026651	0.0769231	0.034962	0.0260437	0.0327497		0.107685	0.035593	0.032243	0.0279918	0.059939	0.0304938	0.0227
460	30.6667	0.180162	0.168514	0.17284	0.245795	0.103822	0.216633	0.154191	0.276657	0.02697	0.193133	0.333503	0.219912	0.2498	0.065408	0.240682	0.3	0.215098	0.10408		0.018181	0.018181	0.018181	0.0728646	0.036308	0.0262886	0.0356866		0.117189	0.033971	0.030866	0.0305755	0.058256	0.0347486	0.017209
461	30.7333	0.190921	0.168273	0.175349	0.247205	0.087136	0.210384	0.150462	0.272297	0.042779	0.19573	0.327751	0.222536	0.259245	0.059246	0.237752	0.297201	0.22096	0.102786		0.0275959	0.027596	0.027596	0.0760319	0.037984	0.0263906	0.0331735		0.104505	0.033442	0.028876	0.0513919	0.054617	0.0329933	0.012898
462	30.8	0.187404	0.168627	0.171364	0.244406	0.077436	0.211881	0.144465	0.277926	0.028324	0.212777	0.336379	0.220568	0.266535	0.048459	0.232948	0.304113	0.201012	0.107333		0.0225012	0.022501	0.022501	0.0657016	0.031894	0.0297312	0.0285355		0.11678	0.036486	0.033145	0.0430073	0.057828	0.0246249	0.020605
463	30.8667	0.169556	0.174029	0.177916	0.247485	0.123176	0.213618	0.143226	0.273492	0.044181	0.220035	0.334477	0.211732	0.266146	0.060083	0.222439	0.30131	0.211669	0.106529		0.0241327	0.024133	0.024133	0.0790274	0.03342	0.0292214	0.0322706		0.083841	0.036725	0.042957	0.0471454	0.067203	0.0256598	0.020365
464	30.9333	0.175456	0.167408	0.173811	0.259426	0.142036	0.222107	0.139581	0.232002	0.032258	0.228524	0.308067	0.223095	0.252151	0.045792	0.218797	0.295341	0.196447	0.095156		0.0229292	0.022929	0.022929	0.0750303	0.032447	0.0271407	0.0273862		0.096334	0.042468	0.031389	0.0650561	0.064113	0.027947	0.019436
465	31	0.171804	0.165488	0.168644	0.244741	0.091037	0.221667	0.130063	0.236916	0.026015	0.248053	0.29891	0.220118	0.269431	0.058298	0.218097	0.303534	0.208128	0.094492		0.0201149	0.020115	0.020115	0.0712756	0.032664	0.0332617	0.0285424		0.095796	0.032414	0.035772	0.0364609	0.053385	0.0243997	0.021252
466	31.0667	0.168768	0.175605	0.174669	0.255018	0.118351	0.223731	0.133417	0.228499	0.032195	0.237843	0.281932	0.22829	0.256636	0.048986	0.212394	0.293323	0.205572	0.092952		0.0291262	0.029126	0.029126	0.0725987	0.034756	0.029362	0.0300416		0.105042	0.043811	0.027972	0.0669129	0.061258	0.0304012	0.019585
467	31.1333	0.155416	0.164174	0.176275	0.255152	0.146583	0.21982	0.148327	0.234948	0.039703	0.232233	0.286008	0.226764	0.268588	0.060571	0.217774	0.269974	0.206164	0.147482		0.0269727	0.026973	0.026973	0.0655419	0.04028	0.0332681	0.0281019		0.10969	0.039886	0.045852	0.0574931	0.059061	0.0353747	0.023673
468	31.2	0.163722	0.168406	0.17347	0.248528	0.097321	0.234648	0.144256	0.222483	0.032755	0.234204	0.305268	0.23061	0.269953	0.050015	0.208387	0.28721	0.214906	0.085459		0.0289551	0.028955	0.028955	0.0587297	0.040731	0.0358814	0.0285683		0.110455	0.044926	0.03044	0.0637688	0.054907	0.0303022	0.020553
469	31.2667	0.15494	0.170897	0.16921	0.258352	0.146328	0.225872	0.14103	0.237107	0.051406	0.21669	0.303661	0.22428	0.262671	0.072518	0.23007	0.296074	0.203289	0.108049		0.0266781	0.026678	0.026678	0.0591716	0.034993	0.02301	0.0318898		0.113636	0.040729	0.040536	0.0669044	0.052661	0.0311637	0.024551
470	31.3333	0.165127	0.179472	0.174831	0.255149	0.124481	0.238504	0.140852	0.239636	0.046286	0.211728	0.308903	0.220398	0.274358	0.056087	0.234248	0.293869	0.202028	0.107705		0.0210831	0.021083	0.021083	0.0640015	0.032497	0.0250951	0.0339921		0.121965	0.044503	0.034425	0.0592973	0.055944	0.0383632	0.016153
471	31.4	0.164333	0.176744	0.167708	0.260718	0.172473	0.232514	0.141761	0.241197	0.048617	0.22951	0.289935	0.22538	0.25499	0.053214	0.223486	0.301841	0.201577	0.115568		0.0228164	0.022816	0.022816	0.0597389	0.034312	0.0251177	0.036857		0.119763	0.046441	0.034255	0.0399963	0.058848	0.025	0.023876
472	31.4667	0.160981	0.195809	0.166961	0.271698	0.165301	0.239899	0.132363	0.232312	0.046273	0.230247	0.298157	0.22608	0.27724	0.047512	0.22217	0.30752	0.1934	0.135496		0.0329635	0.032964	0.032964	0.064172	0.032141	0.0249016	0.0369633		0.105102	0.054482	0.041931	0.0460606	0.066525	0.0287369	0.022459
473	31.5333	0.160468	0.192682	0.163831	0.267608	0.167262	0.215312	0.130465	0.262592	0.044437	0.24521	0.296849	0.223107	0.255932	0.064997	0.196717	0.314834	0.194214	0.101308		0.0265975	0.026598	0.026598	0.0587155	0.032539	0.0234938	0.0367135		0.11629	0.043193	0.040906	0.0651413	0.066262	0.0242673	0.024273
474	31.6	0.153942	0.178699	0.167554	0.279108	0.127044	0.216753	0.135919	0.25945	0.038868	0.239344	0.29517	0.224664	0.262131	0.056781	0.235687	0.319736	0.191502	0.104883		0.023431	0.023431	0.023431	0.0676511	0.033077	0.0206789	0.0428592		0.113065	0.050123	0.033593	0.0577546	0.063358	0.0325077	0.02458
475	31.6667	0.153563	0.181079	0.160449	0.279801	0.157708	0.219957	0.123019	0.277946	0.048013	0.239929	0.286558	0.224711	0.269648	0.053694	0.249948	0.314227	0.193913	0.086037		0.0206945	0.020695	0.020695	0.0595399	0.034404	0.0192753	0.0604998		0.117601	0.049878	0.050988	0.0555347	0.053909	0.0250385	0.025129
476	31.7333	0.159207	0.187515	0.160785	0.282704	0.110848	0.214006	0.126975	0.278642	0.040791	0.231458	0.296913	0.215564	0.270122	0.05724	0.245861	0.316924	0.201404	0.08818		0.0296264	0.029626	0.029626	0.0644163	0.035537	0.0178419	0.0473992		0.108081	0.046267	0.045287	0.060047	0.061599	0.0299386	0.022651
477	31.8	0.168204	0.190601	0.166223	0.281989	0.128661	0.213202	0.120685	0.284513	0.026471	0.206067	0.288896	0.22399	0.279442	0.055609	0.208701	0.318735	0.195283	0.098009		0.0336168	0.033617	0.033617	0.0615907	0.038436	0.0222447	0.0447345		0.104932	0.047583	0.041273	0.0486724	0.084437	0.0290019	0.020844
478	31.8667	0.154585	0.196657	0.165681	0.281621	0.148217	0.199469	0.120395	0.273623	0.032333	0.21975	0.292044	0.12579	0.276562	0.073415	0.20999	0.323862	0.187761	0.110352		0.0290169	0.029017	0.029017	0.0694997	0.037175	0.0226054	0.047888		0.106944	0.05679	0.040296	0.0367232	0.059484	0.0323786	0.023488
479	31.9333	0.156968	0.203634	0.168684	0.278803	0.123521	0.21352	0.130029	0.284297	0.058913	0.222338	0.282343	0.253749	0.287556	0.072968	0.179147	0.324465	0.22275	0.078746		0.0295276	0.029528	0.029528	0.0618162	0.035826	0.0176194	0.0517086		0.085864	0.055693	0.038464	0.046035	0.066442	0.0332922	0.021433
480	32	0.156695	0.197277	0.169682	0.273947	0.130655	0.220303	0.134203	0.293647	0.057641	0.216969	0.269665	0.262692	0.299268	0.071541	0.168557	0.328831	0.229382	0.113723		0.019219	0.019219	0.019219	0.062834	0.030702	0.0213158	0.0485189		0.099027	0.047711	0.044388	0.0539384	0.064137	0.0361485	0.022061
481	32.0667	0.158594	0.1848	0.17431	0.270994	0.115209	0.221805	0.154969	0.297028	0.043025	0.228087	0.268429	0.250691	0.297236	0.069003	0.180629	0.32707	0.215701	0.096905		0.0242002	0.0242	0.0242	0.0643923	0.036796	0.0223576	0.0488014		0.089142	0.050721	0.041197	0.0353038	0.069051	0.0443291	0.027141
482	32.1333	0.164703	0.199841	0.175725	0.270318	0.129186	0.214769	0.150665	0.295275	0.059433	0.223727	0.27916	0.253157	0.299305	0.068283	0.1938	0.336917	0.208896	0.113992		0.0222129	0.022213	0.022213	0.0688054	0.036908	0.0189314	0.0482987		0.089652	0.049187	0.046883	0.0443847	0.062404	0.0426357	0.02506
483	32.2	0.165204	0.19578	0.176903	0.273461	0.125325	0.206531	0.152086	0.2948	0.059768	0.204908	0.26496	0.250852	0.301845	0.065853	0.192609	0.33887	0.204503	0.104231		0.023105	0.023105	0.023105	0.0616395	0.037131	0.0208153	0.0443653		0.083529	0.069242	0.042636	0.0316039	0.065937	0.0446886	0.030618
484	32.2667	0.166763	0.198357	0.170977	0.278373	0.13866	0.215586	0.154034	0.290757	0.058119	0.227757	0.286209	0.24591	0.302431	0.065347	0.189369	0.335028	0.240199	0.097428		0.0241013	0.024101	0.024101	0.0551924	0.034608	0.0230379	0.0456621		0.059457	0.052704	0.060761	0.035865	0.067954	0.043463	0.017792
485	32.3333	0.166204	0.202883	0.187875	0.279894	0.1212	0.222807	0.155147	0.275707	0.042482	0.227402	0.28836	0.241421	0.290576	0.0721	0.181159	0.341128	0.205385	0.124333		0.0259473	0.025947	0.025947	0.054598	0.03874	0.0188537	0.0569736		0.091266	0.076487	0.043007	0.0321375	0.062585	0.0435621	0.02349
486	32.4	0.169527	0.205544	0.190242	0.286632	0.10416	0.218893	0.173675	0.278119	0.047631	0.2274	0.292232	0.246662	0.291116	0.053281	0.186469	0.284727	0.224971	0.129496		0.0295363	0.029536	0.029536	0.0575241	0.034297	0.0201465	0.0469517		0.098897	0.068162	0.057092	0.0303463	0.057656	0.0347432	0.019324
487	32.4667	0.162106	0.20608	0.176399	0.288686	0.123443	0.210487	0.164291	0.278252	0.030508	0.222944	0.290603	0.238005	0.302569	0.072036	0.176585	0.297698	0.232018	0.113192		0.0259046	0.025905	0.025905	0.0610228	0.038284	0.0210526	0.0437049		0.08899	0.070333	0.045056	0.0336251	0.056886	0.0335564	0.0229
488	32.5333	0.158572	0.207803	0.182935	0.294456	0.142021	0.212167	0.180212	0.275022	0.041067	0.21461	0.279295	0.236447	0.298519	0.079851	0.161971	0.261316	0.229916	0.117367		0.0304745	0.030475	0.030475	0.0573554	0.038348	0.0214986	0.0452282		0.079233	0.072304	0.056758	0.04465	0.061209	0.0330283	0.019946
489	32.6	0.159911	0.2128	0.178475	0.299199	0.112954	0.214829	0.173072	0.277061	0.055785	0.211567	0.275855	0.232605	0.281526	0.053302	0.162253	0.227094	0.244006	0.111371		0.025175	0.025175	0.025175	0.0617929	0.032457	0.0202799	0.0562842		0.087372	0.076555	0.057611	0.041591	0.05241	0.0317121	0.018526
490	32.6667	0.162026	0.213809	0.185064	0.310361	0.129224	0.211939	0.171751	0.284854	0.050673	0.217956	0.273831	0.219574	0.295812	0.091572	0.195575	0.208225	0.232216	0.129264		0.0273021	0.027302	0.027302	0.0680758	0.035248	0.0207724	0.0481197		0.099548	0.098469	0.05987	0.0301779	0.056681	0.030303	0.017844
491	32.7333	0.156933	0.210085	0.173443	0.305598	0.129201	0.216402	0.189855	0.274985	0.050326	0.216736	0.271943	0.212399	0.297451	0.083798	0.153435	0.224144	0.240325	0.131959		0.0228595	0.02286	0.02286	0.0615142	0.032419	0.0217928	0.0373334		0.095011	0.073462	0.049167	0.0235594	0.063638	0.0289695	0.023931
492	32.8	0.160338	0.213101	0.176854	0.286092	0.117034	0.211384	0.190548	0.277673	0.054468	0.219703	0.255428	0.218327	0.284191	0.068387	0.13847	0.256453	0.224011	0.124331		0.0307609	0.030761	0.030761	0.0634906	0.032805	0.0244821	0.0388724		0.095764	0.0565	0.062063	0.0474453	0.05885	0.0285088	0.023068
493	32.8667	0.15938	0.216243	0.178275	0.272677	0.1451	0.207926	0.182919	0.260517	0.078003	0.210525	0.255663	0.211164	0.266067	0.066588	0.14781	0.307343	0.226951	0.132883		0.0198117	0.019812	0.019812	0.0634283	0.032183	0.0230783	0.0503597		0.067339	0.07117	0.043093	0.0452165	0.053545	0.0246565	0.019917
494	32.9333	0.152179	0.212238	0.175079	0.284803	0.152302	0.203183	0.178539	0.272433	0.072233	0.198712	0.247617	0.193026	0.275106	0.064232	0.169791	0.223496	0.222403	0.137877		0.0285608	0.028561	0.028561	0.0561097	0.031646	0.0237254	0.0472536		0.087635	0.061782	0.053653	0.0358675	0.05229	0.0316541	0.018169
495	33	0.160846	0.205605	0.163669	0.294936	0.1382	0.207215	0.180856	0.28467	0.060819	0.209169	0.239621	0.199075	0.286694	0.054847	0.189997	0.261866	0.231433	0.134215		0.0373984	0.037398	0.037398	0.0522083	0.035798	0.0197255	0.0535819		0.073028	0.062692	0.048407	0.0556198	0.063781	0.0274513	0.020672
496	33.0667	0.162858	0.203768	0.152296	0.310721	0.150165	0.207999	0.180827	0.289557	0.076545	0.201043	0.232638	0.192463	0.286533	0.058729	0.209208	0.333952	0.213841	0.119147		0.0289206	0.028921	0.028921	0.0533494	0.031233	0.025641	0.0480907		0.085049	0.066812	0.028538	0.0348019	0.060251	0.0329535	0.017772
497	33.1333	0.162645	0.205703	0.151204	0.296267	0.068899	0.20931	0.178217	0.284428	0.086894	0.192682	0.235026	0.182748	0.273726	0.074997	0.21139	0.332158	0.212812	0.096352		0.030196	0.030196	0.030196	0.0512614	0.027624	0.0239753	0.0475488		0.080231	0.052224	0.050899	0.0457586	0.063395	0.0345552	0.021598
498	33.2	0.164061	0.209021	0.149173	0.300252	0.121337	0.206259	0.163406	0.283644	0.105496	0.19533	0.217367	0.197412	0.304611	0.070438	0.228856	0.331321	0.201571	0.077869		0.030616	0.030616	0.030616	0.0559772	0.027935	0.0224285	0.0547945		0.077785	0.048624	0.072194	0.0528856	0.055683	0.0321992	0.022817
499	33.2667	0.163752	0.219871	0.1541	0.306357	0.16495	0.206278	0.169331	0.275171	0.078513	0.198035	0.228158	0.18516	0.300831	0.073258	0.256597	0.318961	0.199139	0.123997		0.0300203	0.03002	0.03002	0.0553661	0.035169	0.0268775	0.0518987		0.089455	0.045427	0.03752	0.0283456	0.058241	0.0317164	0.017355
500	33.3333	0.160839	0.220337	0.145838	0.288247	0.152456	0.205906	0.168381	0.289364	0.117858	0.18776	0.244339	0.201555	0.32659	0.078689	0.26004	0.3125	0.201115	0.108129		0.0320998	0.0321	0.0321	0.0475292	0.034551	0.0265144	0.0573509		0.101304	0.048732	0.031598	0.0325232	0.057677	0.031758	0.021277
501	33.4	0.165567	0.228181	0.148951	0.302992	0.14009	0.199062	0.159796	0.291883	0.088537	0.186276	0.234543	0.200774	0.306349	0.071584	0.25869	0.305001	0.195082	0.077658		0.0245998	0.0246	0.0246	0.0464383	0.036482	0.0235493	0.0440599		0.079518	0.045879	0.065671	0.0425235	0.059869	0.0305241	0.02626
502	33.4667	0.175761	0.226777	0.139638	0.303488	0.113339	0.208663	0.153452	0.294453	0.088725	0.188417	0.245528	0.196703	0.29649	0.079255	0.263964	0.272415	0.193651	0.087489		0.0294985	0.029499	0.029499	0.0488706	0.013857	0.024325	0.048965		0.096194	0.036952	0.050469	0.0599473	0.058452	0.0336572	0.020665
503	33.5333	0.171056	0.239191	0.152726	0.298149	0.142463	0.200143	0.161335	0.303895	0.093964	0.189058	0.232557	0.191687	0.301838	0.066391	0.246947	0.298056	0.204166	0.088649		0.0286637	0.028664	0.028664	0.0488624	0.015449	0.0215456	0.0461845		0.070588	0.040633	0.04768	0.0524162	0.051867	0.0317968	0.020529
504	33.6	0.167943	0.231356	0.148449	0.289727	0.158833	0.198398	0.16168	0.295969	0.086699	0.189799	0.219771	0.196052	0.311157	0.038265	0.238689	0.309813	0.20347	0.082708		0.029975	0.029975	0.029975	0.0486127	0.022737	0.0270682	0.046988		0.10513	0.041982	0.031496	0.0336316	0.039984	0.0315434	0.019473
505	33.6667	0.172736	0.231757	0.176439	0.306898	0.118605	0.202905	0.168342	0.283204	0.120603	0.18446	0.227292	0.199041	0.30631	0.04627	0.229746	0.29147	0.2111	0.067292		0.0249156	0.024916	0.024916	0.0459681	0.061504	0.0239105	0.0421324		0.083016	0.051098	0.037633	0.0397041	0.039454	0.0336907	0.025306
506	33.7333	0.171203	0.244767	0.172031	0.310482	0.1351	0.183327	0.171	0.286241	0.1	0.189101	0.222567	0.198391	0.3029	0.070326	0.239953	0.271031	0.207678	0.080986		0.0306265	0.030627	0.030627	0.0469039	0.072993	0.0262732	0.044541		0.080169	0.039312	0.023213	0.0424256	0.042549	0.040116	0.020158
507	33.8	0.172582	0.241253	0.175666	0.310275	0.142018	0.192748	0.16705	0.273126	0.085342	0.190385	0.215496	0.196218	0.31714	0.065354	0.25047	0.296408	0.204669	0.075978		0.0274923	0.027492	0.027492	0.0454545	0.066201	0.0264878	0.0451331		0.099011	0.044647	0.030949	0.030667	0.039719	0.0410392	0.022505
508	33.8667	0.178297	0.236139	0.181358	0.293555	0.129226	0.199035	0.170497	0.273049	0.116328	0.188607	0.215902	0.207358	0.30759	0.048043	0.222233	0.303165	0.233078	0.111069		0.0254964	0.025496	0.025496	0.0472233	0.069026	0.0283983	0.0373035		0.077554	0.042164	0.030321	0.0353195	0.04296	0.0464684	0.025222
509	33.9333	0.174876	0.23797	0.18122	0.301537	0.116938	0.184087	0.070489	0.246675	0.083203	0.210168	0.215152	0.199839	0.312995	0.072385	0.221483	0.305429	0.22444	0.092624		0.0294978	0.029498	0.029498	0.0484448	0.081014	0.0293846	0.0336437		0.08458	0.036645	0.041714	0.034632	0.033999	0.03517	0.016684
510	34	0.160778	0.245169	0.179423	0.291203	0.107359	0.201144	0.151023	0.250204	0.095546	0.212031	0.228051	0.197259	0.296845	0.056197	0.223818	0.304312	0.226601	0.055486		0.0272901	0.02729	0.02729	0.0543432	0.062958	0.0292793	0.0384475		0.103407	0.038238	0.048342	0.0341693	0.046363	0.0462591	0.01701
511	34.0667	0.162	0.235391	0.181934	0.298561	0.110209	0.192612	0.193751	0.245681	0.064687	0.217985	0.23574	0.199889	0.303206	0.057829	0.224682	0.315409	0.209333	0.04696		0.0334237	0.033424	0.033424	0.0455326	0.030968	0.032153	0.0504377		0.097076	0.039535	0.035658	0.0349792	0.04441	0.0452	0.023513
512	34.1333	0.166863	0.235604	0.186555	0.287065	0.117111	0.188714	0.195454	0.233894	0.083	0.224903	0.237928	0.206068	0.277898	0.076781	0.225406	0.323056	0.205338	0.062382		0.0265459	0.026546	0.026546	0.0506876	0.032695	0.0355068	0.0423326		0.088929	0.036072	0.036482	0.0518533	0.040047	0.0412424	0.016058
513	34.2	0.176938	0.220422	0.176629	0.307366	0.144705	0.177787	0.196359	0.208533	0.099791	0.222084	0.24466	0.201087	0.279326	0.0604	0.219876	0.211755	0.216446	0.059848		0.0307832	0.030783	0.030783	0.0529453	0.045846	0.0361679	0.0298793		0.095149	0.044919	0.042548	0.0380577	0.04294	0.0418271	0.014623
514	34.2667	0.176471	0.225569	0.17757	0.305016	0.103179	0.162821	0.199899	0.205472	0.117309	0.211006	0.243453	0.196932	0.282472	0.063925	0.209951	0.103976	0.206319	0.062618		0.0263483	0.026348	0.026348	0.0512153	0.040282	0.0358268	0.0323485		0.119714	0.039059	0.037153	0.0394241	0.040796	0.0334335	0.017484
515	34.3333	0.176978	0.22753	0.180095	0.307924	0.122392	0.136574	0.191256	0.20697	0.12417	0.223585	0.250918	0.201218	0.272265	0.050797	0.205448	0.261021	0.210342	0.080843		0.0260182	0.026018	0.026018	0.0700662	0.054186	0.0335675	0.0358437		0.081232	0.041281	0.043031	0.0482885	0.033072	0.0372071	0.01751
516	34.4	0.17168	0.227593	0.174803	0.295602	0.133051	0.209432	0.19227	0.21932	0.113673	0.227378	0.25898	0.207169	0.282388	0.049986	0.20896	0.251683	0.221548	0.079334		0.036927	0.036927	0.036927	0.0533765	0.044324	0.0376428	0.0351918		0.089635	0.045022	0.052505	0.0534655	0.035019	0.03482	0.014233
517	34.4667	0.169201	0.217695	0.187942	0.325678	0.16723	0.174315	0.196339	0.217073	0.1248	0.22646	0.269497	0.211862	0.265049	0.064476	0.195626	0.247695	0.244081	0.088442		0.0314575	0.031458	0.031458	0.0609976	0.051126	0.0381679	0.0318396		0.101394	0.040855	0.04063	0.0339008	0.024354	0.0324924	0.016211
518	34.5333	0.173181	0.228671	0.18839	0.328519	0.140716	0.247051	0.192309	0.227354	0.124296	0.22397	0.266766	0.219216	0.274345	0.053985	0.203739	0.24465	0.228943	0.090203		0.0280513	0.028051	0.028051	0.0620424	0.080166	0.04662	0.0349094		0.1141	0.050623	0.034849	0.058657	0.036341	0.0330515	0.026873
519	34.6	0.1708	0.219657	0.184463	0.330439	0.175197	0.267459	0.18379	0.235047	0.134862	0.228672	0.263949	0.21711	0.282294	0.041555	0.256893	0.245946	0.213942	0.071252		0.029138	0.029138	0.029138	0.0781583	0.069646	0.0472821	0.0351918		0.094492	0.042025	0.030326	0.0547108	0.035074	0.0317325	0.016508
520	34.6667	0.170292	0.219932	0.188126	0.299511	0.117969	0.264596	0.17706	0.248683	0.121297	0.207856	0.271203	0.21579	0.274292	0.049643	0.253421	0.252108	0.200943	0.094057		0.0275638	0.027564	0.027564	0.0736804	0.06894	0.0459108	0.0379185		0.077908	0.039906	0.045652	0.0468227	0.037954	0.0320068	0.018291
521	34.7333	0.167674	0.217755	0.190437	0.302263	0.138551	0.25949	0.178184	0.238601	0.085253	0.190841	0.288232	0.216388	0.274414	0.053216	0.258262	0.249779	0.209662	0.074442		0.0246541	0.024654	0.024654	0.0714286	0.076573	0.0441832	0.0342679		0.077022	0.048338	0.065336	0.0533204	0.03916	0.0296412	0.021009
522	34.8	0.171654	0.211942	0.197478	0.302007	0.112668	0.251423	0.177701	0.238875	0.088011	0.193439	0.281284	0.23308	0.272981	0.053675	0.268395	0.251574	0.188722	0.075243		0.0340187	0.034019	0.034019	0.062368	0.074721	0.0420701	0.0311198		0.095579	0.038482	0.036514	0.055946	0.047899	0.0315749	0.02102
523	34.8667	0.167854	0.214211	0.199522	0.278932	0.180763	0.254838	0.172509	0.254678	0.120434	0.207655	0.281406	0.22386	0.286918	0.052831	0.27303	0.254069	0.195227	0.105046		0.0299875	0.029988	0.029988	0.0670498	0.082418	0.0382979	0.0346868		0.08548	0.041266	0.033651	0.0392171	0.046328	0.0348361	0.01949
524	34.9333	0.166306	0.218798	0.199834	0.291882	0.146667	0.252218	0.166098	0.250194	0.157799	0.1945	0.298494	0.218961	0.288812	0.041603	0.27583	0.257031	0.197822	0.103086		0.0244081	0.024408	0.024408	0.0729053	0.082508	0.0315631	0.0275476		0.068602	0.052011	0.066149	0.03411	0.044626	0.0346041	0.020366
525	35	0.162256	0.22164	0.193489	0.293708	0.120615	0.242835	0.187672	0.260357	0.118968	0.193512	0.282895	0.228005	0.292278	0.042503	0.256431	0.248705	0.202226	0.07131		0.0261603	0.02616	0.02616	0.0636833	0.053942	0.025641	0.0283242		0.08122	0.041993	0.062733	0.0350743	0.051759	0.0367501	0.01861
526	35.0667	0.164634	0.216838	0.195941	0.294168	0.146122	0.233	0.191241	0.263892	0.119048	0.19582	0.264266	0.236727	0.292328	0.056176	0.263038	0.250478	0.189421	0.073975		0.0245538	0.024554	0.024554	0.0700358	0.051396	0.0224656	0.0297298		0.067501	0.035386	0.060454	0.0324376	0.041396	0.036504	0.028455
527	35.1333	0.172531	0.213994	0.205824	0.299551	0.121809	0.235854	0.176756	0.266049	0.104333	0.204138	0.262813	0.24022	0.293691	0.038257	0.273273	0.240423	0.192471	0.101208		0.0228234	0.022823	0.022823	0.066359	0.068805	0.0206181	0.0377455		0.080371	0.042729	0.038921	0.0364251	0.047495	0.0307039	0.024786
528	35.2	0.168346	0.214876	0.208237	0.294816	0.152123	0.219174	0.184151	0.277415	0.156244	0.195261	0.26618	0.246328	0.297477	0.057904	0.245828	0.23965	0.204149	0.094801		0.0257292	0.025729	0.025729	0.0736268	0.082303	0.02158	0.0368		0.074171	0.054922	0.023692	0.0387122	0.03813	0.0367232	0.030155
529	35.2667	0.158929	0.207951	0.206632	0.299141	0.151472	0.234958	0.172733	0.277114	0.116875	0.205463	0.264966	0.255709	0.279046	0.073795	0.233267	0.248768	0.188563	0.090026		0.0295065	0.029507	0.029507	0.062878	0.070332	0.0218978	0.0383762		0.085241	0.053676	0.03316	0.0342209	0.042396	0.0320187	0.021954
530	35.3333	0.166451	0.212436	0.209484	0.306262	0.122842	0.217181	0.167197	0.273701	0.143934	0.169991	0.273593	0.262857	0.263682	0.068632	0.237231	0.251925	0.1841	0.069267		0.0293146	0.029315	0.029315	0.0614462	0.060435	0.0235158	0.0315275		0.099954	0.042366	0.043513	0.0460417	0.068808	0.0279971	0.026861
531	35.4	0.172934	0.21318	0.195396	0.242765	0.158203	0.234375	0.155698	0.279092	0.122241	0.189924	0.264415	0.256793	0.289464	0.054023	0.207728	0.251027	0.186516	0.077161		0.0273742	0.027374	0.027374	0.0535722	0.064406	0.0255831	0.0323625		0.084701	0.047928	0.024272	0.0375994	0.052097	0.0280855	0.022853
532	35.4667	0.174112	0.212623	0.194234	0.255838	0.132437	0.223537	0.143586	0.281118	0.115866	0.204298	0.270784	0.259451	0.253913	0.056497	0.225814	0.247745	0.179301	0.071266		0.0320651	0.032065	0.032065	0.0956754	0.05506	0.0203611	0.0288744		0.081404	0.04475	0.039673	0.024769	0.064088	0.0287009	0.020838
533	35.5333	0.173525	0.220938	0.198251	0.254788	0.165674	0.245247	0.136574	0.26718	0.114274	0.208977	0.252142	0.268274	0.283398	0.076046	0.225249	0.250997	0.200695	0.083404		0.0299393	0.029939	0.029939	0.0859012	0.079537	0.0227711	0.0473637		0.080985	0.041221	0.027952	0.0359376	0.062847	0.0335097	0.026036
534	35.6	0.16936	0.220848	0.201876	0.240698	0.140676	0.238022	0.139437	0.27155	0.114575	0.226428	0.26175	0.26448	0.299631	0.055383	0.240539	0.253764	0.189396	0.069007		0.0283197	0.02832	0.02832	0.0749315	0.065131	0.0214974	0.038625		0.087031	0.060571	0.028352	0.0273399	0.06524	0.032509	0.026656
535	35.6667	0.173906	0.225094	0.190603	0.254565	0.171445	0.223896	0.14178	0.265482	0.135184	0.222911	0.259147	0.257789	0.302773	0.064214	0.235911	0.259037	0.194295	0.070479		0.030426	0.030426	0.030426	0.0650161	0.065391	0.0213252	0.0452095		0.078943	0.057924	0.05398	0.0344125	0.057978	0.0366692	0.024962
536	35.7333	0.175051	0.215193	0.198879	0.24445	0.121162	0.266246	0.147238	0.24019	0.116814	0.227235	0.259768	0.263859	0.293066	0.052997	0.229643	0.252528	0.196187	0.056038		0.031676	0.031676	0.031676	0.0682269	0.067354	0.0246533	0.0485956		0.07864	0.050924	0.045287	0.035568	0.064152	0.0372896	0.029303
537	35.8	0.178262	0.208358	0.165077	0.24272	0.125845	0.242562	0.174466	0.275168	0.12092	0.225752	0.241289	0.261409	0.283585	0.060823	0.215939	0.262955	0.19161	0.072415		0.0323898	0.03239	0.03239	0.0669472	0.055911	0.0222222	0.0425044		0.072414	0.03912	0.012318	0.0308734	0.068967	0.0417159	0.022962
538	35.8667	0.173329	0.208554	0.170716	0.238625	0.106421	0.238132	0.173801	0.275591	0.114251	0.221704	0.245105	0.256939	0.299552	0.058723	0.21923	0.258278	0.164761	0.084671		0.0283814	0.028381	0.028381	0.0783394	0.070242	0.0242533	0.0455373		0.063183	0.050501	0.014689	0.018577	0.065298	0.0424951	0.022016
539	35.9333	0.176475	0.21905	0.211208	0.231544	0.132316	0.222538	0.180389	0.288809	0.124298	0.201957	0.249058	0.251088	0.279519	0.071478	0.219851	0.264113	0.1933	0.071457		0.0309623	0.030962	0.030962	0.064627	0.071979	0.0239726	0.0431849		0.067066	0.044992	0.012767	0.0418472	0.062896	0.0498203	0.024885
540	36	0.17253	0.224272	0.204233	0.225587	0.101513	0.207394	0.186318	0.288176	0.125	0.197737	0.242357	0.255144	0.259781	0.041439	0.238135	0.265294	0.215397	0.066223		0.0399544	0.039954	0.039954	0.0738423	0.074499	0.0241058	0.0512165		0.069731	0.039233	0.015088	0.0346512	0.05956	0.0462451	0.019259
541	36.0667	0.176447	0.221765	0.19653	0.211943	0.139308	0.21424	0.170483	0.294486	0.119554	0.194472	0.240247	0.250271	0.267776	0.057868	0.184873	0.264928	0.221114	0.075852		0.0323498	0.03235	0.03235	0.0706434	0.085374	0.0228659	0.0515737		0.066825	0.042536	0.011905	0.03767	0.056843	0.043258	0.023779
542	36.1333	0.170354	0.221169	0.193594	0.232507	0.167586	0.210396	0.180685	0.288329	0.127562	0.197465	0.242143	0.239064	0.245649	0.060801	0.177916	0.268992	0.234518	0.087796		0.0357474	0.035747	0.035747	0.0677794	0.07067	0.020632	0.0547153		0.091806	0.03617	0.026588	0.0392749	0.060687	0.0388276	0.021029
543	36.2	0.176691	0.201023	0.198104	0.241422	0.116641	0.246242	0.191094	0.292147	0.140206	0.195673	0.232759	0.226912	0.26597	0.071429	0.191901	0.277526	0.23198	0.086745		0.0310816	0.031082	0.031082	0.0679348	0.068783	0.0242505	0.0631126		0.08077	0.044848	0.011081	0.0677394	0.06497	0.0388388	0.018241
544	36.2667	0.174604	0.273292	0.197917	0.264504	0.141477	0.212287	0.192562	0.293513	0.11018	0.194589	0.23356	0.219662	0.232964	0.054203	0.17127	0.272083	0.245344	0.05625		0.0302541	0.030254	0.030254	0.0675195	0.074563	0.0260571	0.044236		0.089417	0.047694	0.009709	0.0492928	0.063548	0.0415851	0.021862
545	36.3333	0.171419	0.181885	0.198073	0.265555	0.071162	0.260268	0.200276	0.291609	0.146905	0.191573	0.224612	0.209615	0.271805	0.042121	0.173755	0.276995	0.249691	0.071795		0.0327939	0.032794	0.032794	0.0718336	0.08849	0.020648	0.0661634		0.085859	0.056812	0.030444	0.0590412	0.059077	0.0397816	0.022793
546	36.4	0.165677	0.191785	0.199435	0.163569	0.131981	0.258353	0.184928	0.297201	0.095296	0.196026	0.219188	0.210253	0.263515	0.057185	0.210406	0.279606	0.235644	0.07132		0.032883	0.032883	0.032883	0.0629614	0.054338	0.0241967	0.0281804		0.081724	0.059019	0.023481	0.0415006	0.06501	0.0288283	0.020897
547	36.4667	0.177159	0.200681	0.204011	0.261965	0.102226	0.223325	0.190406	0.278848	0.206053	0.191097	0.229971	0.215897	0.26035	0.059381	0.187564	0.274058	0.242226	0.063874		0.0320126	0.032013	0.032013	0.0807281	0.07456	0.0258887	0.022391		0.095518	0.064442	0.025738	0.0431041	0.068702	0.0356111	0.020621
548	36.5333	0.172862	0.210074	0.202485	0.252465	0.100663	0.233421	0.180921	0.298419	0.160632	0.18728	0.230276	0.211282	0.254802	0.063779	0.185079	0.278086	0.249561	0.071425		0.0371297	0.03713	0.03713	0.0711279	0.035826	0.025743	0.0210164		0.0513	0.072368	0.014062	0.0288149	0.056416	0.0253012	0.028108
549	36.6	0.172862	0.213501	0.199803	0.259175	0.154938	0.219251	0.181421	0.291354	0.173797	0.190855	0.227434	0.216318	0.264349	0.063159	0.218513	0.288663	0.241965	0.055906		0.0435187	0.043519	0.043519	0.0709941	0.032844	0.0263862	0.0276493		0.086232	0.073761	0.014528	0.0282262	0.056189	0.0262106	0.021665
550	36.6667	0.175293	0.221452	0.201684	0.258225	0.153005	0.233464	0.187917	0.281606	0.195363	0.186828	0.240832	0.217416	0.26619	0.05997	0.241043	0.293826	0.224255	0.069062		0.0261438	0.026144	0.026144	0.0783907	0.0514	0.0239361	0.0166011		0.099448	0.078236	0.013324	0.0236638	0.05489	0.0272374	0.021148
551	36.7333	0.178115	0.21638	0.205231	0.252202	0.149959	0.253659	0.189652	0.293247	0.102709	0.190418	0.214821	0.203826	0.261499	0.050679	0.252607	0.294911	0.231169	0.069787		0.0334395	0.03344	0.03344	0.0645041	0.047268	0.025641	0.0159236		0.068659	0.077551	0.015861	0.0458086	0.061655	0.0211409	0.019699
552	36.8	0.176839	0.218276	0.208323	0.251712	0.142198	0.260532	0.190458	0.296344	0.107061	0.191077	0.210766	0.183889	0.261727	0.054914	0.264834	0.28689	0.238791	0.081553		0.0332062	0.033206	0.033206	0.074633	0.0527	0.0251062	0.0222438		0.111074	0.086708	0.022607	0.042093	0.052337	0.0289157	0.025678
553	36.8667	0.182188	0.225376	0.210624	0.240509	0.121739	0.245105	0.188962	0.29387	0.130196	0.181331	0.205562	0.18169	0.256052	0.054845	0.269807	0.301423	0.242998	0.062965		0.032396	0.032396	0.032396	0.0742358	0.058612	0.0289624	0.0190476		0.118555	0.103006	0.024092	0.0372223	0.053183	0.0298565	0.016752
554	36.9333	0.177866	0.226047	0.200324	0.250283	0.093633	0.23095	0.18665	0.286518	0.11437	0.176653	0.205911	0.189822	0.246142	0.041838	0.299367	0.291798	0.246465	0.072675		0.0352144	0.035214	0.035214	0.0715371	0.054651	0.0271049	0.0180288		0.119972	0.113278	0.022462	0.045405	0.047974	0.0310881	0.020297
555	37	0.168772	0.234687	0.202801	0.246933	0.117997	0.229003	0.187042	0.295807	0.140602	0.16602	0.210782	0.191731	0.212443	0.065986	0.276095	0.298858	0.23755	0.073524		0.0314562	0.031456	0.031456	0.0722762	0.034564	0.0296973	0.018135		0.092385	0.113848	0.019021	0.04209	0.043444	0.0305954	0.02329
556	37.0667	0.175206	0.220525	0.182329	0.252743	0.133249	0.244929	0.179609	0.304376	0.127548	0.169106	0.208909	0.197587	0.233673	0.065529	0.277226	0.29422	0.265285	0.073512		0.0299199	0.02992	0.02992	0.0641497	0.055661	0.0269886	0.0216944		0.109997	0.105902	0.022534	0.0487286	0.042033	0.0363565	0.020886
557	37.1333	0.181792	0.224547	0.170584	0.242201	0.109952	0.25635	0.181818	0.300113	0.130205	0.179357	0.223859	0.203108	0.231527	0.082485	0.273766	0.297652	0.254497	0.06535		0.0288531	0.028853	0.028853	0.075778	0.082748	0.0235942	0.0195745		0.099626	0.101277	0.013983	0.0607345	0.040926	0.034581	0.023873
558	37.2	0.173491	0.218841	0.17934	0.235281	0.143953	0.260257	0.18946	0.290906	0.133738	0.195186	0.21	0.195295	0.237249	0.060217	0.263422	0.301333	0.252318	0.066637		0.0280948	0.028095	0.028095	0.0740395	0.075387	0.0290853	0.0188075		0.107536	0.103765	0.017175	0.0304147	0.058468	0.0319013	0.022467
559	37.2667	0.179677	0.212032	0.190683	0.239053	0.113846	0.260868	0.187838	0.293124	0.128145	0.19653	0.208791	0.191067	0.230557	0.058584	0.287308	0.305491	0.241858	0.068907		0.0398458	0.039846	0.039846	0.062062	0.063281	0.0267052	0.0234731		0.092137	0.066062	0.01484	0.0504302	0.042406	0.038715	0.025263
560	37.3333	0.179474	0.214792	0.201669	0.234845	0.09638	0.263707	0.189073	0.297718	0.127523	0.206847	0.208464	0.189689	0.265411	0.059162	0.273096	0.307234	0.256652	0.068797		0.0350939	0.035094	0.035094	0.0740875	0.076375	0.0321083	0.0263873		0.072562	0.065559	0.00783	0.0536621	0.036666	0.0404875	0.02242
561	37.4	0.175499	0.224011	0.18683	0.222647	0.099166	0.25406	0.18789	0.295179	0.133014	0.207204	0.20413	0.190235	0.243764	0.05556	0.260051	0.300146	0.237211	0.070667		0.03286	0.03286	0.03286	0.0646752	0.095501	0.028065	0.0205353		0.10423	0.048617	0.017857	0.0561282	0.048751	0.0294326	0.022073
562	37.4667	0.183162	0.21699	0.186348	0.224184	0.120706	0.252878	0.191981	0.298116	0.113024	0.210906	0.196296	0.181592	0.270957	0.064213	0.24069	0.296162	0.246539	0.076253		0.0373829	0.037383	0.037383	0.0623696	0.0516	0.0273556	0.0192459		0.097794	0.045286	0.015226	0.0498261	0.044436	0.0357417	0.019844
563	37.5333	0.181075	0.222991	0.18337	0.228377	0.135166	0.244545	0.186954	0.287469	0.120353	0.212106	0.213849	0.186979	0.237451	0.05685	0.272352	0.295815	0.237758	0.089089		0.0271059	0.027106	0.027106	0.0573099	0.063991	0.0287927	0.0224727		0.09033	0.049115	0.012908	0.0581542	0.052938	0.0303429	0.020015
564	37.6	0.18176	0.231581	0.174251	0.236716	0.098847	0.235349	0.184055	0.278628	0.121191	0.209416	0.210791	0.191874	0.248359	0.057023	0.228034	0.29467	0.254755	0.081382		0.0398277	0.039828	0.039828	0.0553903	0.053264	0.0283495	0.0220441		0.099315	0.04712	0.016683	0.0462663	0.064549	0.0336727	0.024187
565	37.6667	0.181359	0.227539	0.180654	0.236256	0.103365	0.241845	0.187625	0.277097	0.116426	0.215049	0.216681	0.194084	0.255925	0.084567	0.242915	0.304576	0.243145	0.0767		0.0215097	0.02151	0.02151	0.0663311	0.064061	0.0273818	0.0255102		0.083673	0.041092	0.013987	0.0467254	0.057231	0.0357427	0.020456
566	37.7333	0.171416	0.226933	0.177288	0.249375	0.121061	0.247506	0.192336	0.254827	0.130358	0.209976	0.213645	0.1903	0.262538	0.066709	0.241199	0.289954	0.236436	0.070675		0.0262839	0.026284	0.026284	0.0691174	0.049	0.0283374	0.0247966		0.077688	0.047502	0.019732	0.033838	0.059226	0.0405515	0.023162
567	37.8	0.175911	0.210737	0.184522	0.250063	0.105614	0.233757	0.195594	0.284216	0.111002	0.193236	0.207673	0.18667	0.258045	0.072146	0.237164	0.267296	0.263734	0.069152		0.0224784	0.022478	0.022478	0.0571814	0.054139	0.0259023	0.0221371		0.075043	0.043552	0.02667	0.0433072	0.057598	0.0507961	0.020079
568	37.8667	0.176681	0.222632	0.18457	0.260796	0.092298	0.247448	0.189463	0.247235	0.114912	0.203448	0.204891	0.188821	0.2687	0.062276	0.213513	0.271646	0.277385	0.061375		0.0324544	0.032454	0.032454	0.0578541	0.064576	0.0263003	0.025243		0.105228	0.051172	0.017446	0.0354119	0.056475	0.0607574	0.019334
569	37.9333	0.164091	0.216486	0.191651	0.247438	0.104149	0.249686	0.177425	0.265246	0.138142	0.177401	0.216906	0.180762	0.248825	0.071083	0.239547	0.276971	0.268653	0.068465		0.0342099	0.03421	0.03421	0.0587772	0.055267	0.0277089	0.0246035		0.082721	0.031471	0.020864	0.0295532	0.066717	0.0534717	0.021303
570	38	0.170957	0.228758	0.182563	0.245993	0.135258	0.248011	0.183394	0.242805	0.150256	0.185307	0.22406	0.190337	0.253747	0.097528	0.229397	0.280547	0.286274	0.072403		0.0276303	0.02763	0.02763	0.0496043	0.054626	0.0220588	0.0275482		0.100252	0.049372	0.019299	0.036488	0.056294	0.061479	0.020438
571	38.0667	0.168447	0.222155	0.19481	0.235789	0.119839	0.250231	0.172696	0.261941	0.138135	0.184823	0.217786	0.186428	0.256405	0.083112	0.243679	0.28109	0.269124	0.087175		0.0286946	0.028695	0.028695	0.050734	0.053524	0.0260766	0.0300413		0.091922	0.041584	0.020952	0.0251665	0.059524	0.0508581	0.019778
572	38.1333	0.170913	0.224013	0.197731	0.219083	0.113247	0.239698	0.171784	0.24705	0.098602	0.181867	0.232054	0.185547	0.269231	0.070276	0.240469	0.289449	0.26978	0.042077		0.0322204	0.03222	0.03222	0.050914	0.054849	0.0228274	0.0251333		0.071754	0.03419	0.019743	0.0541038	0.063647	0.0398193	0.021982
573	38.2	0.173607	0.231255	0.199475	0.230314	0.124361	0.232998	0.168747	0.260618	0.132243	0.181732	0.245325	0.183215	0.250826	0.094158	0.237285	0.302226	0.278441	0.055718		0.0327927	0.032793	0.032793	0.0538693	0.058768	0.0292284	0.025442		0.070575	0.035616	0.018893	0.0404903	0.069011	0.0423032	0.024479
574	38.2667	0.166587	0.232023	0.19406	0.21928	0.118575	0.223644	0.147289	0.258207	0.124249	0.169542	0.246114	0.186743	0.226542	0.08119	0.223538	0.304327	0.279792	0.08222		0.0261775	0.026178	0.026178	0.0521076	0.070876	0.0289085	0.0266562		0.086895	0.041618	0.019061	0.0596977	0.061564	0.0349194	0.017675
575	38.3333	0.168951	0.22734	0.200472	0.213831	0.09364	0.224795	0.144785	0.261759	0.119865	0.181368	0.254776	0.184012	0.240913	0.081135	0.238009	0.310022	0.287991	0.083931		0.0274991	0.027499	0.027499	0.0614141	0.068527	0.0250685	0.026176		0.079872	0.041619	0.008572	0.0272502	0.064042	0.0298445	0.016003
576	38.4	0.162865	0.230356	0.201301	0.216233	0.150895	0.213377	0.157223	0.260489	0.151871	0.181587	0.253858	0.175347	0.254958	0.091486	0.222626	0.305603	0.289976	0.060675		0.0264527	0.026453	0.026453	0.0533512	0.065655	0.0282105	0.0242588		0.093463	0.043143	0.008589	0.0407643	0.076561	0.0266972	0.030511
577	38.4667	0.163303	0.223579	0.190964	0.196186	0.180983	0.219314	0.144237	0.292865	0.15764	0.178955	0.220802	0.178041	0.25049	0.084313	0.219806	0.308716	0.283322	0.057637		0.0327238	0.032724	0.032724	0.0521839	0.053459	0.0280622	0.0218042		0.082756	0.043605	0.013148	0.0382343	0.071398	0.0249487	0.023034
578	38.5333	0.158318	0.224942	0.1948	0.220512	0.140463	0.212569	0.140257	0.281174	0.146832	0.173852	0.239677	0.178285	0.267683	0.07645	0.250634	0.305046	0.273128	0.066749		0.0194986	0.019499	0.019499	0.0587332	0.069852	0.028096	0.0221916		0.097926	0.047436	0.015587	0.0404185	0.065054	0.0296019	0.01713
579	38.6	0.159563	0.227592	0.206625	0.229238	0.184641	0.208589	0.155696	0.300022	0.117836	0.171119	0.244296	0.18053	0.270136	0.072204	0.233358	0.300138	0.276303	0.06855		0.0310535	0.031054	0.031054	0.0573805	0.075837	0.0273415	0.029338		0.079804	0.060606	0.016203	0.0452675	0.059203	0.0321736	0.020446
580	38.6667	0.162101	0.225075	0.192617	0.230496	0.107742	0.20853	0.155234	0.291469	0.097789	0.172332	0.240701	0.187678	0.283894	0.068741	0.235458	0.298597	0.274291	0.081655		0.0293389	0.029339	0.029339	0.0499803	0.055671	0.0207599	0.0249988		0.082531	0.061044	0.021818	0.0344828	0.066484	0.0283276	0.022509
581	38.7333	0.161527	0.232683	0.188958	0.221355	0.121493	0.208842	0.144747	0.297513	0.118952	0.171656	0.247743	0.194402	0.268332	0.071906	0.238129	0.300506	0.266871	0.084101		0.0248997	0.0249	0.0249	0.0544703	0.047137	0.0241034	0.0249214		0.085899	0.059669	0.018998	0.041286	0.056783	0.0261267	0.02262
582	38.8	0.152437	0.230617	0.202255	0.222884	0.1379	0.204326	0.150481	0.304019	0.094353	0.169551	0.258369	0.186117	0.262893	0.063884	0.235834	0.28573	0.25966	0.099812		0.0284377	0.028438	0.028438	0.0591489	0.071572	0.0287037	0.0266145		0.102998	0.064713	0.024258	0.0370187	0.067535	0.0290114	0.020498
583	38.8667	0.158065	0.221638	0.195197	0.226453	0.143795	0.196314	0.160243	0.298853	0.110792	0.168599	0.276195	0.198358	0.286513	0.058215	0.241181	0.27991	0.261171	0.053366		0.0279417	0.027942	0.027942	0.0538776	0.073868	0.0285497	0.0230602		0.097904	0.081123	0.023228	0.041844	0.065639	0.0270695	0.02119
584	38.9333	0.159044	0.225527	0.201689	0.216173	0.135695	0.198479	0.151402	0.301262	0.117515	0.167553	0.28489	0.192025	0.265639	0.061326	0.244707	0.288225	0.255033	0.079866		0.0251237	0.025124	0.025124	0.0491828	0.056842	0.026749	0.0280855		0.083163	0.090446	0.020388	0.0395595	0.057854	0.0274981	0.022603
585	39	0.162423	0.214956	0.192832	0.217223	0.118625	0.194523	0.15868	0.307308	0.103365	0.158808	0.29437	0.196194	0.270431	0.059732	0.259017	0.267408	0.271544	0.059805		0.0238002	0.0238	0.0238	0.0501807	0.073149	0.0265353	0.0287772		0.087664	0.075406	0.009242	0.0554323	0.060553	0.0303975	0.024768
586	39.0667	0.164034	0.214	0.1942	0.222385	0.160706	0.213954	0.148561	0.322634	0.099187	0.161743	0.304656	0.198315	0.260642	0.05431	0.2413	0.283633	0.252639	0.092534		0.0234467	0.023447	0.023447	0.0479876	0.052809	0.03311	0.0319149		0.098225	0.111553	0.024339	0.0451047	0.053405	0.0348576	0.020114
587	39.1333	0.16541	0.223373	0.19823	0.214767	0.15138	0.193557	0.162951	0.317123	0.056874	0.164318	0.295762	0.214254	0.266911	0.057996	0.230305	0.280178	0.234933	0.06529		0.0279434	0.027943	0.027943	0.046136	0.058592	0.0314311	0.0232626		0.111473	0.129601	0.021562	0.0324324	0.051999	0.0298762	0.014738
588	39.2	0.162461	0.216774	0.198677	0.227672	0.097775	0.180156	0.175276	0.314907	0.053381	0.163228	0.31374	0.214531	0.276673	0.064119	0.237549	0.283533	0.244646	0.114766		0.0309478	0.030948	0.030948	0.0411851	0.053129	0.0344009	0.0237525		0.087737	0.140371	0.029191	0.0329393	0.055912	0.0359629	0.022371
589	39.2667	0.160867	0.221751	0.209108	0.228118	0.132779	0.182062	0.174994	0.309766	0.060172	0.161283	0.306885	0.213855	0.276608	0.052225	0.218104	0.279946	0.231318	0.145357		0.0253101	0.02531	0.02531	0.0481689	0.064529	0.034642	0.0249311		0.096546	0.136805	0.032277	0.042862	0.043703	0.029763	0.016963
590	39.3333	0.162648	0.222262	0.206646	0.230732	0.084131	0.188311	0.170594	0.289662	0.064853	0.147288	0.303022	0.220831	0.261044	0.043642	0.238449	0.293335	0.242969	0.210853		0.0288714	0.028871	0.028871	0.0478794	0.040885	0.0378378	0.0199359		0.075343	0.103933	0.040992	0.0468584	0.055135	0.0336807	0.022153
591	39.4	0.160517	0.231812	0.208796	0.221576	0.132297	0.197079	0.178109	0.284969	0.092812	0.162055	0.309538	0.212654	0.269918	0.0601	0.254802	0.270654	0.201891	0.131298		0.0262225	0.026223	0.026223	0.0459067	0.052951	0.0400234	0.0218254		0.067424	0.105286	0.031284	0.0397088	0.046293	0.0379257	0.015101
592	39.4667	0.154686	0.224062	0.204798	0.230907	0.122285	0.201346	0.18682	0.296133	0.107163	0.166667	0.322549	0.212282	0.280723	0.057854	0.267109	0.269712	0.216196	0.149245		0.0257774	0.025777	0.025777	0.0519802	0.031887	0.0387655	0.0184314		0.078337	0.074058	0.030438	0.0670147	0.040299	0.022816	0.025399
593	39.5333	0.166489	0.216902	0.218448	0.221344	0.12424	0.197554	0.202211	0.303023	0.106317	0.167452	0.328	0.213796	0.286148	0.059714	0.254277	0.276805	0.217172	0.123843		0.0310779	0.031078	0.031078	0.05032	0.051234	0.0405959	0.0251999		0.095154	0.141459	0.02292	0.0534157	0.037563	0.0281972	0.028141
594	39.6	0.172304	0.215837	0.213164	0.235417	0.130256	0.195415	0.198358	0.32801	0.116883	0.157248	0.331679	0.216139	0.295491	0.060581	0.268525	0.273537	0.215552	0.128246		0.0311875	0.031188	0.031188	0.0544908	0.041062	0.0444079	0.0221668		0.10937	0.077043	0.029112	0.0599008	0.046115	0.0265896	0.016988
595	39.6667	0.167009	0.216414	0.2036	0.229088	0.141976	0.198629	0.189881	0.330057	0.0712	0.168894	0.316646	0.21735	0.310204	0.051415	0.26999	0.290833	0.197282	0.184314		0.0298885	0.029889	0.029889	0.0519238	0.041764	0.0486334	0.0197587		0.091007	0.068528	0.032778	0.02885	0.04362	0.0286046	0.018929
596	39.7333	0.163728	0.225035	0.205581	0.234724	0.126795	0.191078	0.180214	0.336792	0.055215	0.169347	0.300429	0.20137	0.316964	0.074746	0.278751	0.296667	0.210637	0.126542		0.030536	0.030536	0.030536	0.0488567	0.051624	0.0518433	0.0256206		0.074829	0.081694	0.032974	0.0423628	0.049	0.0347859	0.021417
597	39.8	0.155171	0.221556	0.21413	0.238916	0.155159	0.191589	0.174002	0.321633	0.050882	0.175765	0.30291	0.203742	0.325271	0.066175	0.263939	0.290172	0.201283	0.09148		0.0351895	0.03519	0.03519	0.0496668	0.032672	0.0577926	0.0237354		0.075914	0.062374	0.029003	0.043257	0.044643	0.0346011	0.022786
598	39.8667	0.162346	0.22091	0.207979	0.243353	0.168514	0.193387	0.170716	0.327569	0.053449	0.17553	0.304485	0.192318	0.310982	0.072043	0.269915	0.291488	0.197347	0.072499		0.0320978	0.032098	0.032098	0.0488021	0.052733	0.0625432	0.0184071		0.058466	0.055178	0.034454	0.0352174	0.042259	0.0386819	0.016654
599	39.9333	0.164297	0.221462	0.210914	0.246766	0.153403	0.206473	0.179778	0.303201	0.049536	0.172385	0.310331	0.201128	0.315465	0.066768	0.266022	0.295733	0.210793	0.13541		0.0349878	0.034988	0.034988	0.0476059	0.045684	0.0626441	0.017841		0.080934	0.046521	0.030145	0.0628466	0.036585	0.0356916	0.016266
600	40	0.16474	0.226271	0.21738	0.256514	0.180704	0.204977	0.194673	0.302912	0.070462	0.168482	0.306048	0.190239	0.331351	0.090909	0.280965	0.292017	0.193684	0.165836		0.0307102	0.03071	0.03071	0.0447741	0.041784	0.0804311	0.0244569		0.083204	0.041313	0.032905	0.026504	0.040794	0.0496506	0.019241
601	40.0667	0.16657	0.22501	0.204034	0.25721	0.146845	0.214613	0.184452	0.302925	0.06312	0.162432	0.304167	0.199773	0.320099	0.051195	0.274165	0.295798	0.196915	0.141457		0.0350737	0.035074	0.035074	0.0449378	0.028313	0.0745941	0.0249788		0.124668	0.044879	0.030085	0.0379747	0.049104	0.0413878	0.019934
602	40.1333	0.168675	0.225222	0.184419	0.244292	0.132405	0.216386	0.180449	0.285127	0.062672	0.16461	0.308029	0.193419	0.318186	0.068773	0.277122	0.30136	0.18978	0.097084		0.0334899	0.03349	0.03349	0.0437974	0.042495	0.0815674	0.0214383		0.073113	0.045856	0.031367	0.0344577	0.046457	0.0438603	0.019173
603	40.2	0.169219	0.23036	0.190583	0.256533	0.146412	0.222324	0.176742	0.287956	0.060219	0.183673	0.321616	0.195174	0.316731	0.047616	0.274053	0.293994	0.189724	0.109894		0.0254268	0.025427	0.025427	0.0464151	0.041976	0.0972799	0.0211516		0.065495	0.046122	0.031889	0.0424668	0.041032	0.0412773	0.016419
604	40.2667	0.170547	0.237575	0.183277	0.25172	0.166299	0.224913	0.175517	0.299961	0.06034	0.196896	0.318265	0.199326	0.316251	0.042085	0.261215	0.290833	0.181947	0.106454		0.0317301	0.03173	0.03173	0.0444853	0.039238	0.0936655	0.0233918		0.071485	0.043516	0.026609	0.0301954	0.043619	0.0438242	0.018044
605	40.3333	0.172348	0.226622	0.184865	0.249848	0.17105	0.226798	0.178083	0.293775	0.063889	0.207865	0.321556	0.203413	0.314427	0.048533	0.271783	0.286985	0.171509	0.108855		0.0326546	0.032655	0.032655	0.0531409	0.041418	0.0963342	0.0250879		0.078079	0.04375	0.029309	0.0286291	0.042051	0.042885	0.022399
606	40.4	0.173405	0.219524	0.175126	0.25685	0.15485	0.236661	0.176081	0.286046	0.04832	0.18824	0.315104	0.222021	0.313893	0.053767	0.25629	0.292094	0.170726	0.102187		0.0303091	0.030309	0.030309	0.048369	0.036618	0.106926	0.0208758		0.055423	0.039495	0.02509	0.0532151	0.039644	0.0403232	0.019609
607	40.4667	0.179074	0.197903	0.186698	0.263555	0.031257	0.233599	0.178596	0.302272	0.114554	0.203407	0.327833	0.234415	0.302123	0.046676	0.260129	0.300242	0.177542	0.081348		0.030326	0.030326	0.030326	0.0509259	0.041713	0.113588	0.0246914		0.057416	0.040017	0.034106	0.0506016	0.041249	0.035974	0.016544
608	40.5333	0.180039	0.213362	0.190207	0.257906	0.132847	0.231186	0.182918	0.30188	0.034606	0.181048	0.321988	0.232151	0.309016	0.040482	0.237615	0.306955	0.188846	0.074462		0.0271013	0.027101	0.027101	0.0408333	0.035805	0.11581	0.0240282		0.094629	0.037728	0.033069	0.0358047	0.045798	0.0373744	0.015134
609	40.6	0.179773	0.204275	0.188249	0.263784	0.118663	0.223503	0.185027	0.287093	0.057526	0.205439	0.328616	0.231434	0.285886	0.039714	0.239545	0.296385	0.18958	0.064919		0.0303259	0.030326	0.030326	0.0457345	0.035814	0.0909846	0.0244671		0.095221	0.040712	0.037401	0.0427854	0.039139	0.0349109	0.017719
610	40.6667	0.170922	0.220706	0.179277	0.280414	0.079453	0.23439	0.181014	0.2951	0.053924	0.194792	0.335468	0.210843	0.279688	0.054226	0.200506	0.289206	0.178092	0.069292		0.02121	0.02121	0.02121	0.0504518	0.034723	0.116338	0.0245447		0.058443	0.044768	0.039227	0.0446989	0.040724	0.0359797	0.017364
611	40.7333	0.177593	0.220043	0.180242	0.269223	0.177745	0.224949	0.192033	0.294663	0.079598	0.219396	0.32888	0.209509	0.270359	0.065496	0.183456	0.293686	0.195096	0.063938		0.0268939	0.026894	0.026894	0.0525261	0.034278	0.124558	0.024797		0.081537	0.047195	0.038186	0.0485571	0.039515	0.0323448	0.023594
612	40.8	0.177244	0.218543	0.184317	0.287511	0.023071	0.237216	0.192407	0.289319	0.063308	0.218125	0.325335	0.211457	0.278501	0.078986	0.176891	0.293966	0.203335	0.08546		0.0303729	0.030373	0.030373	0.0436293	0.037548	0.123045	0.0266405		0.0864	0.049872	0.024581	0.0469183	0.037788	0.0329374	0.017581
613	40.8667	0.173715	0.224063	0.180658	0.29541	0.118112	0.236683	0.195819	0.272596	0.063755	0.226076	0.334891	0.208449	0.296574	0.069614	0.190012	0.305898	0.201038	0.082701		0.0252521	0.025252	0.025252	0.0472495	0.036849	0.0555795	0.0261438		0.084659	0.051772	0.032056	0.0362293	0.040472	0.0281905	0.021471
614	40.9333	0.170478	0.230383	0.184351	0.294204	0.150625	0.233813	0.198773	0.285051	0.04601	0.196239	0.333426	0.209728	0.291507	0.077939	0.179986	0.30521	0.206671	0.09217		0.0258162	0.025816	0.025816	0.0576054	0.032667	0.0546587	0.0284004		0.078711	0.044776	0.027558	0.0430468	0.036102	0.0295234	0.021328
615	41	0.171775	0.225719	0.177629	0.284265	0.129038	0.231378	0.198367	0.280428	0.049627	0.199779	0.335876	0.218145	0.283713	0.053738	0.203119	0.310814	0.210935	0.071181		0.0282239	0.028224	0.028224	0.0494973	0.03476	0.055362	0.0224488		0.092264	0.043813	0.039567	0.0390625	0.048589	0.0270637	0.018239
616	41.0667	0.16241	0.222526	0.178943	0.284663	0.106763	0.227008	0.200421	0.273922	0.049414	0.209777	0.317335	0.214296	0.284369	0.079648	0.205121	0.309758	0.198286	0.073959		0.0328777	0.032878	0.032878	0.0519077	0.035136	0.0519187	0.0239832		0.085569	0.058207	0.028019	0.0515306	0.056161	0.0276721	0.025471
617	41.1333	0.16427	0.217214	0.179638	0.273456	0.12449	0.224761	0.202976	0.256254	0.066718	0.212013	0.324467	0.222171	0.278961	0.071837	0.217947	0.310628	0.212861	0.174257		0.0230268	0.023027	0.023027	0.0553581	0.033918	0.0539528	0.0304734		0.071565	0.042561	0.023576	0.0456328	0.044795	0.0272989	0.022041
618	41.2	0.162944	0.221394	0.178279	0.264933	0.125363	0.214773	0.18946	0.281238	0.068099	0.20334	0.307132	0.216144	0.285521	0.081741	0.204205	0.304745	0.199346	0.229251		0.029664	0.029664	0.029664	0.0484306	0.033984	0.0499803	0.0257271		0.064515	0.0469	0.026276	0.0593696	0.042748	0.0227837	0.016266
619	41.2667	0.164363	0.212493	0.178123	0.28081	0.100317	0.212587	0.20859	0.266994	0.065232	0.226435	0.29891	0.218972	0.274265	0.070761	0.194354	0.305373	0.218835	0.271764		0.0273567	0.027357	0.027357	0.0548691	0.03722	0.0513341	0.0195153		0.090258	0.050654	0.02162	0.0343904	0.040498	0.0278934	0.024512
620	41.3333	0.161404	0.212807	0.174579	0.282809	0.129224	0.216894	0.205261	0.263555	0.120405	0.23149	0.275628	0.224165	0.273065	0.065002	0.227121	0.317668	0.220369	0.245563		0.0284354	0.028435	0.028435	0.0562061	0.039002	0.0559906	0.0264239		0.078408	0.069961	0.024804	0.0410138	0.037645	0.031746	0.021481
621	41.4	0.160956	0.206788	0.175473	0.278275	0.123763	0.222542	0.208227	0.261693	0.046069	0.199602	0.282073	0.22746	0.27354	0.071288	0.216416	0.321946	0.210902	0.302156		0.0292472	0.029247	0.029247	0.0556002	0.04325	0.0516393	0.0245545		0.096052	0.063302	0.036831	0.0360711	0.040164	0.0325103	0.016406
622	41.4667	0.159084	0.204833	0.169413	0.28018	0.105707	0.230522	0.224797	0.243297	0.045916	0.203051	0.291728	0.219057	0.276007	0.054618	0.222938	0.315387	0.215088	0.359394		0.0301122	0.030112	0.030112	0.0471478	0.039985	0.0525371	0.0317566		0.070524	0.080853	0.030032	0.0263557	0.041632	0.0314467	0.021162
623	41.5333	0.160619	0.20839	0.170648	0.291612	0.095855	0.228775	0.20919	0.227898	0.047948	0.196973	0.292124	0.22771	0.250727	0.061485	0.171744	0.306588	0.204457	0.29497		0.0258189	0.025819	0.025819	0.0495368	0.040841	0.0517922	0.0253672		0.072581	0.100299	0.026531	0.0415468	0.044339	0.0343588	0.020035
624	41.6	0.156532	0.210466	0.166848	0.28881	0.132441	0.237088	0.218198	0.252693	0.061823	0.193406	0.289848	0.235083	0.258732	0.086575	0.221675	0.298924	0.21162	0.319951		0.0285926	0.028593	0.028593	0.0448168	0.035873	0.0540221	0.0303393		0.087838	0.102071	0.037803	0.0468103	0.040799	0.0279395	0.021431
625	41.6667	0.151296	0.219288	0.141017	0.280616	0.140537	0.250891	0.219012	0.266621	0.06428	0.216673	0.277986	0.227116	0.257449	0.070906	0.161212	0.290202	0.207907	0.318188		0.0248316	0.024832	0.024832	0.0493223	0.041091	0.0560278	0.0286578		0.093132	0.096823	0.032131	0.0473	0.0476	0.0362483	0.018652
626	41.7333	0.153172	0.212157	0.161344	0.285977	0.104049	0.255494	0.217036	0.262873	0.047843	0.213635	0.29282	0.225604	0.249839	0.064836	0.21015	0.2833	0.203038	0.262917		0.0225056	0.022506	0.022506	0.0491991	0.041861	0.0504829	0.0204563		0.085002	0.091167	0.034039	0.0450457	0.051476	0.0357143	0.019947
627	41.8	0.155894	0.211627	0.186784	0.281786	0.103175	0.252862	0.221257	0.25603	0.045059	0.211549	0.29881	0.231933	0.257492	0.058907	0.187149	0.289432	0.203878	0.357182		0.0243808	0.024381	0.024381	0.0528844	0.043381	0.0501778	0.0222222		0.078939	0.078341	0.046802	0.0654561	0.047732	0.0323727	0.023651
628	41.8667	0.151465	0.208255	0.190016	0.276536	0.130828	0.235811	0.224362	0.257812	0.042553	0.209007	0.294286	0.236019	0.246334	0.076616	0.211375	0.302868	0.195124	0.357598		0.0263852	0.026385	0.026385	0.0509182	0.039434	0.0511688	0.0270119		0.069371	0.067977	0.02921	0.0666911	0.043027	0.0313978	0.026507
629	41.9333	0.150331	0.216065	0.18308	0.281693	0.108416	0.236032	0.231777	0.248663	0.056285	0.213481	0.312084	0.234415	0.254217	0.067732	0.203506	0.291231	0.203404	0.392668		0.0341085	0.034109	0.034109	0.0501739	0.042522	0.0481262	0.0253884		0.076214	0.061507	0.033875	0.0420382	0.038041	0.0347193	0.019939
630	42	0.155337	0.216397	0.191746	0.28082	0.099974	0.245711	0.226827	0.262978	0.059969	0.205555	0.289089	0.234272	0.252857	0.057464	0.200388	0.304695	0.204053	0.480441		0.028629	0.028629	0.028629	0.0491174	0.046917	0.0501942	0.0237903		0.089619	0.060794	0.025086	0.043801	0.045426	0.0256396	0.022342
631	42.0667	0.149787	0.215049	0.201338	0.274485	0.123539	0.245331	0.224173	0.264499	0.064139	0.190221	0.311984	0.242163	0.239882	0.0623	0.193823	0.28094	0.193848	0.348306		0.0302872	0.030287	0.030287	0.0471833	0.041209	0.0499605	0.0250308		0.063214	0.064568	0.033189	0.0359656	0.049211	0.0329066	0.02543
632	42.1333	0.149269	0.207062	0.187267	0.272004	0.096214	0.227877	0.232054	0.289579	0.064612	0.203127	0.314149	0.24	0.2575	0.061576	0.187904	0.289695	0.201854	0.225998		0.0299424	0.029942	0.029942	0.0446775	0.036877	0.052312	0.0223232		0.099038	0.068686	0.027818	0.042165	0.051037	0.0335977	0.027756
633	42.2	0.148743	0.21299	0.19258	0.266057	0.102471	0.246006	0.229951	0.308527	0.061994	0.204143	0.316726	0.242668	0.262896	0.076359	0.198791	0.285592	0.194794	0.09397		0.0221032	0.022103	0.022103	0.0465116	0.041117	0.0465297	0.0302379		0.108072	0.052946	0.029265	0.0458264	0.064852	0.0383135	0.023842
634	42.2667	0.153133	0.219388	0.190596	0.263982	0.068393	0.232641	0.21261	0.283848	0.050039	0.183872	0.300855	0.241183	0.278235	0.052552	0.222637	0.272289	0.202241	0.087353		0.0283876	0.028388	0.028388	0.0537289	0.038373	0.0502751	0.0262907		0.096756	0.053768	0.03236	0.0381156	0.055938	0.0365063	0.025164
635	42.3333	0.150695	0.216837	0.190985	0.258014	0.107536	0.249609	0.204041	0.291029	0.061093	0.198749	0.304774	0.23653	0.272366	0.078144	0.239381	0.273541	0.205233	0.142803		0.0259868	0.025987	0.025987	0.058277	0.040015	0.0491262	0.0226464		0.092432	0.056957	0.024469	0.039276	0.057209	0.0412649	0.026729
636	42.4	0.15096	0.217011	0.192667	0.248498	0.112215	0.235322	0.20389	0.290957	0.053084	0.195492	0.304256	0.238607	0.283315	0.087521	0.238913	0.277536	0.198641	0.096352		0.0278	0.0278	0.0278	0.0640959	0.037001	0.0520388	0.0194831		0.055716	0.048179	0.030354	0.0251508	0.067174	0.0373796	0.022195
637	42.4667	0.150399	0.212016	0.19175	0.235963	0.131638	0.230938	0.206752	0.295313	0.078496	0.210391	0.315062	0.242381	0.275326	0.095258	0.302919	0.272109	0.193487	0.120235		0.0245337	0.024534	0.024534	0.0513099	0.038414	0.0480594	0.0176084		0.10083	0.041022	0.032058	0.0308714	0.067386	0.0368817	0.025528
638	42.5333	0.149496	0.210265	0.181535	0.230421	0.092132	0.234644	0.201022	0.285519	0.077717	0.23103	0.32199	0.257937	0.237096	0.091721	0.262229	0.249562	0.203257	0.073769		0.0208173	0.020817	0.020817	0.0489694	0.03387	0.0530221	0.0206467		0.086503	0.051008	0.032023	0.04941	0.051997	0.038872	0.025638
639	42.6	0.148995	0.214169	0.179201	0.217132	0.100643	0.230544	0.210532	0.271949	0.080041	0.212506	0.326764	0.259107	0.252096	0.085676	0.219801	0.251071	0.211183	0.111426		0.0208538	0.020854	0.020854	0.0504552	0.032119	0.0494725	0.0251052		0.089126	0.049341	0.027689	0.0471631	0.065114	0.04078	0.027419
640	42.6667	0.146388	0.220813	0.180113	0.228242	0.105251	0.248725	0.203506	0.284823	0.074908	0.209536	0.322246	0.254644	0.237633	0.097017	0.231826	0.266094	0.215462	0.084249		0.0297328	0.029733	0.029733	0.0518114	0.032345	0.0531746	0.0175295		0.069061	0.041633	0.029365	0.0465231	0.060241	0.0356688	0.023997
641	42.7333	0.145613	0.213003	0.179121	0.202841	0.145629	0.240836	0.206774	0.258512	0.090583	0.212598	0.304834	0.24877	0.230586	0.088454	0.21698	0.273744	0.217631	0.102093		0.0301947	0.030195	0.030195	0.050905	0.036003	0.0518053	0.0185042		0.077009	0.039095	0.028345	0.0476787	0.062057	0.0363418	0.026241
642	42.8	0.153846	0.224273	0.174349	0.208778	0.111351	0.239153	0.205056	0.270284	0.07015	0.217509	0.310994	0.260266	0.23052	0.101658	0.262769	0.274789	0.227446	0.107944		0.032737	0.032737	0.032737	0.0553564	0.028701	0.0565441	0.0253521		0.094888	0.04609	0.026928	0.0308	0.052693	0.032208	0.029642
643	42.8667	0.155388	0.218366	0.175843	0.209479	0.114827	0.236475	0.20273	0.259493	0.083832	0.21636	0.295031	0.261825	0.226545	0.094117	0.251634	0.246078	0.188702	0.101432		0.030087	0.030087	0.030087	0.0572451	0.03198	0.0573768	0.0202161		0.078403	0.040197	0.033739	0.0506912	0.062886	0.0312564	0.025798
644	42.9333	0.150391	0.219144	0.174668	0.206809	0.105732	0.230231	0.215728	0.261735	0.075419	0.2255	0.304407	0.257845	0.227626	0.089954	0.234032	0.246282	0.195593	0.093954		0.031106	0.031106	0.031106	0.0494713	0.035149	0.0498585	0.0289957		0.09195	0.038047	0.034	0.0489946	0.064696	0.0343159	0.024981
645	43	0.15533	0.220798	0.17283	0.220895	0.097663	0.248111	0.195884	0.282154	0.072517	0.222595	0.2862	0.256004	0.234306	0.099475	0.283381	0.237968	0.242466	0.152408		0.0263468	0.026347	0.026347	0.0650437	0.03691	0.0530008	0.0251046		0.088812	0.043758	0.029204	0.0489736	0.070324	0.0313725	0.028962
646	43.0667	0.148979	0.220514	0.179344	0.222794	0.085951	0.244514	0.190985	0.30228	0.067388	0.237054	0.288521	0.252103	0.213922	0.088046	0.280578	0.251283	0.223402	0.127312		0.0280923	0.028092	0.028092	0.0719204	0.02827	0.048659	0.0189729		0.08964	0.035675	0.028862	0.030475	0.065705	0.0324232	0.025373
647	43.1333	0.163695	0.222127	0.169285	0.218147	0.072559	0.252932	0.203759	0.308779	0.094852	0.200381	0.282912	0.257829	0.245329	0.09717	0.29573	0.258644	0.228379	0.172573		0.0321124	0.032112	0.032112	0.059171	0.036371	0.0493827	0.0210485		0.087218	0.040546	0.026154	0.0198954	0.066611	0.0379072	0.024231
648	43.2	0.158402	0.216774	0.169273	0.22127	0.090379	0.255582	0.192211	0.308708	0.085952	0.199566	0.283323	0.261703	0.259216	0.103351	0.267722	0.259847	0.244366	0.026917		0.026545	0.026545	0.026545	0.0573349	0.033604	0.0528938	0.0215505		0.09257	0.031758	0.02663	0.0463723	0.063045	0.0275007	0.03377
649	43.2667	0.164053	0.224078	0.17239	0.224336	0.093804	0.259457	0.195599	0.300912	0.101232	0.196713	0.290119	0.259035	0.266109	0.096783	0.298418	0.258079	0.261924	0.173254		0.0320128	0.032013	0.032013	0.0605936	0.035395	0.0529048	0.0216883		0.089005	0.032167	0.031965	0.0399695	0.059072	0.0260939	0.031104
650	43.3333	0.155919	0.228048	0.166667	0.221207	0.114744	0.243481	0.184158	0.307077	0.073261	0.205216	0.287422	0.253098	0.257875	0.095649	0.300334	0.244741	0.252939	0.157739		0.0322327	0.032233	0.032233	0.0528307	0.042616	0.0550076	0.0140406		0.070374	0.0404	0.029511	0.0317224	0.058094	0.0245827	0.040884
651	43.4	0.158454	0.217755	0.166327	0.224092	0.115211	0.228844	0.186741	0.30349	0.080559	0.215999	0.297055	0.24736	0.240078	0.097736	0.293913	0.255376	0.254537	0.100956		0.0377953	0.037795	0.037795	0.067945	0.040038	0.0527745	0.0170297		0.081062	0.03342	0.036036	0.0250822	0.057075	0.0253011	0.036193
652	43.4667	0.160903	0.22545	0.163196	0.227559	0.118381	0.228079	0.180007	0.32203	0.092552	0.20937	0.295238	0.255789	0.235195	0.083405	0.269316	0.244783	0.230262	0.098071		0.0340605	0.034061	0.034061	0.0782208	0.041517	0.0464	0.0171866		0.118886	0.037311	0.021204	0.0364768	0.057928	0.0244881	0.033953
653	43.5333	0.161631	0.22834	0.169117	0.236607	0.138105	0.230671	0.166474	0.324469	0.1	0.230774	0.293372	0.244548	0.253154	0.090564	0.29411	0.267988	0.233093	0.135768		0.0260073	0.026007	0.026007	0.0620484	0.036387	0.0539784	0.0290618		0.080905	0.038657	0.046686	0.0350343	0.065234	0.0278148	0.03363
654	43.6	0.162119	0.228448	0.169923	0.231186	0.162387	0.238255	0.168691	0.305078	0.119065	0.224796	0.308763	0.246937	0.252863	0.097867	0.249301	0.260478	0.223514	0.054093		0.0352987	0.035299	0.035299	0.071517	0.036275	0.0519992	0.0317965		0.06051	0.03573	0.022187	0.0457265	0.052716	0.0296663	0.037895
655	43.6667	0.156197	0.227261	0.162839	0.231018	0.152036	0.241031	0.160648	0.303324	0.115012	0.222953	0.299254	0.24389	0.246987	0.105101	0.275562	0.259447	0.214286	0.14879		0.040354	0.040354	0.040354	0.0796083	0.030387	0.0506182	0.0284993		0.063819	0.042605	0.02881	0.0429558	0.052932	0.0301916	0.033617
656	43.7333	0.167656	0.197161	0.167135	0.234222	0.161904	0.243859	0.154272	0.290776	0.117199	0.233488	0.303405	0.235648	0.248111	0.086558	0.289061	0.260869	0.220459	0.144168		0.0366361	0.036636	0.036636	0.0693878	0.034958	0.0574539	0.0298635		0.085933	0.033501	0.024616	0.0580348	0.05571	0.0312056	0.024793
657	43.8	0.168952	0.181381	0.171018	0.23856	0.145459	0.237903	0.165818	0.288724	0.120417	0.234438	0.310345	0.225634	0.250417	0.112432	0.288136	0.247468	0.21341	0.107681		0.037463	0.037463	0.037463	0.0718126	0.032558	0.0508744	0.0271761		0.07839	0.046579	0.034166	0.0553841	0.064785	0.0289423	0.032451
658	43.8667	0.167017	0.178537	0.168924	0.236906	0.138029	0.25031	0.150577	0.291368	0.106198	0.251033	0.300129	0.22622	0.250739	0.095492	0.283545	0.248638	0.191704	0.12118		0.0292021	0.029202	0.029202	0.0665151	0.036263	0.0491334	0.0276911		0.085911	0.044885	0.023899	0.0493779	0.061472	0.0360876	0.026821
659	43.9333	0.175094	0.188162	0.172927	0.236673	0.137482	0.251464	0.157178	0.279382	0.120594	0.253506	0.309201	0.228608	0.250756	0.100427	0.326393	0.253998	0.202017	0.122831		0.0318521	0.031852	0.031852	0.0670181	0.033145	0.0504862	0.0274236		0.072584	0.04335	0.029753	0.0683442	0.062362	0.0282908	0.02178
660	44	0.171791	0.180685	0.17263	0.237276	0.137669	0.241948	0.146	0.28511	0.117804	0.248583	0.309598	0.212652	0.242759	0.098355	0.286418	0.255927	0.188774	0.141571		0.0309013	0.030901	0.030901	0.0705347	0.036819	0.0556845	0.0278508		0.065967	0.048978	0.026776	0.0449966	0.051998	0.0127085	0.027065
661	44.0667	0.176176	0.195317	0.170112	0.243278	0.102933	0.24068	0.14313	0.283089	0.121239	0.250802	0.311691	0.217353	0.239433	0.098303	0.303189	0.260716	0.169056	0.105613		0.039268	0.039268	0.039268	0.063963	0.035101	0.0532819	0.027989		0.078299	0.04723	0.037068	0.0520231	0.066496	0.0301488	0.023955
662	44.1333	0.172101	0.202137	0.165088	0.239857	0.083767	0.230153	0.152157	0.280721	0.13418	0.234732	0.31009	0.217482	0.242755	0.081655	0.308114	0.256032	0.181969	0.135932		0.0291424	0.029142	0.029142	0.0713564	0.042673	0.0499601	0.0290473		0.061376	0.059329	0.029577	0.0335604	0.048813	0.0249318	0.022712
663	44.2	0.180204	0.200022	0.160388	0.233742	0.079648	0.240712	0.156504	0.289184	0.128553	0.223851	0.313399	0.205583	0.227923	0.094546	0.306909	0.262276	0.161014	0.10469		0.0305762	0.030576	0.030576	0.0634735	0.041295	0.0476006	0.0297104		0.078974	0.048381	0.029616	0.0560484	0.059218	0.0353496	0.024869
664	44.2667	0.185076	0.207057	0.166446	0.237689	0.032227	0.248634	0.146241	0.287216	0.127969	0.226259	0.309361	0.199927	0.246574	0.098512	0.310723	0.250677	0.169394	0.113627		0.0347695	0.03477	0.03477	0.0734887	0.042466	0.0457341	0.0253758		0.070045	0.054819	0.03045	0.035217	0.057661	0.0289678	0.028772
665	44.3333	0.187736	0.219	0.158736	0.239341	0.015745	0.232191	0.137663	0.288302	0.142036	0.228625	0.300498	0.207663	0.236988	0.10401	0.318456	0.246464	0.161965	0.148263		0.0323926	0.032393	0.032393	0.0578967	0.042685	0.0443263	0.0258261		0.072065	0.05478	0.022551	0.0259056	0.059359	0.033734	0.029833
666	44.4	0.189555	0.200708	0.168683	0.230189	0.062302	0.237377	0.140273	0.290004	0.122756	0.233823	0.29814	0.213676	0.234242	0.101662	0.322939	0.25648	0.165459	0.110266		0.0308611	0.030861	0.030861	0.0642177	0.044025	0.047767	0.0272308		0.068861	0.06691	0.033426	0.0403042	0.053212	0.0311368	0.030238
667	44.4667	0.186833	0.209451	0.173497	0.239405	0.037065	0.242386	0.13998	0.284594	0.136842	0.219889	0.296056	0.215418	0.235932	0.10989	0.333792	0.256133	0.158496	0.121776		0.0290661	0.029066	0.029066	0.0629819	0.042181	0.0440338	0.025338		0.072253	0.074646	0.04059	0.039627	0.046466	0.0363638	0.031568
668	44.5333	0.185217	0.220833	0.142492	0.241531	0.098471	0.228642	0.140216	0.31019	0.128664	0.220232	0.277608	0.212003	0.231149	0.099004	0.308976	0.252057	0.13986	0.073639		0.0325695	0.03257	0.03257	0.0627076	0.043554	0.0470817	0.0281513		0.065233	0.066246	0.035172	0.0301143	0.053183	0.0365297	0.035726
669	44.6	0.193474	0.216348	0.16773	0.251189	0.16028	0.225077	0.150769	0.280512	0.144656	0.228712	0.269785	0.210849	0.238411	0.085811	0.318726	0.253352	0.15782	0.124079		0.0368006	0.036801	0.036801	0.0701506	0.03872	0.048752	0.0351126		0.066547	0.048972	0.048086	0.0404449	0.049789	0.0479201	0.038207
670	44.6667	0.187907	0.22492	0.196775	0.242543	0.037209	0.239805	0.147324	0.282761	0.148418	0.208678	0.264991	0.214794	0.225957	0.084968	0.326767	0.257476	0.155889	0.134824		0.0269511	0.026951	0.026951	0.0590753	0.031674	0.0469778	0.0281135		0.086263	0.052652	0.025696	0.0435754	0.053364	0.0382829	0.02991
671	44.7333	0.181961	0.222692	0.188131	0.262121	0.028035	0.236606	0.13538	0.278552	0.1402	0.207052	0.253712	0.200171	0.235389	0.084726	0.270085	0.25857	0.156446	0.119197		0.028169	0.028169	0.028169	0.0563214	0.031086	0.0489026	0.028158		0.046538	0.057751	0.030825	0.0327658	0.04379	0.0404313	0.028209
672	44.8	0.188511	0.21969	0.193458	0.253315	0.092086	0.24648	0.138053	0.272148	0.139801	0.199039	0.251274	0.207164	0.22635	0.099406	0.293551	0.249421	0.136827	0.101919		0.0279833	0.027983	0.027983	0.0586081	0.028838	0.0458852	0.0233463		0.066211	0.048583	0.027287	0.0422884	0.043213	0.0373327	0.039382
673	44.8667	0.187822	0.216631	0.192683	0.256193	0.065476	0.249431	0.149697	0.263755	0.148515	0.209847	0.252174	0.211128	0.22319	0.09365	0.271473	0.254466	0.156807	0.112365		0.0344696	0.03447	0.03447	0.0517733	0.030077	0.0472603	0.0315385		0.056154	0.062533	0.040864	0.0511364	0.052277	0.0382035	0.02691
674	44.9333	0.185393	0.215245	0.192592	0.264995	0.07027	0.236523	0.142129	0.259644	0.130767	0.206515	0.239409	0.210034	0.232884	0.097305	0.25608	0.256092	0.17042	0.102956		0.0326429	0.032643	0.032643	0.0536297	0.028854	0.0463023	0.0280375		0.116741	0.046353	0.045601	0.0400289	0.046571	0.0326515	0.026471
675	45	0.187727	0.219157	0.202204	0.260326	0.142891	0.246849	0.136044	0.241329	0.108731	0.218915	0.236724	0.219444	0.230455	0.095779	0.246679	0.264662	0.179878	0.115565		0.0291446	0.029145	0.029145	0.0615802	0.029025	0.0471847	0.0269111		0.058748	0.043544	0.032913	0.0360624	0.047242	0.0343466	0.027642
676	45.0667	0.181262	0.207721	0.20444	0.25967	0.126364	0.227045	0.138231	0.240331	0.102407	0.211674	0.239623	0.207688	0.235728	0.07946	0.258641	0.266738	0.172234	0.09807		0.0289679	0.028968	0.028968	0.0634497	0.032107	0.0495053	0.0271458		0.05952	0.039239	0.039238	0.058727	0.04536	0.0333497	0.024356
677	45.1333	0.180126	0.218348	0.207586	0.276296	0.046197	0.24282	0.143573	0.243914	0.098982	0.216878	0.250956	0.210097	0.238087	0.084958	0.241675	0.266637	0.173601	0.120835		0.0317036	0.031704	0.031704	0.0593617	0.029061	0.0520501	0.0272762		0.076183	0.037747	0.030668	0.0558847	0.035531	0.0294216	0.022722
678	45.2	0.176955	0.214525	0.21481	0.266962	0.070381	0.262188	0.158272	0.244603	0.110532	0.220933	0.245023	0.209195	0.235062	0.085742	0.248347	0.267468	0.188953	0.121485		0.0331772	0.033177	0.033177	0.0754579	0.032174	0.0532081	0.0305927		0.079189	0.043845	0.026131	0.0313676	0.047746	0.02844	0.030012
679	45.2667	0.178849	0.206588	0.218517	0.273205	0.060876	0.269757	0.153893	0.254143	0.08822	0.22479	0.233807	0.20942	0.24237	0.085928	0.243676	0.272469	0.177256	0.103977		0.0306415	0.030642	0.030642	0.0595876	0.038506	0.0450066	0.0285051		0.070377	0.040503	0.037719	0.037442	0.040562	0.0281302	0.01451
680	45.3333	0.181007	0.208857	0.216144	0.26385	0.021289	0.309622	0.153561	0.240226	0.087342	0.212487	0.254926	0.213478	0.235578	0.089171	0.260119	0.272551	0.180247	0.084906		0.034728	0.034728	0.034728	0.0537016	0.035907	0.0498084	0.0301832		0.067797	0.041259	0.027119	0.0351377	0.042085	0.031653	0.019547
681	45.4	0.177382	0.201532	0.220348	0.277705	0.067496	0.298559	0.150353	0.236724	0.094864	0.218377	0.24348	0.210139	0.235998	0.075657	0.245258	0.284203	0.188199	0.133209		0.0352337	0.035234	0.035234	0.0573283	0.036545	0.0507379	0.0244556		0.070286	0.04056	0.031109	0.0316727	0.04618	0.0266088	0.021219
682	45.4667	0.181189	0.193239	0.210153	0.2706	0.057453	0.200613	0.145564	0.239236	0.100755	0.224294	0.242885	0.212899	0.233539	0.076679	0.280946	0.280809	0.187838	0.100205		0.0327006	0.032701	0.032701	0.0582485	0.039117	0.0473896	0.0234886		0.066058	0.047335	0.050686	0.0325176	0.035405	0.0245041	0.017563
683	45.5333	0.175888	0.197995	0.174891	0.265617	0.069858	0.2072	0.157882	0.243279	0.089028	0.213204	0.222021	0.206517	0.243501	0.08429	0.246038	0.278252	0.188655	0.098432		0.0355471	0.035547	0.035547	0.0593574	0.038565	0.049585	0.0225989		0.080838	0.0397897	0.037509	0.0350683	0.039192	0.0260331	0.03649
684	45.6	0.175433	0.195034	0.166235	0.272203	0.093822	0.244724	0.146683	0.231684	0.080638	0.223929	0.237911	0.211374	0.235832	0.091859	0.270747	0.284763	0.182228	0.112085		0.0398048	0.039805	0.039805	0.0572119	0.035123	0.0528116	0.0262439		0.065262	0.0478531	0.03727	0.0461272	0.037361	0.0255949	0.03215
685	45.6667	0.175443	0.200923	0.175317	0.269989	0.102659	0.237874	0.15354	0.252212	0.080733	0.217344	0.253275	0.208134	0.222899	0.106204	0.249828	0.283245	0.184499	0.094868		0.0345505	0.034551	0.034551	0.0637899	0.042404	0.0478377	0.0231839		0.047269	0.0652907	0.042079	0.037172	0.038282	0.027851	0.030612
686	45.7333	0.170239	0.207745	0.177978	0.278563	0.120651	0.247836	0.154962	0.246269	0.084134	0.192504	0.248273	0.204591	0.21894	0.076709	0.244534	0.279354	0.187487	0.104321		0.0414134	0.041413	0.041413	0.0605023	0.043321	0.0461416	0.0243807		0.094453	0.0753816	0.058354	0.0471535	0.032801	0.0263459	0.034884
687	45.8	0.173458	0.207683	0.184845	0.272397	0.10306	0.195116	0.150747	0.242218	0.098617	0.190118	0.235495	0.204701	0.234455	0.088639	0.245015	0.286136	0.192747	0.120062		0.0282984	0.028298	0.028298	0.04932	0.047777	0.048676	0.0236427		0.081656	0.065386	0.054762	0.0574257	0.040954	0.0302013	0.028628
688	45.8667	0.167879	0.21587	0.183669	0.281546	0.094486	0.217324	0.157974	0.250895	0.102564	0.182243	0.237624	0.207393	0.220741	0.065229	0.261993	0.277014	0.187141	0.086468		0.0367982	0.036798	0.036798	0.0579873	0.047481	0.0509657	0.0230133		0.063525	0.0610956	0.056597	0.0586826	0.043096	0.0295146	0.028012
689	45.9333	0.161139	0.21151	0.188831	0.278991	0.092686	0.206719	0.156312	0.254964	0.085573	0.180924	0.242443	0.213408	0.230898	0.07269	0.251026	0.274617	0.194957	0.096415		0.0352626	0.035263	0.035263	0.0629477	0.041482	0.0489671	0.0252197		0.071774	0.0670051	0.046624	0.0395651	0.041292	0.0351887	0.029989
690	46	0.168417	0.215591	0.188854	0.277446	0.105002	0.212405	0.159742	0.250128	0.086033	0.175317	0.241076	0.214047	0.229324	0.094753	0.278345	0.271411	0.188834	0.118421		0.0365993	0.036599	0.036599	0.0580423	0.036296	0.0496918	0.0216812		0.064211	0.081201	0.049431	0.0464459	0.047247	0.0303047	0.020899
691	46.0667	0.175619	0.213746	0.18932	0.281476	0.095236	0.210292	0.15175	0.254672	0.075919	0.235492	0.247322	0.207616	0.229048	0.081269	0.239153	0.272113	0.192809	0.103158		0.029838	0.029838	0.029838	0.0618238	0.037924	0.055381	0.0283525		0.090553	0.0522406	0.042634	0.0420607	0.042372	0.0379953	0.021393
692	46.1333	0.17601	0.224106	0.186895	0.284198	0.106119	0.23092	0.150991	0.200178	0.074001	0.233071	0.248822	0.213486	0.238565	0.075992	0.284942	0.267833	0.190433	0.081783		0.0293544	0.029354	0.029354	0.0605144	0.033453	0.0507621	0.0241715		0.069195	0.072035	0.042537	0.0518053	0.043799	0.0388332	0.026021
693	46.2	0.168177	0.224696	0.185468	0.286605	0.088678	0.235405	0.162254	0.206036	0.075924	0.195126	0.251538	0.214521	0.252673	0.091198	0.274832	0.272576	0.206806	0.089834		0.0318637	0.031864	0.031864	0.0532286	0.032355	0.0570587	0.0315021		0.055752	0.0728811	0.049313	0.0541113	0.052692	0.0348196	0.02917
694	46.2667	0.179584	0.225385	0.200346	0.279221	0.073674	0.212942	0.163092	0.223081	0.05602	0.19035	0.232434	0.221005	0.240315	0.084676	0.267444	0.267133	0.198948	0.095585		0.024341	0.024341	0.024341	0.0582728	0.028262	0.0542317	0.0267453		0.056112	0.0730473	0.047807	0.0472408	0.042545	0.0335062	0.027545
695	46.3333	0.174021	0.227246	0.201891	0.280133	0.099266	0.22054	0.153538	0.243291	0.080913	0.177121	0.234237	0.214864	0.249281	0.068265	0.260231	0.261699	0.196995	0.106359		0.032445	0.032445	0.032445	0.0471042	0.02576	0.0563289	0.0308048		0.053634	0.0806582	0.026572	0.0307116	0.048281	0.0366396	0.02809
696	46.4	0.181127	0.22278	0.195672	0.267612	0.095371	0.220625	0.159289	0.243957	0.052651	0.181409	0.223563	0.224017	0.251072	0.0845	0.256961	0.247694	0.202349	0.091837		0.0324622	0.032462	0.032462	0.0547386	0.02709	0.0469174	0.0275368		0.092381	0.09327	0.031308	0.0360805	0.04545	0.0370518	0.026235
697	46.4667	0.17046	0.226224	0.20551	0.268434	0.08912	0.223753	0.154883	0.245693	0.048094	0.193244	0.2311	0.227732	0.248811	0.087599	0.249355	0.255256	0.218828	0.118162		0.0291188	0.029119	0.029119	0.0566302	0.028549	0.0468812	0.0320843		0.055252	0.0684532	0.054492	0.0493206	0.050195	0.0375293	0.024565
698	46.5333	0.177179	0.228649	0.213926	0.259556	0.081477	0.214604	0.159267	0.242256	0.058124	0.213813	0.219787	0.231466	0.25708	0.083206	0.257867	0.257305	0.22713	0.120017		0.0319369	0.031937	0.031937	0.057801	0.023922	0.0540872	0.0364179		0.064877	0.0787996	0.040931	0.0289519	0.055492	0.0344692	0.030714
699	46.6	0.176647	0.221944	0.200251	0.264997	0.116829	0.221132	0.142398	0.242753	0.068421	0.226595	0.219599	0.227254	0.254106	0.085499	0.257279	0.24995	0.214019	0.086104		0.0306915	0.030692	0.030692	0.0596184	0.027068	0.0482914	0.0311419		0.057521	0.0634925	0.032789	0.0330482	0.050055	0.0318404	0.027603
700	46.6667	0.180725	0.218767	0.198519	0.26453	0.131503	0.216799	0.148454	0.249154	0.056428	0.203898	0.218856	0.232289	0.245666	0.083063	0.259309	0.234818	0.244012	0.11851		0.0363327	0.036333	0.036333	0.0489842	0.031191	0.0508858	0.0354871		0.051468	0.0694036	0.032447	0.0412006	0.043317	0.0367244	0.02311
701	46.7333	0.180649	0.227731	0.214901	0.26654	0.108776	0.219024	0.143055	0.255731	0.069437	0.199726	0.209352	0.227382	0.246506	0.08055	0.254347	0.238863	0.243734	0.096007		0.0346366	0.034637	0.034637	0.0585712	0.030752	0.0478973	0.0284268		0.054485	0.0668674	0.027879	0.0599189	0.049156	0.0325758	0.031159
702	46.8	0.185932	0.220114	0.210794	0.266542	0.097646	0.212019	0.137794	0.259495	0.078151	0.218896	0.20797	0.234333	0.243051	0.073786	0.246106	0.229023	0.24568	0.089984		0.0336027	0.033603	0.033603	0.051885	0.029246	0.0460758	0.0315385		0.057671	0.0562735	0.024981	0.0486084	0.048911	0.0345415	0.022032
703	46.8667	0.165634	0.215477	0.213368	0.267821	0.085773	0.205207	0.140061	0.24935	0.062016	0.220638	0.215692	0.22967	0.255501	0.083872	0.253894	0.233353	0.235246	0.076659		0.0295276	0.029528	0.029528	0.0498628	0.027347	0.04616	0.0271533		0.08662	0.0736266	0.026365	0.0416303	0.044289	0.0324519	0.025131
704	46.9333	0.16129	0.233442	0.210159	0.272026	0.111266	0.200609	0.148915	0.261803	0.082516	0.227742	0.215281	0.229137	0.252824	0.082645	0.232111	0.221251	0.23558	0.109978		0.0333766	0.033377	0.033377	0.0557081	0.032463	0.042267	0.0242852		0.057532	0.0524788	0.030775	0.0344643	0.054675	0.0309955	0.022879
705	47	0.17315	0.230184	0.213589	0.271124	0.064731	0.21194	0.147349	0.262782	0.095259	0.232106	0.210526	0.233923	0.220746	0.100924	0.223802	0.225119	0.237872	0.067068		0.0314081	0.031408	0.031408	0.0559715	0.030648	0.0460529	0.0317036		0.048706	0.0787523	0.028688	0.0300207	0.056686	0.0318321	0.021008
706	47.0667	0.170957	0.223289	0.219418	0.277287	0.06812	0.217102	0.144723	0.259914	0.090851	0.240578	0.222174	0.225809	0.230816	0.095377	0.226541	0.218472	0.233834	0.093838		0.027865	0.027865	0.027865	0.051425	0.029648	0.0430566	0.0272852		0.089778	0.0747495	0.021576	0.0337184	0.058422	0.0336101	0.027038
707	47.1333	0.170214	0.225887	0.220166	0.26093	0.038631	0.206295	0.133111	0.258	0.096212	0.236588	0.220597	0.229352	0.194747	0.101057	0.226978	0.217922	0.23914	0.088005		0.0302403	0.03024	0.03024	0.0531956	0.032393	0.0416336	0.0260284		0.067185	0.0742516	0.027697	0.0338628	0.049406	0.0312274	0.02665
708	47.2	0.179048	0.228705	0.212848	0.254926	0.066165	0.209618	0.137512	0.262652	0.110269	0.228947	0.220844	0.210344	0.216663	0.108608	0.252108	0.214119	0.254924	0.101963		0.0339637	0.033964	0.033964	0.0535278	0.057024	0.0411899	0.0272586		0.069038	0.0778133	0.028041	0.0480285	0.053216	0.0292285	0.023111
709	47.2667	0.175533	0.221886	0.223125	0.238757	0.070525	0.202564	0.131238	0.25138	0.105889	0.232932	0.220255	0.216728	0.242989	0.106483	0.228738	0.220965	0.249872	0.060887		0.0314666	0.031467	0.031467	0.054732	0.038251	0.0398124	0.025974		0.085919	0.0636558	0.029137	0.0381944	0.050349	0.0295615	0.024917
710	47.3333	0.185141	0.229282	0.219453	0.239889	0.025767	0.220504	0.137745	0.237011	0.109325	0.213768	0.23182	0.212544	0.229011	0.092324	0.284141	0.209037	0.257541	0.121625		0.0247046	0.024705	0.024705	0.0572193	0.039708	0.0388715	0.0268065		0.0859	0.0556494	0.025826	0.0290827	0.056099	0.0247189	0.021739
711	47.4	0.1756	0.228416	0.222731	0.236318	0.04015	0.216345	0.118896	0.261019	0.090407	0.220809	0.22798	0.204843	0.224719	0.09488	0.283923	0.217774	0.242788	0.09853		0.0300871	0.030087	0.030087	0.0540225	0.037558	0.0409134	0.0243424		0.074621	0.0689733	0.027233	0.0345461	0.05061	0.025591	0.029946
712	47.4667	0.178065	0.230501	0.217968	0.238028	0.020303	0.219359	0.138824	0.256964	0.103203	0.207708	0.228543	0.206322	0.228148	0.102666	0.252936	0.212686	0.239351	0.145086		0.032925	0.032925	0.032925	0.0618266	0.043466	0.0399683	0.0261803		0.086774	0.0607496	0.03496	0.0473062	0.052346	0.0251819	0.019009
713	47.5333	0.176191	0.224248	0.220168	0.225138	0.046591	0.229514	0.12928	0.256766	0.090046	0.218364	0.224706	0.192522	0.224564	0.09337	0.238349	0.211801	0.246388	0.081378		0.033604	0.033604	0.033604	0.0549235	0.031976	0.0344828	0.0277171		0.072549	0.0444945	0.023819	0.0456476	0.050377	0.0279191	0.021089
714	47.6	0.178468	0.227681	0.220941	0.242908	0.086646	0.228048	0.134874	0.251821	0.093068	0.214035	0.22984	0.205387	0.162997	0.094921	0.241641	0.219351	0.246634	0.09422		0.035686	0.035686	0.035686	0.0580014	0.04216	0.0419207	0.0294779		0.071015	0.0620831	0.029429	0.0469962	0.05682	0.0297068	0.023551
715	47.6667	0.182516	0.223676	0.218386	0.246361	0.087705	0.229635	0.117613	0.254671	0.09957	0.227965	0.230775	0.197333	0.206162	0.083543	0.236829	0.22107	0.254218	0.065395		0.0343364	0.034336	0.034336	0.0526756	0.048931	0.0408518	0.0289966		0.063927	0.0679941	0.029508	0.0504132	0.049826	0.0265564	0.020841
716	47.7333	0.180389	0.215396	0.221572	0.230798	0.071141	0.250832	0.126158	0.257081	0.095306	0.215767	0.236122	0.18509	0.184952	0.095501	0.235366	0.224956	0.246212	0.079		0.0323563	0.032356	0.032356	0.0472563	0.050076	0.0402277	0.0269542		0.083116	0.0515196	0.024662	0.0611247	0.049599	0.0286043	0.017465
717	47.8	0.177667	0.208877	0.224733	0.209799	0.091352	0.254782	0.126277	0.253212	0.08382	0.220103	0.2481	0.182686	0.177026	0.095269	0.226789	0.228105	0.244107	0.072287		0.0275019	0.027502	0.027502	0.0513881	0.047601	0.0384279	0.0274322		0.068913	0.0579029	0.029297	0.0506722	0.057888	0.0288693	0.021926
718	47.8667	0.177081	0.217683	0.222519	0.221344	0.064331	0.265222	0.136644	0.258883	0.087726	0.206531	0.239702	0.180689	0.202524	0.088806	0.2114	0.237832	0.247815	0.072075		0.031745	0.031745	0.031745	0.0476508	0.050994	0.0387716	0.024203		0.069058	0.0582876	0.030755	0.0527778	0.046212	0.0311566	0.020254
719	47.9333	0.186943	0.208372	0.223276	0.2167	0.085787	0.265847	0.134837	0.267388	0.090686	0.212526	0.248512	0.17799	0.193044	0.102601	0.239229	0.237066	0.251565	0.076194		0.030137	0.030137	0.030137	0.051134	0.047868	0.0403919	0.0237537		0.076433	0.0646133	0.021915	0.0417847	0.051405	0.0297296	0.022798
720	48	0.175657	0.216942	0.223348	0.209154	0.102003	0.272652	0.130523	0.276237	0.107816	0.22039	0.253719	0.17733	0.179612	0.084124	0.238874	0.230477	0.225313	0.119106		0.0261595	0.02616	0.02616	0.0504394	0.045654	0.0424043	0.0247757		0.085756	0.0763371	0.046072	0.0303359	0.05571	0.0311284	0.020275
721	48.0667	0.185852	0.219466	0.221852	0.233809	0.046772	0.281927	0.137554	0.276924	0.082443	0.230374	0.252723	0.177586	0.170366	0.081115	0.2394	0.237697	0.23942	0.07858		0.0302045	0.030205	0.030205	0.0519236	0.040014	0.0430399	0.0261254		0.089042	0.0723037	0.021174	0.0343802	0.060499	0.0320017	0.019087
722	48.1333	0.184311	0.217472	0.222456	0.241291	0.033076	0.256824	0.132562	0.271721	0.076807	0.229212	0.263828	0.181118	0.158606	0.07435	0.2313	0.231548	0.240424	0.107264		0.0308048	0.030805	0.030805	0.0498177	0.051253	0.0458271	0.030362		0.088499	0.0959467	0.019592	0.0481089	0.058734	0.0319264	0.017375
723	48.2	0.179894	0.211979	0.227763	0.244506	0.131238	0.251966	0.144595	0.266575	0.086283	0.218421	0.259368	0.163329	0.170394	0.087224	0.23188	0.230365	0.256818	0.099217		0.0297031	0.029703	0.029703	0.0488791	0.042378	0.0465394	0.0252337		0.107288	0.130793	0.03119	0.0415191	0.04576	0.0312939	0.01979
724	48.2667	0.176046	0.209256	0.2236	0.24435	0.105094	0.245741	0.149227	0.259097	0.09725	0.227996	0.255769	0.170327	0.224984	0.103584	0.221561	0.222439	0.227482	0.078268		0.0386196	0.03862	0.03862	0.0502266	0.046252	0.0440957	0.0246479		0.103762	0.0866875	0.026264	0.0321195	0.052716	0.031842	0.019459
725	48.3333	0.181621	0.204368	0.220641	0.23383	0.127691	0.24634	0.163524	0.25185	0.083562	0.233208	0.250876	0.158929	0.223508	0.09643	0.242294	0.222746	0.220297	0.080294		0.0288899	0.02889	0.02889	0.0445982	0.045731	0.0460806	0.0239458		0.079812	0.0903034	0.024466	0.0291629	0.050246	0.0294172	0.017713
726	48.4	0.181421	0.198114	0.217606	0.245868	0.097617	0.238268	0.164307	0.238896	0.094233	0.220531	0.246416	0.169384	0.235263	0.091495	0.219989	0.221685	0.207161	0.124213		0.0340169	0.034017	0.034017	0.0452974	0.04511	0.0480742	0.0262546		0.067095	0.110296	0.028945	0.0366453	0.052138	0.0341738	0.014284
727	48.4667	0.181329	0.209633	0.227963	0.249693	0.056677	0.23792	0.166872	0.237619	0.097582	0.213418	0.236486	0.161742	0.18128	0.096206	0.238932	0.221039	0.221202	0.108097		0.0282997	0.0283	0.0283	0.0493066	0.045198	0.0450295	0.0231214		0.101115	0.114533	0.027774	0.0498063	0.047135	0.0364921	0.022914
728	48.5333	0.176866	0.206206	0.222952	0.256369	0.082267	0.236939	0.160466	0.235503	0.088764	0.206197	0.236045	0.185202	0.187428	0.085634	0.229477	0.226815	0.232804	0.076535		0.0311786	0.031179	0.031179	0.044884	0.043097	0.0519754	0.0242852		0.084731	0.161238	0.026345	0.0308126	0.064106	0.0328201	0.024971
729	48.6	0.169758	0.202763	0.214153	0.238643	0.063649	0.236883	0.167534	0.24026	0.090652	0.190647	0.229889	0.184905	0.20777	0.098043	0.243087	0.219498	0.219698	0.097195		0.0309	0.0309	0.0309	0.0499704	0.040411	0.0448606	0.0222496		0.100273	0.0812096	0.037369	0.0380155	0.057965	0.0389481	0.018935
730	48.6667	0.174526	0.199562	0.210331	0.243524	0.099295	0.229051	0.167952	0.233135	0.09487	0.190096	0.232369	0.204689	0.211174	0.092748	0.238297	0.223633	0.218424	0.084076		0.0327859	0.032786	0.032786	0.0397991	0.038884	0.0478972	0.0246669		0.069788	0.13048	0.032446	0.0399153	0.056618	0.0391855	0.015385
731	48.7333	0.173623	0.207204	0.211768	0.241328	0.062278	0.225519	0.174573	0.235546	0.09024	0.192652	0.219598	0.195283	0.221804	0.093225	0.235959	0.214565	0.221315	0.082018		0.0309507	0.030951	0.030951	0.0488947	0.044449	0.0502328	0.0254491		0.098257	0.112951	0.031016	0.0408094	0.044674	0.0336069	0.019872
732	48.8	0.175389	0.214328	0.216636	0.252484	0.08032	0.217919	0.170495	0.219535	0.095157	0.203571	0.223031	0.199173	0.228828	0.088692	0.248442	0.216952	0.214962	0.087084		0.0306089	0.030609	0.030609	0.0547053	0.043242	0.0528533	0.0196588		0.113292	0.101674	0.03342	0.051348	0.049421	0.0328779	0.023471
733	48.8667	0.154451	0.195177	0.203164	0.257668	0.082453	0.229625	0.158738	0.226882	0.090453	0.213523	0.206418	0.20931	0.224774	0.099966	0.243477	0.223333	0.215233	0.098273		0.028838	0.028838	0.028838	0.0479259	0.043565	0.0503304	0.0254899		0.077659	0.108313	0.033313	0.0410042	0.050633	0.0215771	0.022498
734	48.9333	0.157054	0.196723	0.189267	0.240157	0.089494	0.223553	0.162413	0.233879	0.092308	0.221295	0.198671	0.216353	0.221244	0.106637	0.241987	0.219304	0.209192	0.07709		0.0284414	0.028441	0.028441	0.0515904	0.043373	0.0475952	0.0239521		0.097369	0.110665	0.045436	0.0574103	0.04697	0.0346381	0.017568
735	49	0.157331	0.183319	0.172031	0.237492	0.127007	0.218333	0.135153	0.242847	0.097087	0.217391	0.208844	0.21383	0.210677	0.104844	0.228106	0.216474	0.212515	0.099271		0.0288252	0.028825	0.028825	0.0570839	0.043586	0.0468214	0.0216822		0.090563	0.117227	0.032799	0.0420321	0.048566	0.0200044	0.021542
736	49.0667	0.164654	0.178594	0.194182	0.238322	0.134697	0.220798	0.175376	0.253667	0.099244	0.22541	0.201273	0.211059	0.225443	0.090482	0.222461	0.215779	0.189536	0.13352		0.0297757	0.029776	0.029776	0.0608484	0.046154	0.0466091	0.0235083		0.131146	0.0441679	0.028257	0.0453758	0.053355	0.020008	0.020548
737	49.1333	0.163596	0.177111	0.191528	0.255994	0.129525	0.222896	0.16539	0.262392	0.102718	0.230564	0.194631	0.223075	0.219697	0.101658	0.228084	0.213283	0.19429	0.059425		0.0325488	0.032549	0.032549	0.0513494	0.036977	0.0446354	0.0252119		0.081102	0.070587	0.031153	0.0476037	0.051321	0.0234774	0.018748
738	49.2	0.166945	0.172805	0.178018	0.244841	0.133941	0.222942	0.159047	0.251192	0.070787	0.222584	0.184354	0.225745	0.224916	0.095704	0.226782	0.226633	0.203418	0.083814		0.0312989	0.031299	0.031299	0.0534262	0.045328	0.0459552	0.0224531		0.07794	0.06642	0.034063	0.050766	0.051498	0.0293708	0.022685
739	49.2667	0.159657	0.185964	0.189521	0.249968	0.076885	0.216506	0.1643	0.260645	0.112251	0.222863	0.18266	0.221405	0.219262	0.07955	0.221294	0.225923	0.18918	0.075532		0.0279962	0.027996	0.027996	0.0555564	0.043007	0.0454621	0.0259776		0.082402	0.0616578	0.028464	0.0465273	0.055731	0.0757639	0.021284
740	49.3333	0.157807	0.189487	0.185654	0.254826	0.099781	0.227154	0.161925	0.271035	0.097693	0.213321	0.182837	0.228595	0.225479	0.088248	0.200346	0.226217	0.189761	0.098534		0.0263468	0.026347	0.026347	0.0498208	0.041994	0.0413094	0.0211239		0.103842	0.054428	0.029753	0.0354988	0.050766	0.0737101	0.01945
741	49.4	0.152391	0.176398	0.196773	0.266926	0.092326	0.213085	0.163547	0.266423	0.09942	0.194577	0.189731	0.231517	0.220302	0.100074	0.207581	0.233611	0.222989	0.098119		0.0304197	0.03042	0.03042	0.0462915	0.045967	0.0384615	0.0246686		0.114571	0.0595982	0.031242	0.0324385	0.048089	0.0676819	0.021246
742	49.4667	0.167992	0.179718	0.192428	0.247932	0.077219	0.203594	0.167758	0.264306	0.102426	0.189092	0.192795	0.248152	0.202917	0.10407	0.222912	0.234491	0.214986	0.078001		0.0265531	0.026553	0.026553	0.0536513	0.047634	0.0434448	0.0244128		0.112635	0.0631963	0.02453	0.046061	0.052557	0.0706366	0.018382
743	49.5333	0.174983	0.184713	0.193238	0.251652	0.081046	0.204631	0.17442	0.257432	0.108047	0.203548	0.186748	0.252684	0.212061	0.09781	0.197037	0.214046	0.205541	0.073548		0.0275087	0.027509	0.027509	0.0440213	0.044073	0.0418158	0.0297447		0.093006	0.043488	0.031939	0.0431909	0.047563	0.0602858	0.020792
744	49.6	0.163112	0.178702	0.198753	0.255607	0.150124	0.203207	0.164343	0.261385	0.10033	0.200682	0.199611	0.246241	0.225824	0.098672	0.190709	0.225325	0.227392	0.092122		0.0297841	0.029784	0.029784	0.0603912	0.04384	0.0383528	0.02907		0.098306	0.0603703	0.032738	0.0384011	0.04847	0.0466151	0.023331
745	49.6667	0.172105	0.199959	0.203381	0.262812	0.127434	0.198793	0.173501	0.269146	0.11301	0.192761	0.200803	0.252178	0.208174	0.105396	0.166965	0.226443	0.215106	0.086581		0.0302348	0.030235	0.030235	0.0622539	0.034116	0.0410749	0.029386		0.082147	0.0528432	0.020747	0.050421	0.042477	0.0478766	0.017709
746	49.7333	0.181931	0.196115	0.199743	0.262283	0.090839	0.202744	0.169593	0.257673	0.085953	0.195815	0.197215	0.256445	0.229107	0.106654	0.203231	0.234839	0.212861	0.094506		0.0287282	0.028728	0.028728	0.0611098	0.040286	0.0387765	0.0278704		0.098046	0.0513556	0.033957	0.0494608	0.04401	0.047784	0.025731
747	49.8	0.174381	0.197272	0.197321	0.25653	0.0892	0.197084	0.166828	0.263788	0.080418	0.194662	0.206422	0.263314	0.220914	0.120375	0.198819	0.23119	0.220759	0.111117		0.0320435	0.032044	0.032044	0.0573679	0.037939	0.0391503	0.0258359		0.089897	0.0490366	0.028847	0.046613	0.052185	0.0408618	0.026667
748	49.8667	0.178326	0.201901	0.196157	0.251555	0.126257	0.18213	0.171508	0.270314	0.085997	0.211525	0.20065	0.263498	0.228326	0.110135	0.267375	0.225084	0.209764	0.09749		0.028328	0.028328	0.028328	0.051422	0.039481	0.0399708	0.0327274		0.102136	0.0611036	0.031881	0.0337906	0.045097	0.0404978	0.016345
749	49.9333	0.174395	0.212129	0.163175	0.267329	0.077768	0.198374	0.166191	0.279935	0.107879	0.238842	0.197187	0.254797	0.217888	0.106025	0.282721	0.228814	0.22263	0.114935		0.0273245	0.027325	0.027325	0.0608397	0.039665	0.0380687	0.0282797		0.078042	0.0423706	0.028926	0.0190868	0.049142	0.0448959	0.022463
750	50	0.183258	0.198868	0.12526	0.26788	0.083591	0.190755	0.172976	0.26797	0.087269	0.243062	0.197917	0.259535	0.219685	0.123989	0.208833	0.235238	0.228874	0.09209		0.0277564	0.027756	0.027756	0.058096	0.031751	0.0425386	0.0294785		0.11911	0.0628508	0.03472	0.0240575	0.047746	0.0454077	0.021113
751	50.0667	0.176661	0.208639	0.168501	0.26454	0.079181	0.186671	0.164281	0.276385	0.107799	0.230868	0.192355	0.258681	0.234528	0.117428	0.204002	0.229207	0.242798	0.088199		0.0246628	0.024663	0.024663	0.0566088	0.04321	0.0416986	0.0320256		0.110828	0.0442353	0.028205	0.0240125	0.05128	0.0384762	0.025101
752	50.1333	0.184885	0.203448	0.205211	0.273009	0.123651	0.181398	0.167926	0.270617	0.088672	0.228214	0.185956	0.269907	0.21418	0.105376	0.220134	0.227841	0.231661	0.103394		0.0228771	0.022877	0.022877	0.059117	0.036536	0.0442014	0.0348593		0.108075	0.0427029	0.03019	0.0270021	0.052357	0.0393467	0.023746
753	50.2	0.175447	0.212749	0.206355	0.26307	0.073442	0.205908	0.162577	0.258381	0.086456	0.228364	0.18717	0.262061	0.227214	0.099734	0.226547	0.233139	0.224488	0.093032		0.0245493	0.024549	0.024549	0.0573036	0.037354	0.0436704	0.0328947		0.105928	0.0426057	0.026552	0.0407372	0.053475	0.0374544	0.020134
754	50.2667	0.186277	0.216365	0.201206	0.267232	0.132458	0.217156	0.156245	0.230155	0.088812	0.220305	0.188516	0.263892	0.236757	0.100745	0.222585	0.217344	0.223669	0.112234		0.028594	0.028594	0.028594	0.0545877	0.029891	0.0444487	0.026199		0.099157	0.0515195	0.03468	0.0315385	0.044547	0.0347891	0.015064
755	50.3333	0.189894	0.216051	0.201657	0.262618	0.121868	0.224836	0.153066	0.243632	0.101449	0.210962	0.193684	0.269013	0.255835	0.108632	0.215605	0.211932	0.226121	0.112007		0.0246492	0.024649	0.024649	0.0523771	0.035542	0.0452909	0.027972		0.104651	0.0584198	0.026688	0.049232	0.042054	0.0399575	0.021176
756	50.4	0.197324	0.21155	0.177883	0.254211	0.09754	0.227685	0.152702	0.228785	0.089819	0.218138	0.202384	0.269729	0.255649	0.104964	0.228362	0.212593	0.224708	0.076946		0.0243619	0.024362	0.024362	0.0535977	0.032761	0.0481405	0.0306967		0.093969	0.0378607	0.031213	0.0435863	0.048248	0.0407726	0.02522
757	50.4667	0.202018	0.208907	0.197098	0.267034	0.143523	0.229039	0.146427	0.277328	0.089694	0.225328	0.207261	0.269501	0.258529	0.090799	0.21527	0.21585	0.237975	0.074452		0.0290758	0.029076	0.029076	0.0561488	0.03739	0.0505875	0.0290248		0.105935	0.057092	0.036732	0.0453026	0.044714	0.0361697	0.019448
758	50.5333	0.195395	0.199059	0.193984	0.257064	0.16287	0.257885	0.139316	0.280536	0.090653	0.221117	0.215469	0.229955	0.274475	0.106043	0.20579	0.229444	0.259572	0.099061		0.029271	0.029271	0.029271	0.0561883	0.033612	0.0462702	0.0261878		0.098065	0.0488396	0.028149	0.0428077	0.041369	0.0373552	0.020812
759	50.6	0.21124	0.200411	0.200074	0.263534	0.068525	0.262475	0.14091	0.278631	0.085431	0.211199	0.21133	0.252666	0.267239	0.086137	0.240355	0.216342	0.270972	0.133602		0.0275905	0.027591	0.027591	0.0510243	0.039974	0.045276	0.0255786		0.095542	0.0525405	0.023062	0.0440763	0.038436	0.0397562	0.019569
760	50.6667	0.203944	0.194823	0.193393	0.255598	0.03356	0.260762	0.142182	0.281706	0.106516	0.228482	0.214706	0.279574	0.273221	0.090734	0.207262	0.206423	0.254165	0.05581		0.0314115	0.031412	0.031412	0.0485415	0.032889	0.0488646	0.0277992		0.081092	0.0551559	0.035595	0.0514767	0.045313	0.035444	0.017003
761	50.7333	0.202605	0.19398	0.200186	0.262161	0.095454	0.258677	0.136596	0.293325	0.070603	0.229953	0.214907	0.285621	0.27382	0.090624	0.218803	0.21817	0.256834	0.087688		0.0266556	0.026656	0.026656	0.0576415	0.032258	0.0476378	0.0243619		0.095238	0.0558641	0.029918	0.057147	0.043227	0.0379594	0.016097
762	50.8	0.196872	0.18595	0.202703	0.258226	0.030845	0.251418	0.125629	0.282155	0.081791	0.241245	0.210339	0.285196	0.273235	0.088806	0.205442	0.218203	0.267228	0.102024		0.0287026	0.028703	0.028703	0.0621802	0.036031	0.053013	0.0275211		0.074927	0.0457415	0.021755	0.0327869	0.039881	0.035272	0.016467
763	50.8667	0.199613	0.184156	0.194454	0.26067	0.028986	0.25443	0.125323	0.273349	0.097157	0.24231	0.212744	0.279517	0.263729	0.102878	0.214816	0.209199	0.235316	0.095443		0.0283937	0.028394	0.028394	0.0498136	0.036958	0.0515004	0.0268839		0.052224	0.0484475	0.022962	0.0302511	0.049728	0.0413476	0.021318
764	50.9333	0.191418	0.186655	0.214432	0.263873	0.05432	0.231396	0.122015	0.279848	0.091446	0.220784	0.21014	0.290927	0.259452	0.08972	0.219766	0.209374	0.242994	0.108926		0.0256916	0.025692	0.025692	0.0522673	0.032541	0.0518529	0.0270478		0.065133	0.0594988	0.03332	0.0456853	0.048872	0.0385129	0.014378
765	51	0.188199	0.187255	0.221925	0.261263	0.086735	0.232177	0.122602	0.261271	0.099449	0.22011	0.212043	0.272566	0.249189	0.090439	0.249777	0.213197	0.234491	0.115529		0.0278914	0.027891	0.027891	0.0549279	0.037022	0.0498944	0.0241935		0.09166	0.0626271	0.029257	0.0545858	0.048307	0.0377498	0.013658
766	51.0667	0.171002	0.177801	0.234057	0.256983	0.041963	0.226316	0.120813	0.272269	0.08576	0.217353	0.212457	0.270978	0.255669	0.085548	0.229208	0.199424	0.243562	0.126669		0.0286026	0.028603	0.028603	0.0557761	0.035591	0.0512821	0.0223421		0.082945	0.0745824	0.031353	0.0336948	0.037367	0.0344632	0.015699
767	51.1333	0.158525	0.181744	0.231227	0.256708	0.065421	0.220091	0.136562	0.258745	0.087756	0.198498	0.215381	0.272309	0.262953	0.089497	0.223549	0.209125	0.236926	0.095289		0.0274493	0.027449	0.027449	0.0581086	0.04748	0.0505443	0.0217736		0.081532	0.0495567	0.027918	0.0433276	0.03888	0.0419367	0.022744
768	51.2	0.166546	0.176214	0.235115	0.252758	0.052638	0.217588	0.133423	0.265877	0.082538	0.20942	0.218515	0.258405	0.27028	0.1036	0.222912	0.200729	0.250773	0.10588		0.0274617	0.027462	0.027462	0.0592051	0.035077	0.0488183	0.0202622		0.061692	0.0570005	0.034202	0.0329163	0.041549	0.0440938	0.018675
769	51.2667	0.165372	0.187435	0.238552	0.25229	0.041382	0.214876	0.139122	0.255988	0.101037	0.227325	0.216283	0.265422	0.262217	0.098652	0.234355	0.215237	0.248381	0.089996		0.0273558	0.027356	0.027356	0.0474369	0.038403	0.0543772	0.0265465		0.076086	0.0742928	0.028355	0.023709	0.041651	0.0497747	0.017564
770	51.3333	0.160645	0.180383	0.247042	0.25822	0.055586	0.203605	0.132729	0.247141	0.098775	0.245316	0.220879	0.259677	0.257998	0.103825	0.230509	0.220549	0.244647	0.169389		0.0244368	0.024437	0.024437	0.061207	0.032361	0.05547	0.0276372		0.088915	0.0614227	0.03607	0.03318	0.047027	0.0498849	0.020078
771	51.4	0.141299	0.187295	0.22895	0.254348	0.096014	0.199944	0.122439	0.252246	0.100257	0.235311	0.228862	0.256068	0.238559	0.105776	0.225742	0.219673	0.244488	0.111485		0.0255374	0.025537	0.025537	0.0477539	0.049119	0.0519373	0.0235571		0.073777	0.0562172	0.027865	0.0564007	0.050899	0.0579463	0.018155
772	51.4667	0.147052	0.177399	0.204309	0.257315	0.057166	0.202649	0.123024	0.243971	0.083118	0.241218	0.235079	0.259374	0.249182	0.096719	0.238952	0.219395	0.256136	0.104778		0.0232108	0.023211	0.023211	0.0475263	0.035554	0.0484923	0.0254586		0.075295	0.0636407	0.031316	0.0575	0.047261	0.0562279	0.016935
773	51.5333	0.150614	0.17946	0.212957	0.259485	0.061944	0.201356	0.11704	0.252827	0.094834	0.234976	0.234422	0.254018	0.191271	0.099602	0.244015	0.223081	0.252991	0.104515		0.0318394	0.031839	0.031839	0.0429942	0.030376	0.053937	0.0266617		0.069055	0.0549733	0.028061	0.0600748	0.054746	0.0518104	0.016065
774	51.6	0.15	0.169357	0.222486	0.240562	0.06948	0.215879	0.120761	0.257382	0.090488	0.239851	0.235874	0.271372	0.180667	0.10087	0.247203	0.226626	0.252453	0.088779		0.0308597	0.03086	0.03086	0.0463829	0.03182	0.0494644	0.0237184		0.071128	0.0783808	0.021497	0.0685254	0.059918	0.0686544	0.018666
775	51.6667	0.152179	0.160937	0.217281	0.257537	0.078388	0.218086	0.124299	0.25947	0.075723	0.218937	0.227819	0.262682	0.181604	0.104507	0.235363	0.24818	0.258331	0.130836		0.0261194	0.026119	0.026119	0.0508721	0.031169	0.0470085	0.0227003		0.082173	0.0582734	0.028002	0.0478186	0.05451	0.0642973	0.019838
776	51.7333	0.154347	0.166445	0.239711	0.251652	0.081085	0.211747	0.129303	0.261619	0.103661	0.218182	0.232717	0.265025	0.192076	0.112768	0.237541	0.257524	0.251982	0.10003		0.0289464	0.028946	0.028946	0.0421846	0.043851	0.0477855	0.0271783		0.094408	0.0804903	0.037197	0.044604	0.057026	0.0683649	0.027648
777	51.8	0.15051	0.161464	0.206897	0.246842	0.082512	0.209786	0.122818	0.256081	0.099913	0.21764	0.245514	0.255895	0.200327	0.123397	0.248448	0.2566	0.258196	0.091618		0.0237219	0.023722	0.023722	0.0497793	0.032346	0.0494782	0.0258545		0.060259	0.0777265	0.029923	0.0443714	0.057409	0.0747664	0.023792
778	51.8667	0.146255	0.16138	0.221477	0.244798	0.134522	0.203179	0.123707	0.266918	0.097976	0.216447	0.248837	0.239277	0.227142	0.10298	0.240224	0.219673	0.245303	0.127611		0.0332104	0.03321	0.03321	0.045	0.043235	0.049142	0.026212		0.053204	0.0625679	0.027704	0.0475527	0.064469	0.0748002	0.023979
779	51.9333	0.146613	0.154895	0.218822	0.233701	0.118375	0.200091	0.117772	0.257387	0.098218	0.222012	0.253928	0.258995	0.2291	0.104738	0.252713	0.256101	0.253797	0.128207		0.0286162	0.028616	0.028616	0.0468053	0.033386	0.0468938	0.0281239		0.056836	0.0538375	0.031942	0.0441096	0.057169	0.0772443	0.024945
780	52	0.152007	0.156716	0.204835	0.236562	0.072391	0.199532	0.117571	0.257256	0.103605	0.211317	0.254902	0.244815	0.238338	0.109948	0.245524	0.24845	0.247664	0.098647		0.0204335	0.020434	0.020434	0.0438029	0.041208	0.0412898	0.0269654		0.062188	0.0636778	0.03384	0.0247678	0.059072	0.0640944	0.026807
781	52.0667	0.150921	0.170758	0.200655	0.246024	0.079143	0.20103	0.129142	0.266773	0.113847	0.209775	0.244257	0.235134	0.249789	0.108419	0.230498	0.235619	0.257709	0.128314		0.032208	0.032208	0.032208	0.0488811	0.031991	0.0478767	0.0290672		0.063324	0.0683421	0.030973	0.0369942	0.055291	0.062208	0.02456
782	52.1333	0.147707	0.160234	0.201713	0.25433	0.140913	0.204833	0.126416	0.26476	0.11928	0.207773	0.248643	0.239995	0.227628	0.087051	0.231879	0.239536	0.260293	0.072616		0.0240124	0.024012	0.024012	0.0438901	0.03649	0.0498192	0.0258458		0.080204	0.053792	0.033286	0.0237511	0.055135	0.0693598	0.031155
783	52.2	0.153228	0.161449	0.194785	0.259249	0.115093	0.206154	0.125472	0.252421	0.105295	0.202221	0.245061	0.242836	0.226833	0.109476	0.243774	0.236239	0.259176	0.07921		0.026545	0.026545	0.026545	0.0446835	0.036745	0.0506378	0.0281077		0.094281	0.0528932	0.020345	0.0389267	0.055894	0.062596	0.021816
784	52.2667	0.156143	0.164252	0.196581	0.255144	0.0901	0.191547	0.119649	0.232342	0.111584	0.212231	0.248207	0.235306	0.248171	0.062877	0.246837	0.240519	0.264027	0.090164		0.028197	0.028197	0.028197	0.0475825	0.034231	0.0464057	0.0276519		0.056948	0.0680377	0.02631	0.0408517	0.056367	0.0569418	0.025116
785	52.3333	0.152852	0.156908	0.206403	0.251712	0.106318	0.199657	0.11835	0.240602	0.099964	0.221744	0.239654	0.241151	0.23878	0.079928	0.242919	0.231876	0.269747	0.077562		0.023705	0.023705	0.023705	0.0457187	0.032399	0.0491867	0.027611		0.054003	0.0608928	0.032167	0.0491739	0.054614	0.0630764	0.025505
786	52.4	0.153741	0.157432	0.198408	0.257755	0.081467	0.196535	0.121501	0.234049	0.111469	0.226242	0.233413	0.242352	0.244738	0.088075	0.237009	0.236161	0.269858	0.092578		0.0372257	0.037226	0.037226	0.0427184	0.03295	0.0462998	0.0310421		0.076278	0.0830544	0.033948	0.0517845	0.052233	0.0668728	0.031164
787	52.4667	0.148553	0.152259	0.200988	0.233898	0.087946	0.198101	0.124014	0.232377	0.109283	0.214925	0.218899	0.244188	0.241953	0.07382	0.249406	0.234121	0.255022	0.088131		0.0293564	0.029356	0.029356	0.0366916	0.035026	0.0415677	0.0266534		0.07042	0.0621562	0.032321	0.0542745	0.058006	0.0591346	0.027516
788	52.5333	0.155289	0.154862	0.192552	0.215955	0.058294	0.198065	0.116736	0.234009	0.102792	0.217796	0.205068	0.246432	0.257964	0.079528	0.239227	0.236813	0.269532	0.092761		0.0287507	0.028751	0.028751	0.0432812	0.030149	0.0404524	0.0248031		0.067273	0.0502659	0.027876	0.0358209	0.050752	0.0558549	0.023183
789	52.6	0.15706	0.158261	0.185965	0.212651	0.088179	0.205941	0.126874	0.237619	0.104892	0.239759	0.212242	0.246925	0.224326	0.087243	0.232551	0.240242	0.268228	0.091878		0.0247955	0.024796	0.024796	0.047742	0.034157	0.04121	0.0287527		0.063296	0.0671877	0.03222	0.0641224	0.053751	0.0489537	0.026874
790	52.6667	0.151993	0.162938	0.169573	0.196579	0.149164	0.191635	0.122584	0.251137	0.106768	0.240174	0.199372	0.245036	0.226445	0.088513	0.226342	0.236204	0.277582	0.084142		0.0258587	0.025859	0.025859	0.0458727	0.035508	0.0398838	0.02375		0.060939	0.0629674	0.033359	0.0337887	0.054988	0.0530364	0.02618
791	52.7333	0.147484	0.158773	0.18764	0.2155	0.095387	0.206568	0.123968	0.246143	0.10522	0.255514	0.207467	0.240482	0.227935	0.09017	0.221688	0.239695	0.254794	0.073167		0.0270324	0.027032	0.027032	0.0464701	0.028474	0.0415211	0.0252465		0.073207	0.0641639	0.028974	0.0497183	0.048882	0.0451861	0.018328
792	52.8	0.145834	0.159436	0.183723	0.200847	0.079588	0.195641	0.128281	0.235605	0.111885	0.265109	0.197153	0.241887	0.224043	0.085168	0.222326	0.235512	0.265329	0.07981		0.0293069	0.029307	0.029307	0.0390447	0.035075	0.0387461	0.0242256		0.070331	0.0728662	0.031005	0.0415419	0.047267	0.042409	0.019933
793	52.8667	0.146745	0.158603	0.179055	0.230085	0.055886	0.209264	0.129275	0.22855	0.085235	0.284788	0.196736	0.240589	0.218044	0.075141	0.229039	0.237452	0.266575	0.063612		0.0321707	0.032171	0.032171	0.0444287	0.042169	0.0412495	0.022733		0.062544	0.0627348	0.041312	0.0532362	0.05161	0.0435933	0.027366
794	52.9333	0.144678	0.160781	0.181758	0.24211	0.062735	0.194902	0.14044	0.204113	0.09793	0.264982	0.198854	0.245797	0.227848	0.072845	0.23904	0.234979	0.265207	0.086748		0.0297757	0.029776	0.029776	0.0414528	0.038219	0.0411429	0.0265807		0.090526	0.0697243	0.031643	0.0302933	0.043879	0.0478227	0.028041
795	53	0.147472	0.162243	0.188993	0.237801	0.089054	0.203004	0.145792	0.225264	0.111344	0.242616	0.186907	0.245733	0.218631	0.087242	0.231387	0.256872	0.269285	0.065519		0.0283126	0.028313	0.028313	0.0419186	0.046922	0.0403477	0.0263952		0.110984	0.0649182	0.026813	0.0303865	0.054573	0.0454052	0.026142
796	53.0667	0.144937	0.168585	0.182539	0.243168	0.087283	0.205583	0.152027	0.21668	0.1064	0.200621	0.190861	0.237146	0.20288	0.085443	0.225303	0.256044	0.272605	0.085168		0.0323264	0.032326	0.032326	0.0396493	0.041897	0.0327562	0.0321118		0.099176	0.0659441	0.035655	0.0428023	0.052127	0.0446136	0.020136
797	53.1333	0.149547	0.166355	0.180055	0.251326	0.078541	0.185926	0.147006	0.225558	0.085675	0.202647	0.189578	0.2523	0.208797	0.091404	0.213896	0.244892	0.275892	0.067319		0.0329969	0.032997	0.032997	0.0439689	0.047884	0.0364943	0.0290867		0.089517	0.0543225	0.033866	0.043082	0.039939	0.0401935	0.019254
798	53.2	0.154665	0.159606	0.184701	0.24362	0.046474	0.184046	0.141705	0.24038	0.091389	0.197725	0.190553	0.256558	0.205437	0.085962	0.214737	0.251581	0.27144	0.055823		0.0373303	0.03733	0.03733	0.0413071	0.042691	0.0420969	0.0309045		0.107833	0.0698574	0.02838	0.0358957	0.045681	0.0407086	0.024575
799	53.2667	0.157679	0.162683	0.179223	0.25413	0.128909	0.18239	0.143279	0.241585	0.091877	0.203131	0.198288	0.253693	0.210428	0.089038	0.205784	0.239608	0.275322	0.084075		0.0345842	0.034584	0.034584	0.038084	0.043314	0.0329587	0.0304666		0.08739	0.0601769	0.036218	0.0413755	0.043795	0.0241379	0.022772
800	53.3333	0.161657	0.152436	0.178538	0.24641	0.14146	0.203255	0.143908	0.238682	0.073854	0.202899	0.196606	0.252273	0.195342	0.097363	0.215281	0.246481	0.266494	0.080618		0.0361492	0.036149	0.036149	0.038674	0.040091	0.0450059	0.0276046		0.091205	0.0686181	0.037153	0.0299708	0.018986	0.0259032	0.01932
801	53.4	0.16315	0.144615	0.183041	0.245314	0.119928	0.202477	0.147814	0.240052	0.10223	0.223313	0.20339	0.254123	0.204399	0.097945	0.196301	0.240723	0.263994	0.085964		0.0333988	0.033399	0.033399	0.0406512	0.041751	0.0476002	0.0300952		0.105013	0.0496135	0.026285	0.0302535	0.019151	0.0200308	0.017583
802	53.4667	0.159211	0.147103	0.174938	0.23143	0.101205	0.205314	0.13571	0.245817	0.091553	0.218945	0.202308	0.232696	0.200683	0.09175	0.202406	0.238855	0.265031	0.071741		0.0321169	0.032117	0.032117	0.0422866	0.036491	0.0462078	0.0305567		0.09986	0.0624427	0.02828	0.0474391	0.047619	0.0231689	0.016726
803	53.5333	0.160971	0.143588	0.170571	0.248428	0.087488	0.192639	0.148168	0.238587	0.089857	0.215909	0.197659	0.249489	0.199085	0.088454	0.213471	0.240561	0.277422	0.095321		0.0343119	0.034312	0.034312	0.0434419	0.032934	0.0505074	0.0226917		0.093559	0.0555832	0.030195	0.0550364	0.048803	0.0219187	0.01657
804	53.6	0.167841	0.137351	0.178335	0.252517	0.143643	0.202164	0.146422	0.246537	0.084307	0.214462	0.201675	0.246174	0.196965	0.0937	0.187158	0.225018	0.277837	0.085757		0.0320877	0.032088	0.032088	0.0454747	0.033454	0.0542399	0.0249387		0.093282	0.0675848	0.022578	0.0350664	0.05487	0.0263668	0.017728
805	53.6667	0.166948	0.138218	0.168561	0.23724	0.129768	0.204049	0.143828	0.242418	0.099358	0.233826	0.205932	0.244815	0.197827	0.109784	0.185739	0.228594	0.274006	0.127478		0.0315938	0.031594	0.031594	0.0400116	0.041905	0.0592373	0.0280189		0.080494	0.058619	0.025969	0.0544774	0.057012	0.0298555	0.021497
806	53.7333	0.162168	0.134919	0.168505	0.238803	0.133964	0.199964	0.123625	0.229844	0.091786	0.223171	0.210815	0.256296	0.193344	0.105347	0.18448	0.233672	0.287267	0.07387		0.0392157	0.039216	0.039216	0.0358355	0.036603	0.0560728	0.0236196		0.08599	0.059428	0.041313	0.0517457	0.047769	0.021806	0.019939
807	53.8	0.169473	0.13925	0.173662	0.246569	0.128425	0.216169	0.135936	0.233279	0.09766	0.218523	0.193559	0.255867	0.180989	0.091542	0.1737	0.223045	0.250991	0.109263		0.032221	0.032221	0.032221	0.0480167	0.038814	0.0458697	0.0216475		0.096537	0.0530111	0.033051	0.0530364	0.044701	0.0281054	0.025292
808	53.8667	0.171813	0.142262	0.168014	0.271814	0.114482	0.229099	0.125619	0.253923	0.084429	0.215347	0.189027	0.256594	0.187977	0.086453	0.188619	0.234408	0.269621	0.11433		0.0349892	0.034989	0.034989	0.0402263	0.043838	0.0434144	0.0262496		0.082751	0.0581657	0.037633	0.0418593	0.044847	0.0240331	0.017498
809	53.9333	0.17558	0.139875	0.174025	0.269779	0.15897	0.233687	0.123779	0.261416	0.067737	0.219812	0.199488	0.260753	0.186524	0.098356	0.184292	0.237007	0.271922	0.091377		0.0374269	0.037427	0.037427	0.0350734	0.040814	0.0438524	0.0276803		0.087124	0.0707297	0.034335	0.0521739	0.047297	0.0262626	0.020038
810	54	0.168213	0.138815	0.172262	0.256235	0.054258	0.225008	0.121651	0.246684	0.067373	0.217748	0.189341	0.25995	0.179309	0.077952	0.161613	0.221401	0.231545	0.109041		0.0298233	0.029823	0.029823	0.0370501	0.037048	0.0476856	0.021957		0.109529	0.043622	0.0292	0.0294906	0.047919	0.02605	0.017354
811	54.0667	0.166135	0.136324	0.172973	0.262253	0.092429	0.21902	0.127629	0.244329	0.071962	0.214434	0.180391	0.264357	0.190904	0.085749	0.17149	0.230503	0.24711	0.14214		0.0302804	0.03028	0.03028	0.0342798	0.040456	0.0439708	0.0261134		0.079251	0.0610506	0.034488	0.0415268	0.045076	0.0238804	0.02775
812	54.1333	0.157588	0.129494	0.177993	0.263735	0.077436	0.230554	0.12952	0.261031	0.075516	0.218468	0.185196	0.267837	0.182904	0.077529	0.165968	0.209139	0.250342	0.085586		0.0278307	0.027831	0.027831	0.0385633	0.036188	0.0463938	0.022231		0.084765	0.0553626	0.028302	0.0298632	0.045317	0.0255693	0.015404
813	54.2	0.156486	0.127756	0.180385	0.258955	0.084689	0.241245	0.122406	0.249473	0.084209	0.218059	0.180009	0.267349	0.188642	0.077586	0.155027	0.204043	0.252059	0.079325		0.0298508	0.029851	0.029851	0.0349325	0.04368	0.0441808	0.0228385		0.084123	0.0672576	0.024514	0.0636465	0.041652	0.0266137	0.024701
814	54.2667	0.147978	0.129002	0.181852	0.266761	0.044931	0.230173	0.120863	0.261223	0.072705	0.220135	0.180852	0.274383	0.189589	0.061656	0.160984	0.200044	0.226177	0.114664		0.0353535	0.035354	0.035354	0.0350058	0.03871	0.0520833	0.022934		0.071657	0.0715618	0.041999	0.07968	0.05524	0.0290409	0.023211
815	54.3333	0.15151	0.135492	0.189704	0.261924	0.048348	0.236995	0.133113	0.262349	0.085793	0.213872	0.172422	0.269073	0.184812	0.077624	0.17138	0.18935	0.237369	0.122415		0.0301342	0.030134	0.030134	0.0369004	0.041619	0.0470543	0.0216383		0.086242	0.0589938	0.035187	0.0261067	0.047324	0.0274221	0.017419
816	54.4	0.140377	0.128776	0.174263	0.260613	0.021201	0.263136	0.13404	0.271375	0.084719	0.209105	0.174588	0.280121	0.202544	0.0766	0.176321	0.198586	0.227898	0.095822		0.0366242	0.036624	0.036624	0.0354691	0.040441	0.0537223	0.0220631		0.086228	0.0589224	0.028244	0.0362426	0.052001	0.0276865	0.023265
817	54.4667	0.149425	0.130367	0.181689	0.255022	0.04059	0.243286	0.136205	0.266698	0.079691	0.216867	0.173443	0.282445	0.196814	0.075398	0.184539	0.193401	0.188749	0.135543		0.0324575	0.032458	0.032458	0.0394575	0.042454	0.0475263	0.0224034		0.082477	0.0606381	0.03357	0.058828	0.049127	0.0283497	0.026509
818	54.5333	0.150697	0.129032	0.184222	0.250321	0.04308	0.251814	0.133158	0.275643	0.071906	0.203941	0.177134	0.274344	0.194914	0.083162	0.192455	0.195921	0.187806	0.071902		0.0287642	0.028764	0.028764	0.0419492	0.034391	0.0534915	0.020222		0.071286	0.0488111	0.035912	0.0559322	0.050584	0.0312116	0.020658
819	54.6	0.152042	0.131521	0.179593	0.256216	0.034018	0.256609	0.138925	0.27283	0.053535	0.208867	0.179416	0.276773	0.192426	0.089694	0.177896	0.210293	0.201658	0.110144		0.0285714	0.028571	0.028571	0.042163	0.041857	0.0482705	0.0221479		0.062764	0.051566	0.032673	0.0534041	0.059395	0.0264913	0.022797
820	54.6667	0.152005	0.133825	0.180109	0.255002	0.04641	0.258442	0.139381	0.271933	0.057585	0.20476	0.173598	0.287924	0.194587	0.089192	0.196903	0.201957	0.200823	0.078124		0.0311677	0.031168	0.031168	0.0391506	0.042773	0.0525066	0.0155021		0.059584	0.0469057	0.030528	0.0437294	0.054023	0.0257782	0.023142
821	54.7333	0.14281	0.145568	0.181952	0.248394	0.068237	0.2661	0.148503	0.275683	0.068804	0.217206	0.180541	0.285634	0.185868	0.0913	0.183213	0.197539	0.205743	0.064085		0.0352201	0.03522	0.03522	0.0412574	0.042004	0.048317	0.0190073		0.078216	0.0605054	0.021574	0.0338843	0.063299	0.0286208	0.023331
822	54.8	0.151381	0.146604	0.178353	0.24841	0.112283	0.270015	0.150686	0.275868	0.048726	0.202824	0.178517	0.286885	0.189026	0.085258	0.186168	0.199385	0.18657	0.071699		0.0336273	0.033627	0.033627	0.0338785	0.038073	0.0483973	0.0235029		0.097458	0.0548378	0.02232	0.0555106	0.066971	0.0274874	0.020773
823	54.8667	0.150814	0.157731	0.184724	0.243569	0.029784	0.300066	0.152887	0.283321	0.052468	0.205296	0.180985	0.291426	0.203374	0.099158	0.200844	0.215045	0.199609	0.054598		0.0319231	0.031923	0.031923	0.0413094	0.040248	0.048934	0.0244122		0.107652	0.063138	0.030218	0.0375	0.060667	0.0278532	0.020793
824	54.9333	0.140763	0.160723	0.1849	0.240428	0.05223	0.270423	0.156447	0.287977	0.054825	0.207155	0.190561	0.284665	0.196725	0.09869	0.190704	0.207071	0.179465	0.059472		0.0399849	0.039985	0.039985	0.0427451	0.029812	0.0481325	0.0216886		0.086891	0.0493234	0.030756	0.0418282	0.057751	0.0242962	0.024045
825	55	0.145467	0.167318	0.199186	0.237731	0.050202	0.234308	0.169088	0.290681	0.059657	0.215804	0.193002	0.291605	0.192271	0.104437	0.210039	0.205891	0.194789	0.053857		0.0290794	0.029079	0.029079	0.0449943	0.042282	0.045419	0.0245855		0.097473	0.0509626	0.03445	0.0358309	0.064702	0.0280769	0.016936
826	55.0667	0.145647	0.158492	0.192996	0.22698	0.048789	0.244826	0.175685	0.280606	0.067599	0.219568	0.205458	0.288028	0.197858	0.106959	0.202514	0.219565	0.196744	0.071102		0.0325655	0.032566	0.032566	0.0353742	0.041159	0.0464527	0.0253708		0.072005	0.0589524	0.031214	0.0626731	0.068556	0.0299289	0.027695
827	55.1333	0.141385	0.168756	0.203416	0.232203	0.05096	0.235769	0.179411	0.289477	0.059142	0.218727	0.198755	0.281651	0.207572	0.122576	0.203137	0.222689	0.206515	0.049112		0.0314582	0.031458	0.031458	0.0359083	0.040129	0.0476929	0.0179031		0.068998	0.0545054	0.031053	0.03405	0.061487	0.0306694	0.023064
828	55.2	0.140217	0.167825	0.210217	0.235324	0.114523	0.242978	0.183793	0.281354	0.054588	0.209169	0.211704	0.291561	0.19973	0.106873	0.226566	0.219602	0.214148	0.085092		0.0307706	0.030771	0.030771	0.0455331	0.043152	0.0444893	0.0279553		0.074094	0.0473662	0.032121	0.0301109	0.059679	0.0287691	0.035728
829	55.2667	0.137847	0.15342	0.213958	0.22109	0.060267	0.25405	0.202425	0.289261	0.054548	0.20798	0.203995	0.285318	0.204324	0.111231	0.218507	0.223174	0.217955	0.10271		0.0311906	0.031191	0.031191	0.0471955	0.033174	0.0424794	0.0241198		0.082662	0.0613652	0.036581	0.0292512	0.051456	0.0284464	0.045161
830	55.3333	0.142132	0.158623	0.220802	0.220265	0.072437	0.232011	0.148694	0.275025	0.053081	0.213148	0.212025	0.288499	0.200013	0.110145	0.213701	0.223194	0.242043	0.125834		0.0348392	0.034839	0.034839	0.0434725	0.041734	0.0481061	0.0212682		0.085147	0.0568617	0.031187	0.0269849	0.051038	0.026422	0.068489
831	55.4	0.139683	0.158855	0.2187	0.225669	0.095986	0.253963	0.136499	0.26711	0.055366	0.211594	0.220464	0.290767	0.212927	0.103881	0.220733	0.226319	0.226753	0.099171		0.0369373	0.036937	0.036937	0.0488441	0.033455	0.0456822	0.0206944		0.075387	0.068262	0.034197	0.027357	0.053904	0.0276227	0.073174
832	55.4667	0.145283	0.155779	0.215939	0.222354	0.113873	0.249901	0.14544	0.270667	0.072716	0.205174	0.22638	0.245389	0.21705	0.105655	0.219022	0.217657	0.236603	0.116308		0.0402177	0.040218	0.040218	0.0585851	0.035463	0.0429902	0.0287602		0.078906	0.0679315	0.026748	0.0285847	0.054878	0.0331499	0.055018
833	55.5333	0.14108	0.1605	0.192671	0.231068	0.108069	0.234024	0.1516	0.268287	0.070366	0.205935	0.234292	0.23589	0.202462	0.100495	0.201685	0.222847	0.240802	0.10538		0.0369755	0.036976	0.036976	0.0484906	0.033509	0.0444269	0.0253171		0.099144	0.082319	0.038287	0.0364109	0.046697	0.0294215	0.058004
834	55.6	0.147283	0.159062	0.179341	0.223798	0.137048	0.237321	0.159145	0.273691	0.060784	0.202821	0.246674	0.25149	0.216102	0.087432	0.191639	0.234658	0.241817	0.07267		0.0365745	0.036575	0.036575	0.0477286	0.037648	0.0394678	0.0228188		0.084741	0.0624537	0.026637	0.034001	0.058238	0.0299029	0.061048
835	55.6667	0.137958	0.164826	0.184971	0.204235	0.076636	0.243442	0.157418	0.26438	0.058175	0.202537	0.244255	0.23819	0.204471	0.09627	0.196994	0.235758	0.246841	0.0603		0.0305344	0.030534	0.030534	0.0444863	0.040017	0.039244	0.024975		0.072917	0.0533029	0.035332	0.0543763	0.052948	0.0274118	0.073551
836	55.7333	0.138787	0.158589	0.18508	0.202056	0.118298	0.229227	0.173069	0.28578	0.062396	0.192565	0.247721	0.244968	0.21466	0.097597	0.195701	0.244098	0.239381	0.054713		0.0322205	0.032221	0.032221	0.0435823	0.045138	0.0462963	0.0282994		0.086716	0.0512536	0.029439	0.0433501	0.055397	0.0256648	0.058736
837	55.8	0.138905	0.161603	0.199945	0.203566	0.120523	0.267477	0.16319	0.276662	0.063736	0.199853	0.258033	0.252857	0.203474	0.090909	0.192484	0.241987	0.231021	0.109136		0.0343674	0.034367	0.034367	0.0545832	0.046908	0.0422213	0.0232558		0.057111	0.0529608	0.029757	0.0349335	0.057409	0.0233698	0.055603
838	55.8667	0.138765	0.154424	0.198279	0.193928	0.147113	0.272705	0.177988	0.268374	0.069067	0.187801	0.267026	0.255854	0.216148	0.090703	0.208851	0.245861	0.236264	0.063922		0.0275049	0.027505	0.027505	0.0468353	0.044564	0.040249	0.0248298		0.077525	0.0392917	0.030467	0.0414821	0.054137	0.0260279	0.043168
839	55.9333	0.137942	0.172629	0.196548	0.203597	0.040898	0.267927	0.182788	0.27605	0.059165	0.187671	0.25988	0.257821	0.203504	0.094871	0.187508	0.24605	0.236326	0.106218		0.0335437	0.033544	0.033544	0.0630527	0.04244	0.0418623	0.0323471		0.09074	0.0611915	0.030088	0.0595094	0.053686	0.0221818	0.049869
840	56	0.13977	0.175245	0.194172	0.204424	0.076771	0.254492	0.170488	0.268591	0.06913	0.177182	0.265485	0.257078	0.200892	0.086237	0.189193	0.243153	0.231565	0.072071		0.0393482	0.039348	0.039348	0.0544413	0.035013	0.0401747	0.0283851		0.104236	0.0846658	0.0298	0.054131	0.058801	0.0231675	0.021277
841	56.0667	0.133235	0.179293	0.200849	0.202914	0.150829	0.249202	0.169098	0.26138	0.063037	0.177024	0.269328	0.262966	0.18573	0.080774	0.161017	0.247727	0.230378	0.046521		0.0319826	0.031983	0.031983	0.0550816	0.029635	0.0429821	0.0292994		0.053209	0.0298775	0.032181	0.060869	0.05255	0.0223451	0.02323
842	56.1333	0.136711	0.182551	0.196981	0.206922	0.079385	0.249629	0.175028	0.254909	0.058105	0.177441	0.257151	0.260921	0.218415	0.08227	0.165666	0.24052	0.222935	0.052953		0.0344693	0.034469	0.034469	0.0476477	0.037141	0.0418296	0.0289453		0.0702	0.0595808	0.02593	0.0280628	0.05157	0.0236815	0.02232
843	56.2	0.135042	0.193655	0.191066	0.203612	0.110064	0.265312	0.182512	0.266064	0.055794	0.166661	0.260585	0.264263	0.205087	0.08246	0.157344	0.238095	0.23298	0.107022		0.0302256	0.030226	0.030226	0.0473256	0.039388	0.0389089	0.027822		0.044958	0.0584435	0.029978	0.0184958	0.061656	0.0251442	0.018619
844	56.2667	0.132999	0.193759	0.186271	0.205057	0.150334	0.25168	0.183516	0.265824	0.057312	0.191863	0.256926	0.268682	0.210886	0.066923	0.173601	0.240532	0.232107	0.095828		0.0333525	0.033353	0.033353	0.0511367	0.031458	0.0425781	0.0311392		0.078253	0.0788509	0.025256	0.0324656	0.058228	0.0265024	0.01845
845	56.3333	0.131598	0.206961	0.18915	0.196429	0.126487	0.227314	0.184871	0.263948	0.068316	0.173031	0.211655	0.267066	0.210723	0.072753	0.159916	0.231044	0.23947	0.055958		0.0365348	0.036535	0.036535	0.048659	0.030205	0.0466035	0.0292033		0.05417	0.0622805	0.035249	0.0344116	0.055543	0.0245621	0.026019
846	56.4	0.131124	0.208074	0.182986	0.188608	0.097417	0.253373	0.189299	0.264747	0.070631	0.164183	0.219347	0.282127	0.214022	0.0835	0.172822	0.239066	0.237285	0.117943		0.0318618	0.031862	0.031862	0.055597	0.035594	0.042237	0.0234871		0.061876	0.0422677	0.034826	0.0228518	0.062385	0.0244866	0.023874
847	56.4667	0.129657	0.198469	0.189213	0.196249	0.078689	0.242267	0.18312	0.275336	0.062104	0.180081	0.220639	0.268977	0.206585	0.084414	0.180318	0.240865	0.234632	0.054499		0.0327138	0.032714	0.032714	0.0611256	0.032077	0.0421133	0.0212836		0.075906	0.0915464	0.027433	0.0296593	0.05697	0.021322	0.022189
848	56.5333	0.123434	0.203074	0.186764	0.191311	0.113817	0.213726	0.179658	0.268767	0.062353	0.195346	0.202753	0.27058	0.215534	0.09098	0.181728	0.246697	0.232945	0.092152		0.0318634	0.031863	0.031863	0.055164	0.030139	0.0464767	0.0221631		0.033924	0.051227	0.03089	0.03158	0.066077	0.0252525	0.01901
849	56.6	0.123309	0.198895	0.184178	0.20462	0.090442	0.240161	0.188613	0.274114	0.053135	0.192136	0.191338	0.278966	0.211743	0.082832	0.208973	0.238847	0.237346	0.086866		0.03125	0.03125	0.03125	0.0782463	0.041816	0.0465252	0.0241505		0.062794	0.0391605	0.032603	0.0350088	0.056471	0.0277887	0.021966
850	56.6667	0.125689	0.201126	0.186706	0.198848	0.06908	0.213188	0.177158	0.268493	0.058106	0.197785	0.198475	0.270901	0.215331	0.098691	0.22057	0.255917	0.235116	0.108894		0.0340787	0.034079	0.034079	0.0667408	0.033555	0.0405142	0.0268908		0.067743	0.060443	0.030284	0.0405207	0.059562	0.0273711	0.014625
851	56.7333	0.127787	0.202531	0.179008	0.198693	0.126795	0.241675	0.189357	0.284348	0.054756	0.191999	0.209858	0.275984	0.20984	0.083884	0.22138	0.246616	0.255674	0.090374		0.0360154	0.036015	0.036015	0.0583333	0.030739	0.04358	0.0233498		0.048474	0.0642115	0.030311	0.0340661	0.052761	0.0256303	0.017674
852	56.8	0.120282	0.208271	0.182948	0.210134	0.101115	0.251568	0.191493	0.271336	0.055178	0.213709	0.206836	0.270478	0.204663	0.086989	0.235427	0.246392	0.240029	0.107341		0.0296553	0.029655	0.029655	0.0680327	0.041204	0.0449264	0.0256513		0.068372	0.0503912	0.038583	0.0428618	0.051605	0.0294394	0.024669
853	56.8667	0.129726	0.209321	0.190829	0.197361	0.134158	0.249473	0.182152	0.278097	0.057359	0.217035	0.201876	0.28366	0.210425	0.087188	0.227926	0.249753	0.242574	0.108088		0.0327495	0.03275	0.03275	0.0585242	0.03868	0.0438895	0.022754		0.052503	0.0552964	0.029828	0.0447525	0.053354	0.0301634	0.020408
854	56.9333	0.125408	0.203087	0.189341	0.198892	0.144737	0.240202	0.180845	0.281488	0.066996	0.230498	0.219465	0.269165	0.206533	0.0695	0.2321	0.251282	0.244587	0.100973		0.0340519	0.034052	0.034052	0.0655831	0.038115	0.048433	0.0236515		0.049842	0.0570737	0.037204	0.0413265	0.056636	0.0310345	0.021608
855	57	0.127222	0.214021	0.190115	0.201018	0.096928	0.240666	0.183695	0.273079	0.060644	0.24938	0.228485	0.252956	0.209546	0.077127	0.25096	0.241904	0.250148	0.092178		0.0342492	0.034249	0.034249	0.0538099	0.035265	0.0478163	0.017665		0.054789	0.0707814	0.035146	0.0415293	0.048197	0.0340546	0.022516
856	57.0667	0.127023	0.211167	0.188262	0.193661	0.152306	0.250452	0.186507	0.286624	0.072589	0.215389	0.231331	0.266232	0.201179	0.075305	0.263085	0.247213	0.250956	0.150219		0.0341027	0.034103	0.034103	0.0621758	0.031493	0.041748	0.0199025		0.048577	0.0606235	0.033502	0.0531516	0.048739	0.0329497	0.018195
857	57.1333	0.124224	0.20774	0.183418	0.202693	0.154738	0.249522	0.198132	0.290135	0.065476	0.218944	0.231807	0.257477	0.187027	0.067853	0.266226	0.252406	0.234224	0.087546		0.0356196	0.03562	0.03562	0.0658617	0.035322	0.046467	0.0245902		0.053337	0.0618969	0.036214	0.032855	0.045272	0.0285826	0.01595
858	57.2	0.130844	0.205034	0.183637	0.196938	0.114901	0.250818	0.189496	0.286967	0.072264	0.233107	0.230369	0.266129	0.185191	0.064198	0.282954	0.236548	0.221851	0.06985		0.0359212	0.035921	0.035921	0.0554815	0.042486	0.046552	0.0212937		0.056295	0.0553794	0.035145	0.0291083	0.051155	0.0340388	0.02713
859	57.2667	0.135997	0.205663	0.178058	0.199255	0.080942	0.242609	0.191718	0.289617	0.047601	0.218813	0.212606	0.282658	0.207921	0.094233	0.277444	0.242699	0.250764	0.074852		0.0338071	0.033807	0.033807	0.0560805	0.039493	0.0444539	0.0223617		0.068291	0.0867954	0.032297	0.0294862	0.050282	0.0348697	0.01957
860	57.3333	0.140474	0.212006	0.180589	0.193994	0.059212	0.241726	0.18771	0.293876	0.054862	0.206881	0.206855	0.289637	0.223406	0.078816	0.29161	0.249095	0.265177	0.093057		0.0314519	0.031452	0.031452	0.0682417	0.032649	0.0439264	0.02456		0.060218	0.0507414	0.039511	0.0269963	0.050477	0.0328887	0.021252
861	57.4	0.143995	0.210542	0.177452	0.194406	0.036437	0.23784	0.186303	0.293084	0.05938	0.192833	0.202899	0.278679	0.22441	0.093569	0.303619	0.241398	0.256862	0.067245		0.0338071	0.033807	0.033807	0.0623016	0.036944	0.0487274	0.0220039		0.066185	0.0709925	0.032624	0.0296144	0.048616	0.0281435	0.026335
862	57.4667	0.150536	0.22203	0.182118	0.203897	0.042034	0.241099	0.195081	0.284772	0.058638	0.183404	0.214838	0.272133	0.221177	0.098147	0.318276	0.253863	0.264537	0.060458		0.0423393	0.042339	0.042339	0.0630303	0.03413	0.0478995	0.0225357		0.077107	0.0531149	0.028685	0.0358567	0.051147	0.0264841	0.023213
863	57.5333	0.151987	0.219574	0.182783	0.218666	0.029158	0.23335	0.190842	0.287504	0.072146	0.187276	0.198987	0.277125	0.219697	0.091945	0.325348	0.225917	0.258432	0.080238		0.0432449	0.043245	0.043245	0.0651706	0.032723	0.0482367	0.0220299		0.051802	0.0646725	0.031394	0.0586332	0.052946	0.0325122	0.019955
864	57.6	0.160035	0.21726	0.187382	0.212949	0.054806	0.226645	0.200549	0.281645	0.064346	0.198169	0.214392	0.281941	0.216694	0.086992	0.315814	0.207412	0.251807	0.091859		0.0411035	0.041104	0.041104	0.0628954	0.038165	0.046595	0.0232049		0.052144	0.058969	0.026391	0.0333048	0.049392	0.0284954	0.025263
865	57.6667	0.147311	0.222204	0.185639	0.204586	0.024969	0.238243	0.202873	0.279	0.050689	0.197595	0.20351	0.278533	0.211439	0.103323	0.310694	0.209662	0.249641	0.089777		0.0357946	0.035795	0.035795	0.0600858	0.039216	0.0493521	0.0248874		0.048577	0.0279111	0.037713	0.022678	0.047345	0.0253259	0.020746
866	57.7333	0.150695	0.219321	0.17958	0.210472	0.020982	0.225377	0.195448	0.288665	0.059643	0.198485	0.205329	0.276987	0.210212	0.076977	0.297507	0.208895	0.263669	0.099368		0.0388605	0.038861	0.038861	0.0630279	0.034012	0.0484173	0.0220472		0.067681	0.0490844	0.045895	0.0379335	0.040346	0.0285823	0.018519
867	57.8	0.151678	0.227942	0.184488	0.212234	0.025397	0.239616	0.158647	0.300793	0.053037	0.193066	0.204707	0.275746	0.211512	0.090101	0.322247	0.219811	0.26257	0.091686		0.0389858	0.038986	0.038986	0.0689569	0.03393	0.0483637	0.0231736		0.048063	0.0580821	0.031374	0.0219008	0.038987	0.0274146	0.018655
868	57.8667	0.145068	0.22676	0.184798	0.208781	0.040075	0.242943	0.166339	0.29198	0.054133	0.19794	0.19811	0.28494	0.20593	0.086483	0.332711	0.217971	0.280809	0.083919		0.037932	0.037932	0.037932	0.0562963	0.037736	0.0450316	0.023969		0.05418	0.0618549	0.032268	0.046684	0.039955	0.0262217	0.023089
869	57.9333	0.146463	0.238467	0.184264	0.209934	0.057125	0.248684	0.168115	0.284318	0.048719	0.195843	0.198349	0.272485	0.202085	0.091212	0.311417	0.207325	0.25639	0.09837		0.0335438	0.033544	0.033544	0.0622568	0.033691	0.0498359	0.0235202		0.068263	0.0593724	0.033619	0.0400587	0.044913	0.0302671	0.022377
870	58	0.151029	0.237331	0.176221	0.203533	0.066635	0.260436	0.172134	0.298602	0.042991	0.193942	0.186546	0.279321	0.213015	0.092081	0.312026	0.218678	0.266909	0.088512		0.0380322	0.038032	0.038032	0.0597289	0.026515	0.0461556	0.0187544		0.073312	0.0693484	0.027233	0.0434613	0.040884	0.0248463	0.019318
871	58.0667	0.153584	0.24318	0.181121	0.208646	0.089771	0.26238	0.167343	0.30447	0.044984	0.201646	0.177519	0.280351	0.220268	0.104534	0.32293	0.204532	0.279283	0.108224		0.032437	0.032437	0.032437	0.0591398	0.029817	0.048422	0.0208497		0.047815	0.0512198	0.030303	0.04629	0.047484	0.0235158	0.025631
872	58.1333	0.151573	0.251592	0.172506	0.214463	0.040444	0.263382	0.151051	0.301032	0.036768	0.200005	0.184815	0.284568	0.234577	0.074941	0.318197	0.198161	0.262999	0.068579		0.0389813	0.038981	0.038981	0.0644906	0.029337	0.0489297	0.0259791		0.05369	0.0725582	0.025538	0.0714583	0.043999	0.02426	0.02498
873	58.2	0.148096	0.241148	0.183419	0.220582	0.04257	0.268275	0.152054	0.30287	0.050129	0.201987	0.193996	0.279271	0.233379	0.089278	0.318563	0.187563	0.258858	0.067923		0.0347305	0.034731	0.034731	0.060542	0.028272	0.0476923	0.0227671		0.050167	0.0696149	0.027705	0.0435256	0.045513	0.0229731	0.021559
874	58.2667	0.136655	0.235891	0.185673	0.216501	0.036025	0.265441	0.139566	0.289911	0.045441	0.200564	0.191803	0.281556	0.232893	0.084241	0.309917	0.19177	0.27421	0.12609		0.036788	0.036788	0.036788	0.0586395	0.029829	0.0497255	0.0213038		0.046046	0.0515031	0.0288	0.052459	0.047031	0.0244987	0.024184
875	58.3333	0.139092	0.237572	0.181175	0.218047	0.030873	0.267852	0.145312	0.295133	0.05267	0.203415	0.194065	0.287637	0.233976	0.10542	0.299395	0.191567	0.275964	0.091362		0.0333555	0.033356	0.033356	0.0561267	0.025639	0.0466896	0.0260306		0.034403	0.0681657	0.026173	0.0213043	0.053397	0.0238275	0.020585
876	58.4	0.133069	0.236539	0.179303	0.211902	0.024948	0.261068	0.143726	0.288907	0.050946	0.212444	0.190452	0.297044	0.247063	0.086769	0.289176	0.186844	0.257832	0.08762		0.0314909	0.031491	0.031491	0.0644006	0.03352	0.05043	0.0265803		0.080529	0.0552292	0.033993	0.0153443	0.049309	0.0218126	0.025469
877	58.4667	0.133266	0.235185	0.183428	0.209924	0.024032	0.259689	0.144596	0.295493	0.071047	0.202238	0.191539	0.291995	0.244279	0.098544	0.256162	0.183178	0.264843	0.096706		0.0295276	0.029528	0.029528	0.0656489	0.03138	0.0473635	0.0216654		0.058182	0.0709725	0.02607	0.0220674	0.056295	0.0232117	0.02445
878	58.5333	0.132603	0.245173	0.185354	0.20731	0.034585	0.256512	0.156397	0.290706	0.061353	0.207328	0.190013	0.303067	0.244199	0.084934	0.252541	0.201306	0.278912	0.093484		0.0326989	0.032699	0.032699	0.0639688	0.032616	0.0543681	0.0184419		0.050379	0.0660172	0.02873	0.0145704	0.048813	0.0219823	0.028764
879	58.6	0.124914	0.236077	0.192216	0.212613	0.038937	0.253369	0.160537	0.291096	0.046544	0.196213	0.191669	0.298961	0.255258	0.095558	0.257384	0.193504	0.24162	0.097744		0.0355075	0.035508	0.035508	0.0572685	0.039901	0.0490798	0.0222126		0.049978	0.0592637	0.023453	0.0143667	0.064024	0.0228162	0.030326
880	58.6667	0.140206	0.235024	0.198939	0.221735	0.051098	0.264464	0.154449	0.299808	0.043489	0.211688	0.194851	0.309911	0.232833	0.10068	0.231613	0.190161	0.233928	0.094721		0.0339181	0.033918	0.033918	0.0632161	0.038433	0.0482303	0.0239869		0.052948	0.0428074	0.026154	0.0217268	0.04928	0.0251237	0.025746
881	58.7333	0.145693	0.242511	0.170633	0.21561	0.036652	0.265798	0.147547	0.300033	0.047299	0.210319	0.193566	0.316605	0.253437	0.098107	0.234698	0.185307	0.225498	0.105247		0.0337733	0.033773	0.033773	0.0523928	0.041765	0.0519115	0.02		0.068295	0.0554322	0.030633	0.0117647	0.051901	0.0220325	0.039058
882	58.8	0.145626	0.24245	0.171151	0.227211	0.066208	0.260522	0.17234	0.306787	0.045584	0.206563	0.190817	0.31306	0.242696	0.093468	0.207338	0.192071	0.238829	0.137126		0.0340953	0.034095	0.034095	0.0595762	0.043478	0.0497322	0.0237654		0.080096	0.0571605	0.02802	0.0145153	0.052111	0.0277883	0.025834
883	58.8667	0.135956	0.24266	0.194565	0.23039	0.080057	0.256082	0.178374	0.298739	0.034477	0.210708	0.186653	0.293065	0.277329	0.06695	0.19499	0.197176	0.210314	0.104436		0.0347615	0.034762	0.034762	0.0595331	0.049394	0.0474882	0.0230188		0.089146	0.067829	0.029773	0.0147924	0.048935	0.0251049	0.032918
884	58.9333	0.147826	0.24506	0.189791	0.23416	0.110384	0.2437	0.177693	0.288998	0.041139	0.223812	0.201083	0.295259	0.232511	0.083182	0.206616	0.210835	0.232941	0.085116		0.0343616	0.034362	0.034362	0.0543629	0.054065	0.0496593	0.0246521		0.081698	0.0616266	0.022949	0.0143833	0.043836	0.0265768	0.030543
885	59	0.144848	0.253931	0.180461	0.239282	0.119201	0.252063	0.191899	0.294734	0.049729	0.221822	0.197971	0.307912	0.240497	0.081221	0.216168	0.205698	0.209354	0.05912		0.0317516	0.031752	0.031752	0.0543494	0.057499	0.0531043	0.0195928		0.094752	0.0824158	0.025038	0.0112528	0.047444	0.0285714	0.02798
886	59.0667	0.137112	0.247034	0.190965	0.233192	0.100685	0.237003	0.188611	0.284029	0.044118	0.229842	0.195054	0.314777	0.249317	0.071811	0.205598	0.202077	0.212716	0.065395		0.0366142	0.036614	0.036614	0.054007	0.05117	0.0447123	0.0273588		0.092838	0.0306677	0.018608	0.0120457	0.049016	0.0252303	0.023081
887	59.1333	0.138615	0.25613	0.188937	0.243398	0.067766	0.245649	0.185361	0.294373	0.047482	0.222491	0.207465	0.30094	0.248458	0.080291	0.198927	0.217319	0.199648	0.103169		0.0348703	0.03487	0.03487	0.0458928	0.047581	0.0468482	0.0231543		0.058442	0.0278638	0.024793	0.0126409	0.041431	0.0228162	0.030283
888	59.2	0.133523	0.260183	0.190215	0.241376	0.103753	0.252517	0.192877	0.282947	0.045243	0.239302	0.219892	0.301781	0.248083	0.071942	0.202127	0.215513	0.21748	0.0607		0.0359569	0.035957	0.035957	0.0524409	0.040859	0.0469691	0.0207762		0.082886	0.0220859	0.028023	0.0147192	0.044521	0.0275229	0.030465
889	59.2667	0.130801	0.249093	0.195379	0.237743	0.086252	0.255219	0.201724	0.293993	0.042774	0.238551	0.212889	0.313417	0.252284	0.089515	0.190749	0.225578	0.197976	0.058847		0.0390035	0.039004	0.039004	0.0587326	0.047511	0.0474882	0.0237068		0.084497	0.035018	0.027433	0.0245863	0.048442	0.0293501	0.024314
890	59.3333	0.127188	0.245201	0.195502	0.241142	0.082472	0.278884	0.198225	0.297259	0.047116	0.231907	0.214481	0.310471	0.249732	0.093424	0.174652	0.236762	0.192469	0.045721		0.0347625	0.034763	0.034763	0.0553535	0.043986	0.0453284	0.0232186		0.106033	0.0192326	0.035059	0.0132013	0.05237	0.0349068	0.02563
891	59.4	0.125723	0.250285	0.193484	0.237963	0.08049	0.284823	0.20554	0.297658	0.04295	0.224283	0.216014	0.309751	0.256033	0.102097	0.189885	0.22929	0.170032	0.07242		0.0368284	0.036828	0.036828	0.0530141	0.048922	0.043907	0.0237562		0.075394	0.0675155	0.031213	0.0179029	0.049981	0.0319688	0.027091
892	59.4667	0.131801	0.246634	0.189165	0.238196	0.066192	0.247298	0.197015	0.295381	0.047342	0.22661	0.221294	0.316973	0.267713	0.095238	0.202132	0.232032	0.192828	0.049517		0.0382133	0.038213	0.038213	0.0546252	0.047263	0.0460069	0.0215097		0.089198	0.0654982	0.031251	0.0146605	0.039946	0.0352833	0.023124
893	59.5333	0.140966	0.26859	0.185093	0.242112	0.0683	0.272077	0.213509	0.277355	0.047528	0.231618	0.229106	0.309645	0.263752	0.089309	0.224046	0.234264	0.193814	0.122457		0.0344155	0.034416	0.034416	0.0563778	0.055345	0.044112	0.0209465		0.061209	0.0597183	0.027141	0.0111181	0.044743	0.0328482	0.017726
894	59.6	0.147673	0.254107	0.187202	0.237482	0.044462	0.272901	0.206201	0.281505	0.050117	0.199931	0.233117	0.295807	0.262781	0.092462	0.180607	0.231083	0.192365	0.085545		0.0300264	0.030026	0.030026	0.0569867	0.053728	0.0480607	0.0252056		0.08766	0.0558925	0.029945	0.0151683	0.042326	0.0287307	0.017641
895	59.6667	0.156577	0.243801	0.189268	0.241011	0.077519	0.271547	0.200934	0.289161	0.044785	0.182786	0.232401	0.305519	0.254772	0.093692	0.271932	0.234614	0.175612	0.082235		0.0254094	0.025409	0.025409	0.0535238	0.050374	0.0464511	0.0235734		0.08895	0.0623285	0.023634	0.0191718	0.040671	0.0316828	0.017159
896	59.7333	0.164846	0.258641	0.191335	0.253115	0.085111	0.267669	0.197931	0.286474	0.043437	0.184151	0.234475	0.277116	0.240577	0.101129	0.28612	0.248832	0.175432	0.063968		0.03517	0.03517	0.03517	0.0691063	0.035603	0.0476741	0.0221431		0.072941	0.0572915	0.025948	0.0149944	0.039361	0.0346913	0.017922
897	59.8	0.163564	0.257665	0.189701	0.242746	0.098373	0.269933	0.189751	0.263401	0.059935	0.184182	0.245501	0.284929	0.248081	0.102299	0.270729	0.242188	0.209302	0.096819		0.0254411	0.025441	0.025441	0.0579374	0.028273	0.0462922	0.0246821		0.079423	0.0501853	0.021698	0.0150173	0.041837	0.0375569	0.02304
898	59.8667	0.161053	0.258726	0.190036	0.245294	0.095927	0.251565	0.202798	0.280814	0.052447	0.196302	0.247767	0.281502	0.260646	0.081442	0.230267	0.25165	0.192804	0.061338		0.0279395	0.02794	0.02794	0.0634695	0.035401	0.0469579	0.0257417		0.067787	0.0590464	0.026077	0.0116695	0.044978	0.0322105	0.026007
899	59.9333	0.157149	0.265451	0.189326	0.249934	0.052203	0.259364	0.204796	0.264424	0.058502	0.187001	0.241076	0.279393	0.258662	0.095461	0.212984	0.251408	0.18167	0.136523		0.0284923	0.028492	0.028492	0.0643636	0.072581	0.0433955	0.0260621		0.073143	0.0582916	0.026563	0.0146782	0.045038	0.0306083	0.018262
900	60	0.160197	0.247312	0.183044	0.247134	0.068473	0.251785	0.205348	0.282905	0.056505	0.183274	0.245039	0.280717	0.261121	0.095287	0.235146	0.244351	0.185735	0.131895		0.0316955	0.031696	0.031696	0.0635238	0.073216	0.0436677	0.0230388		0.086489	0.0494409	0.021973	0.0160016	0.050174	0.0298398	0.016413
