# Supplementary material for: A conserved neuropeptide system links head and body motor circuits to enable adaptive behavior
Source: eLife. 2021 Nov 12;10:e71747. doi: 10.7554/eLife.71747 (PMC8626090; doi:10.7554/eLife.71747)
Supplement: Figure 8—source data 2. [file elife-71747-fig8-data2.xlsx]

## Sheet: Sheet1
Figure 8E
SMD calcium imaging (mean ratio GCaMP6s/mCherry)
ARS wild type	DIspersal wild type	ARS ckr-1(ok2502)
0.154593	0.0335462	0.03
0.189056	0.0283075	0.054322
0.172783	0.0484551	0.0327843
0.17789	0.0895008	0.0386413
0.208024	0.061534	0.0297745
0.175763	0.061534	0.027239
0.224538	0.0717677	0.017635
0.185767
0.251244
0.240272
0.220162
0.219362
0.241812
0.244827
0.0973375
0.065173
0.0741065
0.103362
